# Supplementary material
Source: publisher figshare collection journal article supplement (https://frontiersin.figshare.com/ndownloader/files/22530527)
Supplement: Supplementary file 1 [file 22530527]

## Sheet: Table 1 Primers, PCR param
Table 1. Primers, PCR parameters
	Name	Tm (C) (not incl M13 or Illumina tail)	Sequence (M13 tails in bold blue, Illumina tails in bold black)	Amplicon length incl primers (bp)	Cycles	Annealing temp (C)	Reference
12S Li segment
Bony fish	M13Li-F	56.6	TGT AAA ACG ACG GCC AGT GYC GGT AAA AYT CGT GCC AG	760	35	57	Li 2007
	M13Li-R	60.6	CAG GAA ACA GCT ATG AC YCC AAG YGC ACC TTC CGG TA				Li 2007
Cartilaginous fish	M13Li-S-F	54.6	TGT AAA ACG ACG GCC AGT GTT GGT HAA TCT CGT GCC AG	760	35	57	Stoeckle 2017
	M13Li-S-R	52.1	CAG GAA ACA GCT ATG AC TCC AAG TRC ACT TTC CAG TA				Stoeckle 2017
COI barcode
All fish	COI-3 cocktail VF2_t1 FishF2_t1 FishR2_tl FR1_t1	60.2 54.5 59.6 61.5	TGT AAA ACG ACG GCC AGT CAA CCA ACC ACA AAG ACA TTG GCA C TGT AAA ACG ACG GCC AGT CGA CTA ATC ATA AAG ATA TCG GCA C CAG GAA ACA GCT ATG AC ACT TCA GGG TGA CCG AAG AAT CAG AA CAG GAA ACA GCT ATG AC ACC TCA GGG TGT CCG AAR AAY CAR AA	740	35	54	Ivanova 2007
Rays	M13-RayCOIF2	53.5	TGT AAA ACG ACG GCC AGT GTT TTT GAC TTC TTC CCC CA	555	35	52	Kirchoff 2017
	M13-RayCOIR1	53.5	CAG GAA ACA GCT ATG AC GCC GAT TGC TAT TAT TGC TC				Kirchoff 2017
	M13-COI-F0	52	TGT AAA ACG ACG GCC AGT TAA CTC TCA GCC ATC TTA CC	845	35	52	Zeng 2016
	M13-COI-R823	52	CAG GAA ACA GCT ATG AC GCC GAT AGC TAT TAT TGC TCA				Zeng 2016
12S ECO V5 segment (metabarcoding target)
Bony fish, mammals	ECO-V5-F (AF)	50.1	TCG TCG GCA GCG TCA GAT GTG TAT AAG AGA CAG ACT GGG ATT AGA TAC CCC	200	40	52	Riaz 2011
	ECO-V5-R (AR)	49.6	GTC TCG TGG GCT CGG AGA TGT GTA TAA GAG ACA G TAG AAC AGG CTC CTC TAG				Riaz 2011
Cartilaginous fish	ECO-V5-SF (AFS)	48.7	TCG TCG GCA GCG TCA GAT GTG TAT AAG AGA CAG ACT GGG ATT AGA TAC CCT	200	40	52	Stoeckle 2018
	ECO-V5-R (AR)		same as for bony fish
PCR parameters template
			250 mM primers
			95 x 5m, ___ cycles of (95C 20s, ___C 20s, 72C 20s), 72C 1m

## Sheet: Table 2 12S vs NJ checklist
Table 2. GenBank 12S coverage for New Jersey marine fishes
Citation: Able, K.W. 1992. Checklist of New Jersey saltwater fishes. Bull. N.J. Acad. Sci. 37(1):1-11
Accessed at: http://www.state.nj.us/dep/fgw/chkfishmarine.htm
Taxonomic order	Family	Common Name	Scientific Name	Abundance	12S V5 ref seq	No 12S V5 ref seqs	Complete mitochondrion	New ref seqs this study
1	Myxinidae	Atlantic Hagfish	Myxine glutinosa	R	Y	2	M
2	Petromyzontidae	Sea Lamprey	Petromyzon marinus	C	Y	1	M
3	Odontaspididae	Sand Tiger	Odontaspis taurus	A	Y	5	M
4	Alopiidae	Bigeye Thresher Shark	Alopias superciliosus	O	Y	2	M
5	Alopiidae	Thresher Shark	Alopias vulpinus	R	Y	2	M
6	Cetorhinidae	Basking Shark	Cetorhinus maximus	R	Y	23	M
7	Lamnidae	White Shark	Carcharadon carcharias	R	Y	130	M
8	Lamnidae	Shortfin Mako	Isurus oxyrinchus	R	Y	4	M
9	Lamnidae	Porbeagle	Lamna nasus	R	Y	2	M
10	Scyliorhinidae	False Cat Shark	Pseudotriakis microdon	R	Y	1	M
11	Scyliorhinidae	Chain Dogfish	Scyliorhinus retifer	A	Y	2		this study
12	Carcharhinidae	Silky Shark	Carcharhinus falciformis	R	Y	3	M
13	Carcharhinidae	Bull Shark	Carcharhinus leucas	R	Y	1	M
14	Carcharhinidae	Blacktip Shark	Carcharhinus limbatus	R	Y	2	I	additional seqs this study
15	Carcharhinidae	Dusky Shark	Carcharhinus obscurus	CS	Y	1	M
16	Carcharhinidae	Sandbar Shark	Carcharhinus plumbeus	AS	Y	1	M
17	Carcharhinidae	Tiger Shark	Galeocerdo cuvier	R	Y	4	M
18	Carcharhinidae	Smooth Dogfish	Mustelus canis	A	Y	5
19	Carcharhinidae	Lemon Shark	Negaprion brevirostris	R
20	Carcharhinidae	Blue Shark	Prionace glauca	C	Y	2	M
21	Carcharhinidae	Atlantic Sharpnose Shark	Rhizoprionodon terraenovae	R	Y	4	I	this study
22	Sphyrnidae	Scalloped Hammerhead	Sphyrna lewini	R	Y	2	M
23	Sphyrnidae	Bonnethead	Sphyrna tiburo	R	Y	1	M
24	Sphyrnidae	Smooth Hammerhead	Sphyrna zygaena	R	Y	4	M
25	Squalidae	Spiny Dogfish	Squalus acanthias	ASF	Y	2	M
26	Squatinidae	Atlantic Angel Shark	Squatina dumeril	CSF	Y	4
27	Pristidae	Smalltooth Sawfish	Pristis pectinata	R	Y	2	M
28	Torpedinidae	Atlantic Torpedo	Torpedo nobiliana	R
29	Rajidae	Clearnose Skate	Raja eglanteria	A	Y	3
30	Rajidae	Little Skate	Raja erinacea	A	Y	1	M
31	Rajidae	Rosette Skate	Raja garmani	C
32	Rajidae	Barndoor Skate	Raja laevis	C	Y	1
33	Rajidae	Winter Skate	Raja ocellata	A	Y	5
34	Rajidae	Thorny Skate	Raja radiata	O	Y	3	M
35	Dasyatidae	Southern Stingray	Dasyatis americana	R	Y	1		this study
36	Dasyatidae	Roughtail Stingray	Dasyatis centroura	C	Y	5
37	Dasyatidae	Atlantic Stingray	Dasyatis sabina	R	Y	1		this study
38	Dasyatidae	Bluntnose Stingray	Dasyatis say	O	Y	3		this study
39	Dasyatidae	Spiny Butterfly Ray	Gymnura altavela	R	Y	2
40	Dasyatidae	Smooth Butterfly Ray	Gymnura micrura		Y	1
41	Myliobatidae	Spotted Eagle Ray	Aetobatus narinari	R	Y		M
42	Myliobatidae	Bullnose Ray	Myliobatis freminvillei	O	Y	5
43	Myliobatidae	Cownose Ray	Rhinoptera bonasus	OS	Y	2	M
44	Mobulidae	Manta	Manta birostris	R	Y	4	M
45	Mobulidae	Devil Ray	Mobula mobular	R	Y	4	M
46	Acipenseridae	Shortnose Sturgeon	Acipenser brevirostrum	C	Y	11	M
47	Acipenseridae	Atlantic Sturgeon	Acipenser oxyrhynchus	R	Y	2
48	Elopidae	Ladyfish	Elops saurus	R	Y	1	M
49	Elopidae	Tarpon	Megalops atlanticus	R	Y	1	M
50	Albulidae	Bonefish	Albula vulpes	R
51	Anguilidae	American Eel	Anguilla rostrata	A	Y	53	M
52	Muraenidae	Green Moray	Gymnothorax funebris	R
53	Muraenidae	Spotted Moray	Gymnothorax moringa	R
54	Ophichthidae	Speckled Worm Eel	Myrophis punctatus	R
55	Ophichthidae	Margined Snake Eel	Ophichthus cruentifer	O
56	Ophichthidae	Palespotted Eel	Ophichthus ocellatus	R
57	Congridae	Conger Eel	Conger oceanicus	C	Y	2
58	Clupeidae	Blueback Herring	Alosa aestivalis	A	Y	2	M
59	Clupeidae	Hickory Shad	Alosa mediocris	C	Y	2	M
60	Clupeidae	Alewife	Alosa pseudoharengus	A	Y	5	M
61	Clupeidae	American Shad	Alosa sapidissima	T	Y	7	M
62	Clupeidae	Atlantic Menhaden	Brevoortia tyrannus	A	Y	7	M
63	Clupeidae	Atlantic Herring	Clupea harengus	CW	Y	100	M
64	Clupeidae	Gizzard Shad	Dorosoma cepedianum	O	Y	6	M
65	Clupeidae	Round Herring	Etrumeus teres	O	Y	2	M
66	Clupeidae	Scaled Sardine	Harengula jaguana	R	Y	2	M
67	Clupeidae	Atlantic Thread Herring	Opisthonema oglinum	O	Y	1
68	Clupeidae	Spanish Sardine	Sardinella aurita	O	Y	1
69	Engraulidae	Striped Anchovy	Anchoa hepsetus	C	Y	1	M
70	Engraulidae	Bay Anchovy	Anchoa mitchilli	A	Y	1	M
71	Engraulidae	Silver Anchovy	Engraulis eurystole	O	Y	1
72	Ariidae	Gafftopsail Catfish	Bagre marinus	R	Y	1
73	Osmeridae	Rainbow smelt	Osmerus mordax	T	Y	3	M
74	Salmonidae	Rainbow Trout	Oncorhynchus mykiss	R	Y	17	M
75	Salmonidae	Atlantic Salmon	Salmo salar	R	Y	24	M
76	Salmonidae	Brown Trout	Salmo trutta	R	Y	29	M
77	Gonostomatidae	Longtooth Anglemouth	Gonostoma elongatum	R
78	Gonostomatidae	Mullers Pearlsides	Maurolicus muelleri	R
79	Gonostomatidae	Oceanic Lightfish	Vinciguerria nimbaria	R
80	Chlorophthalmidae	Shortnose Greeneye	Chlorophthalmus agassizi	C	Y	1	M
81	Synodontidae	Inshore Lizardfish	Synodus foetens	O	Y	3		this study
82	Synodontidae	Snakefish	Trachinocephalus myops	R	Y	2	M
83	Paralepidae	White Barracudina	Notolepis rissoi	R	Y	1
84	Paralepidae	Duckbill Barracudina	Paralepis atlantica	R
85	Paralepidae	Sharpchin Barracudina	Paralepis coregonoides	R
86	Myctophidae	Glacier Lanternfish	Benthosema glaciale	R	Y	1	M
87	Myctophidae	Smallfin Lanternfish	Benthosema suborbitale	R
88	Myctophidae	Horned Lanternfish	Ceratoscopelus maderensis	C	Y	1	M
89	Myctophidae	Warming's Lanternfish	Ceratoscopelus warmingi	R
90	Myctophidae	Longfin Lanternfish	Diogenichthys atlanticus	R	Y	1	M
91	Myctophidae	Benoit's Lanternfish	Hygophum benoiti	R
92	Myctophidae	Slender Lanternfish	Hygophum reinhardti	R
93	Myctophidae	Winged Lanternfish	Lampanyctus alatus	R
94	Myctophidae	Largescale Lanternfish	Symbolophorus veranyi	R
95	Bregmacerotidae	Antenna Codlet	Bregmaceros atlanticus	R	Y	1
96	Gadidae	Cusk	Brosme brosme	R
97	Gadidae	Fourbeard Rockling	Enchelyopus cimbrius	R	Y	1
98	Gadidae	Atlantic Cod	Gadus morhua	CWS	Y	170	M
99	Gadidae	Haddock	Melanogrammus aeglefinus	OWS	Y	7	M
100	Gadidae	Offshore Hake	Merluccius albidus	C	Y	2		this study
101	Gadidae	Silver Hake	Merluccius bilinearis	A	Y	2	M
102	Gadidae	Atlantic Tomcod	Microgadus tomcod	C	Y	2	M
103	Gadidae	Pollock	Pollachius virens	C	Y	7	M
104	Gadidae	Red Hake	Urophycis chuss	A	Y	1	M
105	Gadidae	Carolina Hake	Urophycis earlii	R
106	Gadidae	Spotted Hake	Urophycis regia	C	Y	1	M
107	Gadidae	White Hake	Urophycis tenuis	O	Y	1
108	Ophidiidae	Fawn Cusk-eel	Lepophidium profundorum	A	Y	2		this study
109	Ophidiidae	Striped Cusk-eel	Ophidion marginatum	C	Y	2
110	Ophidiidae	Crested Cusk-eel	Ophidion welshi	R
111	Batrachoididae	Oyster Toadfish	Opsanus tau	A	Y	1	M
112	Lophiidae	Goosefish	Lophius americanus	C	Y	3	M
113	Antennariidae	Striated Frogfish	Antennarius striatus	R	Y	1	M
114	Antennariidae	Sargassumfish	Histrio histrio	R	Y	1	M
115	Chaunacidae	Redeye Gaper	Chaunax stigmaeus	R
116	Exocoetidae	Clearwing Flyingfish	Cypselurus comatus	R
117	Exocoetidae	Bandwing Flyingfish	Cypselurus exsiliens	R
118	Exocoetidae	Spotfin Flyingfish	Cypselurus furcatus	R
119	Exocoetidae	Atlantic Flyingfish	Cypselurus melanurus	R
120	Exocoetidae	Flying Halfbeak	Euleptorhamphus velox	R
121	Exocoetidae	Ballyhoo	Hemiramphus brasiliensis	R
122	Exocoetidae	Silverstripe Halfbeak	Hyporhamphus unifasciatus	O	Y	1
123	Belonidae	Flat Needlefish	Ablennes hians	R	Y	2	M
124	Belonidae	Atlantic Needlefish	Strongylura marina	CS	Y	6	M
125	Belonidae	Agujon	Tylosurus acus	R	Y	6	M
126	Scomberesocidae	Atlantic Saury	Scomberesox saurus	R
127	Cyprinodontidae	Sheepshead minnow	Cyprinodon variegatus	A	Y	2	M
128	Cyprinodontidae	Marsh Killifish	Fundulus confluentus
129	Cyprinodontidae	Banded Killifish	Fundulus diaphanus	A	Y	2	M
130	Cyprinodontidae	Mummichog	Fundulus heteroclitus	A	Y	12	M
131	Cyprinodontidae	Spotfin Killifish	Fundulus luciae	C	Y	2		this study
132	Cyprinodontidae	Striped Killifish	Fundulus majalis	A	Y	2	M
133	Cyprinodontidae	Rainwater Killifish	Lucania parva	C	Y	2		this study
134	Poeciliidae	Eastern Mosquitofish	Gambusia holbrooki	C	Y	3	M
135	Atherinidae	Rough Silverside	Membras martinica	C	Y	2		this study
136	Atherinidae	Inland Silverside	Menidia beryllina	A	Y	1	M
137	Atherinidae	Atlantic Silverside	Menidia menidia	A	Y	191	M
138	Holocentridae	Deep Water Squirrelfish	Holocentrus bullisi	R
139	Holocentridae	Dusky Squirrelfish	Holocentrus vexillarius	R
140	Zeidae	Buckler Dory	Zenopsis conchifer	C	Y	1		this study
141	Gasterosteidae	Fourspine Stickleback	Apeltes quadracus	C	Y	1	M
142	Gasterosteidae	Threespine Stickleback	Gasterosteus aculeatus	C	Y	3	M
143	Gasterosteidae	Ninespine Stickleback	Pungitius pungitius	R	Y	12	M
144	Fistularidae	Bluespotted Cornetfish	Fistularia tabacaria	R
145	Centriscidae	Longspine Snipefish	Macroramphosus scolopax	R	Y	1	M
146	Syngnathidae	Lined Seahorse	Hippocampus erectus	CSF	Y	1	M
147	Syngnathidae	Opposum Pipefish	Microphis brachyurus	R	Y	2	M
148	Syngnathidae	Northern Pipefish	Syngnathus fuscus	A	Y	2	M
149	Syngnathidae	Chain Pipefish	Syngnathus louisianae	R
150	Syngnathidae	Sargassum Pipefish	Syngnathus pelagicus	R
151	Dactyloperidae	Flying Gurnard	Dactylopterus volitans	R	Y	1
152	Scorpaenidae	Blackbelly Rosefish	Helicolenus dactylopterus	A	Y	3		additional seqs this study
153	Scorpaenidae	Spinycheek Scorpionfish	Neomerinthe hemingwayi	R
154	Scorpaenidae	Highfin Scorpionfish	Pontinus rathbuni	R
155	Scorpaenidae	Barbfish	Scorpaena brasiliensis	R
156	Scorpaenidae	Mushroom Scorpionfish	Scorpaena inermis	R
157	Scorpaenidae	Smoothcheek Scorpionfish	Scorpaena isthmensis	R
158	Scorpaenidae	Spotted Scorpionfish	Scorpaena plumieri	R
159	Scorpaenidae	Acadian Redfish	Sebastes fasciatus	O	Y	1	M
160	Triglidae	Armored Searobin	Peristedion miniatum	C	Y	2		this study
161	Triglidae	Northern Searobin	Prionotus carolinus	A	Y	1
162	Triglidae	Striped Searobin	Prionotus evolans	A	Y	1	M
163	Cottidae	Sea Raven	Hemitripterus americanus	C	Y	1	12S
164	Cottidae	Grubby	Myoxocephalus aenaeus	C	Y	1
165	Cottidae	Longhorn Sculpin	Myoxocephalus octodecemspinosus	C	Y	3		additional seqs this study
166	Cottidae	Shorthorn Sculpin	Myoxocephalus scorpius	R	Y	2	M
167	Agonidae	Alligatorfish	Aspidophoroides monopterygius	R	Y	1
168	Cyclopteridae	Lumpfish	Cyclopterus lumpus	R	Y	2
169	Cyclopteridae	Atlantic Seasnail	Liparis atlanticus	R
170	Cyclopteridae	Inquiline Seasnail	Liparis inquilinus	C
171	Percichthyidae	White Perch	Morone americana	A	Y	1	M
172	Percichthyidae	Striped Bass	Morone saxatilis	A	Y	1	M
173	Percichthyidae	Wreckfish	Polyprion americanus	R	Y	1
174	Serranidae	Swallowtail bass	Anthias woodsi	O
175	Serranidae	Black Sea Bass	Centropristis striata	A	Y	2	M
176	Serranidae	Red Grouper	Epinephelus morio	R	Y	1
177	Serranidae	Warsaw Grouper	Epinephelus nigritus	R
178	Serranidae	Snowy Grouper	Epinephelus niveatus	R	Y	1
179	Serranidae	Black Grouper	Mycteroperca bonaci	R	Y	1
180	Serranidae	Gag	Mycteroperca microlepis	R	Y	1
181	Priacanthidae	Glasseye snapper	Priacanthus cruentatus	R
182	Malacanthidae	Blackline Tilefish	Caulolatilus cyanops	R
183	Malacanthidae	Tilefish	Lopholatilus chamaeleonticeps	A	Y	1
184	Pomatomidae	Bluefish	Pomatomus saltatrix	A	Y	3	M
185	Rachycentridae	Cobia	Rachycentron canadum	R	Y	5	M
186	Echeneidae	Sharksucker	Echeneis naucrates	R	Y	3	M
187	Echeneidae	Whitefin Sharksucker	Echeneis neucratoides	R	Y	1
188	Echeneidae	Marlinsucker	Remora osteochir	R	Y	1
189	Echeneidae	Remora	Remora remora	R	Y	1
190	Echeneidae	White Suckerfish	Remorina albescens	R	Y	1
191	Carangidae	African Pompano	Alectis ciliaris	R	Y	1	M
192	Carangidae	Yellow Jack	Carangoides bartholomaei	R	Y	1		this study
193	Carangidae	Blue Runner	Caranx crysos	OSF
194	Carangidae	Crevalle Jack	Caranx hippos	CSF
195	Carangidae	Horse-eye Jack	Caranx latus	R	Y	1
196	Carangidae	Bar Jack	Caranx ruber	O
197	Carangidae	Atlantic Bumper	Chloroscombrus chrysurus	R
198	Carangidae	Round Scad	Decapterus punctatus	R
199	Carangidae	Pilotfish	Naucrates ductor	R	Y	1
200	Carangidae	Leatherjack	Oligoplites saurus	O
201	Carangidae	Bigeye Scad	Selar crumenophthalmus	R	Y	1	M
202	Carangidae	Atlantic Moonfish	Selene setapinnis	OS	Y	2
203	Carangidae	Lookdown	Selene vomer	OS
204	Carangidae	Greater Amberjack	Seriola dumerili	R	Y	1	M
205	Carangidae	Almaco Jack	Seriola rivoliana	R	Y	3	M
206	Carangidae	Banded Rudderfish	Seriola zonata	OS
207	Carangidae	Florida Pompano	Trachinotus carolinus	CS	Y	2	M
208	Carangidae	Permit	Trachinotus falcatus	CS
209	Carangidae	Palometa	Trachinotus goodei	CS
210	Carangidae	Rough Scad	Trachurus lathami	R	Y	3
211	Carangidae	Cottonmouth Jack	Uraspis secunda	R	Y	1	M
212	Coryphaenidae	Dolphin	Coryphaena hippurus	CS	Y	9	M
213	Bramidae	Atlantic pomfret	Brama brama	R
214	Lutjanidae	Schoolmaster	Lutjanus apodus	R
215	Lutjanidae	Red Snapper	Lutjanus campechanus	R	Y	1
216	Lutjanidae	Cubera Snapper	Lutjanus cyanopterus	R
217	Lutjanidae	Gray snapper	Lutjanus griseus	OS	Y	2		this study
218	Lutjanidae	Yellowtail snapper	Ocyurus chrysurus	R
219	Lutjanidae	Vermillion snapper	Rhomboplites aurorubens	R
220	Lobotidae	Tripletail	Lobotes surinamensis		Y	1	M
221	Gerreidae	Irish pompano	Diapterus auratus	R	Y	1
222	Gerreidae	Spotfin mojarra	Eucinostomus argenteus	R	Y	4
223	Gerreidae	Silver jenny	Eucinostomus gula	R	Y	4
224	Gerreidae	Tidewater mojarra	Eucinostomus harengulus	R	Y
225	Gerreidae	Flagfin mojarra	Eucinostomus melanopterus	R	Y	3
226	Haemulidae	Pigfish	Orthopristis chrysoptera	R
227	Sparidae	Sheepshead	Archosargus probatocephalus	R
228	Sparidae	Sea bream	Archosargus rhomboidalis	R
229	Sparidae	Spottail pinfish	Diplodus holbrooki	R
230	Sparidae	Pinfish	Lagodon rhomboides	R	Y	1
231	Sparidae	Scup	Stenotomus chrysops	A	Y	1	M
232	Sciaendae	Silver perch	Bairdiella chrysoura	C	Y	5
233	Sciaendae	Spotted seatrout	Cynoscion nebulosus	R	Y	1
234	Sciaendae	Weakfish	Cynoscion regalis	A	Y	2	M
235	Sciaendae	Banded drum	Larimus fasciatus	R	Y	2		this study
236	Sciaendae	Spot	Leiostomus xanthurus	C-A	Y	4	M
237	Sciaendae	Southern kingfish	Menticirrhus americanus	O	Y	4		this study
238	Sciaendae	Northern kingfish	Menticirrhus saxatilis	C	Y	2	M
239	Sciaendae	Atlantic croaker	Micropogonias undulatus	C	Y	3
240	Sciaendae	Black drum	Pogonias cromis	C	Y	1
241	Sciaendae	Red drum	Sciaenops ocellatus	O	Y	1	M
242	Mullidae	Red goatfish	Mullus auratus	R	Y	2
243	Mullidae	Spotted goatfish	Pseudupeneus maculatus	R	Y	2
244	Kyphosidae	Bermuda chub	Kyphosus sectatrix	R	Y	10
245	Ephippidae	Atlantic spadefish	Chaetodipterus faber	R	Y	2
246	Chaetodontidae	Foureye butterflyfish	Chaetodon capistratus	R	Y	1
247	Chaetodontidae	Spotfin butterflyfish	Chaetodon ocellatus	CF	Y	1
248	Chaetodontidae	Banded butterflyfish	Chaetodon striatus	R	Y	1
249	Pomacanthidae	Gray angelfish	Pomacanthus arcuatus	R	Y	2		additional seqs this study
250	Pomacenthidae	Sergeant major	Abudefduf saxatilIs	R	Y	3
251	Mugilidae	Striped mullet	Mugil cephalus	A	Y	11	M
252	Mugilidae	White mullet	Mugil curema	A	Y	13	M
253	Sphyraenidae	Great barracuda	Sphyraena barracuda	R	Y	1	M
254	Sphyraenidae	Northern sennet	Sphyraena borealis	C	Y	2		this study
255	Polynemidae	Atlantic threadfin	Polydactylus octonemus	R
256	Labridae	Tautog	Tautoga onitis	A	Y	4	M
257	Labridae	Cunner	Tautogolabrus adsperus	C	Y	1	M
258	Scaridae	Emerald parrotfish	Nicholsina usta	R	Y	2
259	Zoarcidae	Ocean pout	Zoarces americanus	C	Y	2		this study
260	Stichaeidae	Snakeblenny	Lumpenus lampretaeformis	R
261	Stichaeidae	Arctic shanny	Stichaeus punctatus	R
262	Stichaeidae	Radiated shanny	Ulvaria subbifurcata	R	Y	2
263	Pholidae	Rock gunnel	Pholis gunnellus	R	Y	3
264	Anarhichadidae	Atlantic wolffish	Anarhichas lupus	R	Y	86	M
265	Uranoscopidae	Northern stargazer	Astroscopus guttatus	O	Y	2
266	Blenniidae	Striped Blenny	Chasmodes bosquianus	O	Y	2		this study
267	Blenniidae	Crested Blenny	Hypleurochilus geminatus	R
268	Blenniidae	Feather Blenny	Hypsoblennius hentz	O	Y	1		this study
269	Blenniidae	Seaweed Blenny	Parablennius marmoreus	R
270	Ammodytidae	American Sand Lance	Ammodytes americanus	A	Y	1	M
271	Ammodytidae	Northern Sand Lance	Ammodytes dubius	A	Y	1	M
272	Eleotridae	Fat Sleeper	Dormitator maculatas	R
273	Gobiidae	Darter Goby	Gobionellus boleosoma	R
274	Gobiidae	Highfin Goby	Gobionellus oceanicus	R
275	Gobiidae	Naked Goby	Gobiosoma bosc	A	Y	4
276	Gobiidae	Seaboard Goby	Gobiosoma ginsburgi	O	Y	3
277	Acanthuridae	Ocean Surgeon	Acanthurus bahianus	R
278	Acanthuridae	Blue Tang	Acanthurus coeruleus	R
279	Trichiuridae	Oilfish	Ruvettus pretiosus	R	Y	1	M
280	Trichiuridae	Atlantic Cutlassfish	Trichiurus lepturus	R	Y	1	M
281	Scombridae	Wahoo	Acanthocybium solandri	R	Y	2	M
282	Scombridae	Frigate Mackerel	Auxis thazard	R	Y	3	M
283	Scombridae	Little Tunny	Euthynnus alletteratus	CS	Y	3	M
284	Scombridae	Skipjack Tuna	Katsuwonus pelamis	R	Y	4	M
285	Scombridae	Atlantic Bonito	Sarda sarda	O
286	Scombridae	Chub Mackerel	Scomber japonicus	R	Y	2	M
287	Scombridae	Atlantic Mackerel	Scomber scombrus	A	Y	2	M
288	Scombridae	King Mackerel	Scomberomorus cavalla	O	Y	1	M
289	Scombridae	Spanish Mackerel	Scomberomorus maculatus	O	Y	1
290	Scombridae	Cero	Scomberomorus regalis	O
291	Scombridae	Albacore	Thunnus alalunga	C	Y	45	M
292	Scombridae	Yellowfin Tuna	Thunnus albacares	C	Y	11	M
293	Scombridae	Bigeye Tuna	Thunnus obesus	O	Y	4	M
294	Scombridae	Bluefin Tuna	Thunnus thynnus	CS	Y	11	M
295	Xiphiidae	Swordfish	Xiphias gladias	CS	Y	6	M
296	Istiophoridae	Sailfish	Istiophorus platypterus	R	Y	5	M
297	Istiophoridae	Blue Marlin	Makaira nigricans	R	Y	3	M
298	Istiophoridae	White Marlin	Tetrapturus albidus	C	Y	3	M
299	Stromateidae	Black Ruff	Centrolophus niger	R
300	Stromateidae	Black Fathead	Cubiceps baxteri	R
301	Stromateidae	Barrelfish	Hyperoglyphe perciformis	R
302	Stromateidae	Harvestfish	Peprilus alepidotus	O
303	Stromateidae	Butterfish	Peprilus triacanthus	A	Y	3	M
304	Stromateidae	Freckled Driftfish	Psenes cyanophrys	R	Y	1	M
305	Stromateidae	Bluefin Driftfish	Psenes pellucidus	R	Y	1	M
306	Stromateidae	Bigeye Squaretail	Tetragonurus atlanticus	R	Y	1	M
307	Bothidae	Twospot Flounder or Spottail Flounder	Bothus robinsi	R	Y	1
308	Bothidae	Gulf Stream Flounder	Citharichthys arctifrons	A	Y	2		this study
309	Bothidae	Horned Whiff	Citharichthys cornutus	R
310	Bothidae	Angelfin Whiff	Citharichthys gymnorhinus	R
311	Bothidae	Bay Whiff	Citharichthys spilopterus	R
312	Bothidae	Smallmouth Flounder	Etropus microstomus	C	Y	1
313	Bothidae	Gulf Flounder	Paralichthys albigutta	R	Y	6
314	Bothidae	Summer Flounder	Paralichthys dentatus	A	Y	2	M
315	Bothidae	Fourspot Flounder	Paralichthys oblongus	C	Y	2
316	Bothidae	Windowpane	Scophthalmus aquosus	C	Y	3
317	Bothidae	Dusky Flounder	Syacium papillosum	R	Y	1
318	Pleuronectidae	Witch Flounder	Glyptocephalus cynoglossus	C	Y	2		this study
319	Pleuronectidae	American Plaice	Hippoglossoides platessoides	R	Y	2
320	Pleuronectidae	Atlantic Halibut	Hippoglossus hippoglossus	R	Y	4	M
321	Pleuronectidae	Winter Flounder	Pseudopleuronectes americanus	A	Y	2
322	Pleuronectidae	Yellowtail Flounder	Pleuronectes ferrugineus	C	Y	2
323	Achiridae	Hogchoker	Trinectes maculatus	C	Y	2	M
324	Cynoglossidae	Blackcheek Tonguefish	Symphurus plagiusa	R	Y	1	M
325	Balistidae	Orange Filefish	Aluterus schoepfi	R	Y	1
326	Balistidae	Gray Triggerfish	Balistes capriscus	R	Y	2
327	Balistidae	Queen Triggerfish	Balistes vetula	R	Y	3	M
328	Balistidae	Ocean Triggerfish	Canthidermis sufflamen	O	Y	1
329	Balistidae	Fringed Filefish	Monacanthus ciliatus	R
330	Balistidae	Planehead Filefish	Monacanthus hispidus	R	Y	4
331	Ostraciidae	Scrawled Cowfish	Lactophrys quadricornis	R	Y	1
332	Ostraciidae	Trunkfish	Lactophrys trigonus	R
333	Ostraciidae	Smooth Trunkfish	Lactophrys triqueter	R	Y	1
334	Tetraodontidae	Web Burrfish	Chilomycterus antillarum	R
335	Tetraodontidae	Spotted Burrfish	Chilomycterus reticulatus	R	Y	1	M
336	Tetraodontidae	Striped Burrfish	Chilomycterus schoepfi	O	Y	1	M
337	Tetraodontidae	Porcupinefish	Diodon hystrix	R	Y	3	M
338	Tetraodontidae	Smooth Puffer	Lagocephalus laevigatus	OS	Y	2	M
339	Tetraodontidae	Northern Puffer	Sphoeroides maculatus	CS	Y	2
340	Tetraodontidae	Checkered Puffer	Sphoeroides testudineus	R	Y	1	M
341	Molidae	Ocean Sunfish	Mola mola	O	Y	4	M

## Sheet: Table 3 Non-checklist species
Table 3. Non-checklist fishes detected or analyzed
Family	Common Name	Scientific Name	12S V5 ref seq	No 12S V5 ref seqs	Complete mitochondrion	New ref seqs this study	Comments
Ammodytidae	Pacific sand lance	Ammodytes hexapterus	Y	1	M		detected this study
Scombridaae	Butterfly kingfish	Gasterochisma melampus	Y	9	M		detected this study
Gobiesocidae	Skilletfish	Gobiesox strumosus	Y	1			detected this study
Osmeridae	Capelin	Mallotus villosus	Y	2	M		detected this study
Sciaendae	Gulf kingfish	Menticirrhus littoralis	Y	2		this study	detected this study
Myliobatidae	Brazilian cownose ray	Rhinoptera brasiliensis	Y	2		this study	detected this study
Belonidae	Houndfish	Tylosurus crocodilus	Y	5		additional seqs this study
Mullidae	Dwarf goatfish	Upeneus parvus	Y	2		this study

## Sheet: Table 4 Collection, DNA data
Table 4. Collection, DNA data
OCEAN											BAY											TAP WATER (negative control)
Collection date	Site	Volume collected (mL)	Date filtered	Interval collection to filtration (d)	Filter number	Volume filtered (mL)	Date extracted	Interval filtration to extraction (d)	DNA yield (ng/liter filtered)		Collection date	Site	Volume collected (mL)	Date filtered	Interval collection to filtration (d)	Filter number	Volume filtered (mL)	Date extracted	Interval filtration to extraction (d)	DNA yield (ng/liter filtered)		Collection date	Site	Volume collected (mL)	Date filtered	Interval collection to filtration (d)	Filter number	Volume filtered (mL)	Date extracted	Interval filtration to extraction (d)	DNA yield (ng/liter filtered)
2017-04-02	BLO	1000	2017-04-03	1	195	1000	2017-05-08	35	1381.5		2017-04-02	BLB	1000	2017-04-03	1	196	900	2017-05-08	35	1580		2017-05-15	TAP	1000	2017-05-15	0	217	1000	2017-06-02	18	78.75
2017-04-16	BLO	1000	2017-04-17	1	202	1000	2017-05-09	22	1165.5		2017-04-16	BLB	1000	2017-04-17	1	203	750	2017-05-09	22	1674		2017-05-24	TAP	1000	2017-05-24	0	223	1000	2017-06-02	9	101.7
2017-04-23	BLO	1000	2017-04-25	2	207	1000	2017-05-09	14	967.5		2017-04-23	BLB	1000	2017-04-25	2	208	1000	2017-05-09	14	832.5		2017-06-01	TAP	1000	2017-06-01	0	230	1000	2017-06-02	1	43.965
2017-05-14	BLO	1000	2017-05-15	1	218	1000	2017-06-02	18	2340		2017-05-14	BLB	1000	2017-05-15	1	219	500	2017-06-02	18	2592		2017-10-20	TAP	1000	2017-10-20	0	272	1000	2017-12-08	49	414.9
2017-05-29	BLO	1000	2017-05-30	1	226	750	2017-06-02	3	1866		2017-05-29	BLB	1000	2017-05-30	1	227	500	2017-06-02	3	3078		2017-10-26	TAP	1000	2017-10-26	0	277	1000	2017-12-08	43	112.95
2017-06-11	BLO	1000	2017-06-12	1	233	1000	2017-09-12	92	2610		2017-06-11	BLB	1000	2017-06-12	1	234	500	2017-09-12	92	5220		2017-11-02	TAP	1000	2017-11-02	0	287	1000	2017-12-11	39	57.6
2017-07-03	BLO	1000	2017-07-04	1	239	1000	2017-09-12	70	5130		2017-07-03	BLB	1000	2017-07-04	1	240	500	2017-09-12	70	5400		2017-11-09	TAP	1000	2017-11-09	0	291	1000	2017-12-11	32	57.6
2017-07-09	BLO	1000	2017-07-10	1	243	500	2017-09-12	64	5130		2017-07-09	BLB	1000	2017-07-10	1	244	500	2017-09-12	64	5310		2018-03-29	TAP	1000	2018-03-29	0	334	1000	2018-06-14	77	135.85
2017-07-23	BLO	1000	2017-07-24	1	247	400	2017-09-14	52	6300		2017-07-23	BLB	1000	2017-07-24	1	248	400	2017-09-14	52	9630		2018-04-06	TAP	1000	2018-04-06	0	338	1000	2018-06-14	69	820.8
2017-08-06	BLO	1000	2017-08-07	1	253	750	2017-09-14	38	6360		2017-08-06	BLB	1000	2017-08-07	1	254	450	2017-09-14	38	8740		2018-04-13	TAP	1000	2018-04-13	0	342	1000	2018-06-15	63	308.75
2017-08-27	BLO	1000	2017-08-28	1	255	500	2017-09-19	22	3690		2017-08-27	BLB	1000	2017-08-28	1	256	500	2017-09-19	22	4860		2018-04-20	TAP	1000	2018-04-20	0	344	1000	2018-06-15	56	683.05
2017-09-04	BLO	1000	2017-09-05	1	257	1000	2017-09-19	14	2475		2017-09-04	BLB	1000	2017-09-05	1	258	700	2017-09-19	14	4963		2018-06-07	TAP	1000	2018-06-07	0	364	1000	2018-06-19	12	279.3
2017-09-10	BLO	1000	2017-09-11	1	259	1000	2017-09-19	8	6300		2017-09-10	BLB	1000	2017-09-11	1	260	700	2017-09-19	8	6686		2018-08-17	TAP	1000	2018-08-17	0	391	1000	2018-09-04	18	116.85
2017-09-17	BLO	1000	2017-09-18	1	261	900	2017-09-19	1	5000		2017-09-17	BLB	1000	2017-09-18	1	262	750	2017-09-19	1	3972		2018-10-05	TAP	1000	2018-10-05	0	435	1000	2018-10-22	17	146.3
2017-10-01	BLO	1000	2017-10-02	1	265	1000	2017-12-08	67	2520		2017-10-01	BLB	1000	2017-10-02	1	266	750	2017-12-08	67	3240		2018-10-11	TAP	1000	2018-10-11	0	439	1000	2018-10-22	11	147.25
2017-10-14	BLO	1000	2017-10-16	2	269	1000	2017-12-08	53	2565		2017-10-14	BLB	1000	2017-10-16	2	270	800	2017-12-08	53	2745		2018-10-19	TAP	1000	2018-10-19	0	441	1000	2018-12-27	69	83.22
2017-10-22	BLO	1000	2017-10-23	1	274	1000	2017-12-08	46	2430		2017-10-22	BLB	1000	2017-10-23	1	275	1000	2017-12-08	46	2475		2019-01-04	TAP	1000	2019-01-04	0	462	1000	2019-01-15	11	56.24
2017-10-29	BLO	1000	2017-10-30	1	278	1000	2017-12-08	39	2475		2017-10-29	BLB	1000	2017-10-30	1	279	850	2017-12-08	39	2191.76		2019-02-11	TAP	1000	2019-02-11	0	477	1000	2019-02-11	0	56.05
2017-11-05	BLO	1000	2017-11-06	1	288	1000	2017-12-11	35	2029.5		2017-11-05	BLB	1000	2017-11-06	1	289	750	2017-12-11	35	3240		2019-05-16	TAP	1000	2019-05-16	0	509	1000	2019-06-04	19	255.55
2017-11-19	BLO	1000	2017-11-20	1	293	1000	2017-12-11	21	2430		2017-11-19	BLB	1000	2017-11-20	1	294	700	2017-12-11	21	3137.14		2019-06-28	TAP	1000	2019-06-28	0	537	1000	2019-07-29	31	51.965
2017-12-03	BLO	1000	2017-12-04	1	297	1000	2017-12-26	22	2079		2017-12-03	BLB	1000	2017-12-04	1	298	1000	2017-12-26	22	1836
2017-12-23	BLO	1000	2017-12-24	1	301	1000	2017-12-26	2	2101.5		2017-12-23	BLB	1000	2017-12-24	1	302	925	2017-12-26	2	2247.57
2018-02-25	BLO	1000	2018-02-26	1	311	1000	2018-03-28	30	2520		2018-02-25	BLB	1000	2018-02-26	1	312	800	2018-03-28	30	6405
2018-03-03	BLO	1000	2018-03-05	2	314	1000	2018-03-28	23	2655		2018-03-03	BLB	1000	2018-03-05	2	315	825	2018-03-30	25	3273
2018-03-18	BLO	1000	2018-03-19	1	327	1000	2018-03-30	11	3672		2018-03-18	BLB	1000	2018-03-19	1	328	1000	2018-03-30	11	7050
2018-03-25	BLO	1000	2018-03-26	1	331	1000	2018-03-30	4	3024		2018-03-25	BLB	1000	2018-03-26	1	332	1000	2018-03-30	4	3673
2018-04-01	BLO	1000	2018-04-02	1	335	1000	2018-06-14	73	2745.5		2018-04-01	BLB	1000	2018-04-02	1	336	425	2018-06-14	73	8449
2018-04-08	BLO	1000	2018-04-09	1	339	1000	2018-06-14	66	3429.5		2018-04-08	BLB	1000	2018-04-09	1	340	700	2018-06-14	66	5863
2018-04-22	BLO	1000	2018-04-23	1	345	1000	2018-06-15	53	4693		2018-04-22	BLB	1000	2018-04-23	1	346	750	2018-06-15	53	6067
2018-04-29	BLO	1000	2018-04-30	1	348	850	2018-06-15	46	5544		2018-04-29	BLB	1000	2018-04-30	1	349	250	2018-06-18	49	14668
2018-05-13	BLO	1000	2018-05-14	1	352	1000	2018-06-18	35	4132.5		2018-05-13	BLB	1000	2018-05-14	1	353	750	2018-06-18	35	6143.33
2018-05-20	BLO	1000	2018-05-21	1	355	1000	2018-06-18	28	4683.5		2018-05-20	BLB	1000	2018-05-21	1	356	750	2018-06-18	28	6840
2018-05-27	BLO	1000	2018-05-29	2	358	900	2018-06-19	21	4116.67		2018-05-27	BLB	1000	2018-05-29	2	359	700	2018-06-19	21	6704.29
2018-06-03	BLO	1000	2018-06-04	1	361	1000	2018-06-19	15	4940		2018-06-03	BLB	1000	2018-06-04	1	362	925	2018-06-19	15	5237.84
2018-06-17	BLO	1000	2018-06-18	1	367	1000	2018-08-17	60	3144.5		2018-06-17	BLB	1000	2018-06-18	1	368	700	2018-08-17	60	6650
2018-06-24	BLO	1000	2018-06-25	1	370	900	2018-08-17	53	5277.78		2018-06-24	BLB	1000	2018-06-25	1	371	625	2018-08-17	53	7387.2
2018-07-01	BLO	1000	2018-07-02	1	373	1000	2018-08-17	46	3277.5		2018-07-01	BLB	1000	2018-07-02	1	374	550	2018-08-17	46	7254.55
2018-07-08	BLO	1000	2018-07-09	1	375	800	2018-08-17	39	5878.12		2018-07-08	BLB	1000	2018-07-09	1	376	850	2018-08-17	39	5811.76
2018-07-29	BLO	1000	2018-07-30	1	380	600	2018-08-17	18	7505		2018-07-29	BLB	1000	2018-07-30	1	381	650	2018-08-23	24	7307.69
2018-08-05	BLO	1000	2018-08-06	1	383	800	2018-08-23	17	6293.75		2018-08-05	BLB	1000	2018-08-06	1	384	700	2018-08-23	17	8142.86
2018-08-12	BLO	1000	2018-08-13	1	388	800	2018-08-23	10	4334.38		2018-08-12	BLB	1000	2018-08-13	1	389	750	2018-09-04	22	7093.33
2018-08-20	BLO	1000	2018-08-22	2	392	1000	2018-09-04	13	3486.5		2018-08-20	BLB	1000	2018-08-22	2	393	900	2018-09-04	13	5267.22
2018-09-03	BLO	1000	2018-09-04	1	395	500	2018-09-04	0	6099		2018-09-03	BLB	1000	2018-09-04	1	396	750	2018-09-04	0	5370.67
2018-09-16	BLO	1000	2018-09-17	1	414	1000	2018-10-15	28	6023		2018-09-16	BLB	1000	2018-09-17	1	415	1000	2018-10-15	28	5035
2018-09-23	BLO	1000	2018-09-24	1	417	1000	2018-10-15	21	3486.5		2018-09-23	BLB	1000	2018-09-24	1	418	850	2018-10-15	21	3554.12
2018-09-30	BLO	1000	2018-10-01	1	432	1000	2018-10-22	21	4598		2018-09-30	BLB	1000	2018-10-01	1	433	1000	2018-10-22	21	4569.5
2018-10-07	BLO	1000	2018-10-08	1	436	1000	2018-10-22	14	2926		2018-10-07	BLB	1000	2018-10-08	1	437	900	2018-10-22	14	1878.89
2018-11-04	BLO	1000	2018-11-05	1	444	1000	2018-12-27	52	3543.5		2018-11-04	BLB	1000	2018-11-05	1	445	800	2018-12-27	52	3633.75
2018-11-11	BLO	1000	2018-11-12	1	447	1000	2018-12-27	45	1700.5		2018-11-11	BLB	1000	2018-11-12	1	448	800	2018-12-28	46	6768.75
2018-12-02	BLO	1000	2018-12-03	1	449	1000	2018-12-28	25	3391.5		2018-12-02	BLB	1000	2018-12-03	1	450	850	2018-12-28	25	6258.82
2018-12-16	BLO	1000	2018-12-18	2	454	1000	2018-12-28	10	3163.5		2018-12-16	BLB	1000	2018-12-18	2	455	1000	2018-12-28	10	1415.5
2018-12-31	BLO	1000	2019-01-01	1	458	1000	2019-01-15	14	3059		2018-12-31	BLB	1000	2019-01-01	1	459	850	2019-01-15	14	4090.59
2019-01-13	BLO	1000	2019-01-14	1	465	1000	2019-01-25	11	4940		2019-01-13	BLB	1000	2019-01-14	1	466	950	2019-01-25	11	3960
2019-01-21	BLO	1000	2019-01-23	2	468	500	2019-01-25	2	4446		2019-01-21	BLB	1000	2019-01-23	2	469	900	2019-01-25	2	3018.89
2019-02-10	BLO	1000	2019-02-11	1	475	1000	2019-02-11	0	2071		2019-02-10	BLB	1000	2019-02-11	1	476	800	2019-02-11	0	2648.12
2019-02-17	BLO	1000	2019-02-18	1	479	1000	2019-04-12	53	2983		2019-02-17	BLB	1000	2019-02-18	1	480	750	2019-04-12	53	3470.67
2019-02-24	BLO	1000	2019-02-25	1	482	1000	2019-04-12	46	2413		2019-02-24	BLB	1000	2019-02-25	1	483	500	2019-04-12	46	3819
2019-03-10	BLO	1000	2019-03-11	1	487	600	2019-04-15	35	5288.33		2019-03-10	BLB	1000	2019-03-11	1	488	875	2019-04-15	35	4321.14
2019-03-31	BLO	1000	2019-04-01	1	490	1000	2019-04-15	14	4940		2019-03-31	BLB	1000	2019-04-01	1	491	750	2019-04-15	14	5940.67

## Sheet: Table 5 MiSeq lbrys field
Table 5. MiSeq libraries field samples
OCEAN											BAY
MiSeq run	site number	site name	date	primer name	library	bony fish reads	bony fish species	cartilaginous fish reads	cartilaginous fish species		MiSeq run	site number	site name	date	primer name	library	bony fish reads	bony fish species	cartilaginous fish reads	cartilaginous fish species
2017 06 jun-96	1	BLO	2017-04-02	AFAR	aq195Ajun2017	4850	2	0	0		2017 06 jun-96	2	BLB	2017-04-02	AFAR	aq196Ajun2017	3612	1	0	0
2017 06 jun-96	1	BLO	2017-04-16	AFAR	aq202Ajun2017	4705	2	0	0		2017 06 jun-96	2	BLB	2017-04-16	AFAR	aq203Ajun2017	28660	6	0	0
2017 06 jun-96	1	BLO	2017-04-23	AFAR	aq207Ajun2017	1582	3	0	0		2017 06 jun-96	2	BLB	2017-04-23	AFAR	aq208Ajun2017	26988	5	0	0
2017 06 jun-96	1	BLO	2017-05-14	AFAR	aq218Ajun2017	13075	8	0	0		2017 06 jun-96	2	BLB	2017-05-14	AFAR	aq219Ajun2017	112741	6	0	0
2017 06 jun-96	1	BLO	2017-05-29	AFAR	aq226Ajun2017	15587	10	0	0		2017 06 jun-96	2	BLB	2017-05-29	AFAR	aq227Ajun2017	139328	8	0	0
2017 11 nov-92	1	BLO	2017-06-11	AFAR	aq233AFAR20oct2017	30993	15	0	0		2017 11 nov-92	2	BLB	2017-06-11	AFAR	aq234AFAR20oct2017	1832	6	0	0
2017 11 nov-92	1	BLO	2017-07-03	AFAR	aq239AFAR20oct2017	8519	6	0	0		2017 11 nov-92	2	BLB	2017-07-03	AFAR	aq240AFAR20oct2017	43474	13	0	0
2017 11 nov-92	1	BLO	2017-07-09	AFAR	aq243AFAR20oct2017	21789	12	113	1		2017 11 nov-92	2	BLB	2017-07-09	AFAR	aq244AFAR20oct2017	38138	14	0	0
2017 11 nov-92	1	BLO	2017-07-23	AFAR	aq247AFAR20oct2017	13024	10	6	1		2017 11 nov-92	2	BLB	2017-07-23	AFAR	aq248AFS20oct2017	74755	16	1485	1
2017 11 nov-92	1	BLO	2017-08-06	AFAR	aq253AFAR20oct2017	8301	14	0	0		2017 11 nov-92	2	BLB	2017-08-06	AFAR	aq254AFAR20oct2017	52210	16	219	1
2017 11 nov-92	1	BLO	2017-08-27	AFAR	aq255AFAR20oct2017	13076	13	0	0		2017 11 nov-92	2	BLB	2017-08-27	AFAR	aq256AFAR20oct2017	67965	21	419	1
2017 11 nov-92	1	BLO	2017-09-04	AFAR	aq257AFAR20oct2017	23561	13	0	0		2017 11 nov-92	2	BLB	2017-09-04	AFAR	aq258AFAR20oct2017	44061	16	0	0
2017 11 nov-92	1	BLO	2017-09-10	AFAR	aq259AFAR20oct2017	16814	12	0	0		2017 11 nov-92	2	BLB	2017-09-10	AFAR	aq260AFAR20oct2017	188266	18	0	0
2017 11 nov-92	1	BLO	2017-09-17	AFAR	aq261AFAR20oct2017	19677	14	0	0		2017 11 nov-92	2	BLB	2017-09-17	AFAR	aq262AFAR20oct2017	69530	20	0	0
2018 01 jan-86	1	BLO	2017-10-01	AFAR	265AFAR26jan2018	118532	17	0	0		2018 01 jan-86	2	BLB	2017-10-01	AFAR	266AFAR26jan2018	67285	15	0	0
2018 01 jan-86	1	BLO	2017-10-14	AFAR	269AFAR26jan2018	39121	27	0	0		2018 01 jan-86	2	BLB	2017-10-14	AFAR	270AFAR26jan2018	75450	13	0	0
2018 01 jan-86	1	BLO	2017-10-22	AFAR	274AFAR26jan2018	48166	11	0	0		2018 01 jan-86	2	BLB	2017-10-22	AFAR	275AFAR26jan2018	108915	20	0	0
2018 01 jan-86	1	BLO	2017-10-29	AFAR	278AFAR26jan2018	78909	16	7	1		2018 01 jan-86	2	BLB	2017-10-29	AFAR	279AFAR26jan2018	121336	18	0	0
2018 01 jan-86	1	BLO	2017-11-05	AFAR	288AFAR26jan2018	95986	19	565	1		2018 01 jan-86	2	BLB	2017-11-05	AFAR	289AFAR26jan2018	149654	15	0	0
2018 01 jan-86	1	BLO	2017-11-19	AFAR	293AFAR26jan2018	50836	14	372	2		2018 01 jan-86	2	BLB	2017-11-19	AFAR	294AFAR26jan2018	34609	11	0	0
2018 01 jan-86	1	BLO	2017-12-03	AFAR	297AFAR26jan2018	78230	6	0	0		2018 01 jan-86	2	BLB	2017-12-03	AFAR	298AFAR26jan2018	26819	8	0	0
2018 01 jan-86	1	BLO	2017-12-23	AFAR	301AFAR26jan2018	56469	10	0	0		2018 01 jan-86	2	BLB	2017-12-23	AFAR	302AFAR26jan2018	75162	16	0	0
2018 06 jun-92	1	BLO	2018-02-25	AFAR	311AFARjun2018	36782	6	0	0		2018 06 jun-92	2	BLB	2018-02-25	AFAR	312AFARjun2018	54174	6	0	0
2018 06 jun-92	1	BLO	2018-03-03	AFAR	314AFARjun2018	63021	7	0	0		2018 06 jun-92	2	BLB	2018-03-03	AFAR	315AFARjun2018	9348	6	0	0
2018 06 jun-92	1	BLO	2018-03-18	AFAR	327AFARjun2018	1199	1	0	0		2018 06 jun-92	2	BLB	2018-03-18	AFAR	328AFARjun2018	14681	4	0	0
2018 06 jun-92	1	BLO	2018-03-25	AFAR	331AFARjun2018	24731	13	0	0		2018 06 jun-92	2	BLB	2018-03-25	AFAR	332AFARjun2018	4221	5	0	0
2018 09 sep-96	1	BLO	2018-04-01	AFAR	335AFARsep2018	3051	3	2426	1		2018 09 sep	2	BLB	2018-04-01	AFAR	336AFARsep2018	67616	5	0	0
2018 09 sep-96	1	BLO	2018-04-08	AFAR	339AFARsep2018	11795	5	0	0		2018 09 sep	2	BLB	2018-04-08	AFAR	340AFARsep2018	7631	4	0	0
2018 09 sep-96	1	BLO	2018-04-22	AFAR	345AFARsep2018	19544	6	0	0		2018 09 sep	2	BLB	2018-04-22	AFAR	346AFARsep2018	82040	5	0	0
2018 09 sep-96	1	BLO	2018-04-29	AFAR	348AFARsep2018	1415	8	0	0		2018 09 sep	2	BLB	2018-04-29	AFAR	349AFARsep2018	38370	5	0	0
2018 09 sep-96	1	BLO	2018-05-13	AFAR	352AFARsep2018	9090	5	0	0		2018 09 sep	2	BLB	2018-05-13	AFAR	353AFARsep2018	28455	10	0	0
2018 09 sep-96	1	BLO	2018-05-20	AFAR	355AFARsep2018	22799	11	0	0		2018 09 sep	2	BLB	2018-05-20	AFAR	356AFARsep2018	93380	6	0	0
2018 09 sep-96	1	BLO	2018-05-27	AFAR	358AFARsep2018	164826	11	148	1		2018 09 sep	2	BLB	2018-05-27	AFAR	359AFARsep2018	378106	10	0	0
2018 09 sep-96	1	BLO	2018-06-03	AFAR	361AFARsep2018	11068	7	0	0		2018 09 sep	2	BLB	2018-06-03	AFAR	362AFARsep2018	108053	12	0	0
2018 10 oct-96	1	BLO	2018-06-17	AFAR	367AFARoct2018	7286	10	0	0		2018 10 oct-96	2	BLB	2018-06-17	AFAR	368AFARoct2018	32183	9	0	0
2018 10 oct-96	1	BLO	2018-06-24	AFAR	370AFARoct2018	193911	17	0	0		2018 10 oct-96	2	BLB	2018-06-24	AFAR	371AFARoct2018	74411	6	0	0
2018 10 oct-96	1	BLO	2018-07-01	AFAR	373AFARoct2018	79824	11	47	1		2018 10 oct-96	2	BLB	2018-07-01	AFAR	374AFARoct2018	221199	15	26	1
2018 10 oct-96	1	BLO	2018-07-08	AFAR	375AFARoct2018	28419	12	31	1		2018 10 oct-96	2	BLB	2018-07-08	AFAR	376AFARoct2018	133525	18	0	0
2018 10 oct-96	1	BLO	2018-07-29	AFAR	380AFARoct2018	23447	10	6	1		2018 10 oct-96	2	BLB	2018-07-29	AFAR	381AFARoct2018	129718	13	6	1
2018 10 oct-96	1	BLO	2018-08-05	AFAR	383AFARoct2018	183473	9	154	1		2018 10 oct-96	2	BLB	2018-08-05	AFAR	384AFARoct2018	22037	13	0	0
2018 10 oct-96	1	BLO	2018-08-12	AFAR	388AFARoct2018	63899	15	82	2		2018 10 oct-96	2	BLB	2018-08-12	AFAR	389AFARoct2018	263816	22	0	0
2019 02 feb-96	1	BLO	2018-08-20	AFAR	392AFARfeb2019	30660	10	33	1		2018 10 oct-96	2	BLB	2018-08-20	AFAR	393AFARoct2018	118709	22	0	0
2018 10 oct-96	1	BLO	2018-09-03	AFAR	395AFARoct2018	64407	7	0	0		2018 10 oct-96	2	BLB	2018-09-03	AFAR	396AFARoct2018	193587	23	0	0
2018 11 nov-96	1	BLO	2018-09-16	AFAR	414AFARnov2018	30730	9	0	0		2018 11 nov	2	BLB	2018-09-16	AFAR	415AFARnov2018	126361	20	0	0
2018 11 nov-96	1	BLO	2018-09-23	AFAR	417AFARnov2018	23393	17	0	0		2018 11 nov	2	BLB	2018-09-23	AFAR	418AFARnov2018	172942	16	0	0
2018 11 nov-96	1	BLO	2018-09-30	AFAR	432AFARnov2018	66740	15	0	0		2018 11 nov	2	BLB	2018-09-30	AFAR	433AFARnov2018	188800	19	0	0
2018 11 nov-96	1	BLO	2018-10-07	AFAR	436AFARnov2018	37822	16	0	0		2018 11 nov	2	BLB	2018-10-07	AFAR	437AFARnov2018	207474	19	0	0
2019 02 feb-96	1	BLO	2018-11-04	AFAR	444AFARfeb2019	69634	12	0	0		2019 02 feb-96	2	BLB	2018-11-04	AFAR	445AFARfeb2019	82010	11	0	0
2019 02 feb-96	1	BLO	2018-11-11	AFAR	447AFARfeb2019	12991	6	0	0		2019 02 feb-96	2	BLB	2018-11-11	AFAR	448AFARfeb2019	120071	15	0	0
2019 02 feb-96	1	BLO	2018-12-02	AFAR	449AFARfeb2019	220164	12	0	0		2019 02 feb-96	2	BLB	2018-12-02	AFAR	450AFARfeb2019	13482	3	0	0
2019 02 feb-96	1	BLO	2018-12-16	AFAR	454AFARafeb2019	126122	10	0	0		2019 02 feb-96	2	BLB	2018-12-16	AFAR	455AFARfeb2019	12776	9	0	0
2019 02 feb-96	1	BLO	2018-12-31	AFAR	458AFARfeb2019	50305	8	0	0		2019 02 feb-96	2	BLB	2018-12-31	AFAR	459AFARfeb2019	9509	4	0	0
2019 03mar-96	1	BLO	2019-01-13	AFAR	465AFAR	17899	12	0	0		2019 03mar-96	2	BLB	2019-01-13	AFAR	466AFAR	57712	10	0	0
2019 03mar-96	1	BLO	2019-01-21	AFAR	468AFAR	16930	2	0	0		2019 03mar-96	2	BLB	2019-01-21	AFAR	469AFAR	35725	8	0	0
2019 03mar-96	1	BLO	2019-02-10	AFAR	475AFAR	8317	2	0	0		2019 05 may-96	2	BLB	2019-02-10	AFAR	476AFAR-may2019	46999	5	0	0
2019 05 may-96	1	BLO	2019-02-17	AFAR	479AFAR-may2019	5038	5	0	0		2019 05 may-96	2	BLB	2019-02-17	AFAR	480AFAR-may2019	2795	1	0	0
2019 05 may-96	1	BLO	2019-02-24	AFAR	482AFAR-may2019	32559	12	0	0		2019 06 jun-96	2	BLB	2019-02-24	AFAR	483AFAR-G-jun2019	17089	3	0	0
2019 06 jun-96	1	BLO	2019-03-10	AFAR	487AFAR-G-jun2019	2941	3	0	0		2019 06 jun-96	2	BLB	2019-03-10	AFAR	488AFAR-G-jun2019	3411	5	0	0
2019 06 jun-96	1	BLO	2019-03-31	AFAR	490AFAR-G-jun2019	194	1	0	0		2019 06 jun-96	2	BLB	2019-03-31	AFAR	491AFAR-G-jun2019	4542	3	0	0
2017 06 jun-96	1	BLO	2017-04-02	AFS	aq195Bjun2017	0	0	0	0		2017 06 jun-96	2	BLB	2017-04-02	AFS	aq196Bjun2017	0	0	0	0
2017 06 jun-96	1	BLO	2017-04-16	AFS	aq202Bjun2017	0	0	1027	2		2017 06 jun-96	2	BLB	2017-04-16	AFS	aq203Bjun2017	0	0	0	0
2017 06 jun-96	1	BLO	2017-04-23	AFS	aq207Bjun2017	0	0	0	0		2017 06 jun-96	2	BLB	2017-04-23	AFS	aq208Bjun2017	0	0	0	0
2017 06 jun-96	1	BLO	2017-05-14	AFS	aq218Bjun2017	0	0	8431	1		2017 06 jun-96	2	BLB	2017-05-14	AFS	aq219Bjun2017	0	0	0	0
2017 06 jun-96	1	BLO	2017-05-29	AFS	aq226Bjun2017	0	0	2159	2		2017 06 jun-96	2	BLB	2017-05-29	AFS	aq227Bjun2017	578	1	12	1
2017 11 nov-92	1	BLO	2017-06-11	AFS	aq233AFS20oct2017	21516	8	11055	4		2017 11 nov-92	2	BLB	2017-06-11	AFS	aq234AFS20oct2017	21155	5	104	1
2017 11 nov-92	1	BLO	2017-07-03	AFS	aq239AFS20oct2017	2115	3	4966	2		2017 11 nov-92	2	BLB	2017-07-03	AFS	aq240AFS20oct2017	85228	15	435	1
2017 11 nov-92	1	BLO	2017-07-09	AFS	aq243AFS20oct2017	14199	10	4626	2		2017 11 nov-92	2	BLB	2017-07-09	AFS	aq244AFS20oct2017	101594	11	2828	2
2017 11 nov-92	1	BLO	2017-07-23	AFS	aq247AFS20oct2017	16234	10	4393	6		2017 11 nov-92	2	BLB	2017-07-23	AFS	aq248AFAR20oct2017	253431	17	0	0
2017 11 nov-92	1	BLO	2017-08-06	AFS	aq253AFS20oct2017	30917	9	18897	4		2017 11 nov-92	2	BLB	2017-08-06	AFS	aq254AFS20oct2017	110667	14	10400	1
2017 11 nov-92	1	BLO	2017-08-27	AFS	aq255AFS20oct2017	80633	12	2804	2		2017 11 nov-92	2	BLB	2017-08-27	AFS	aq256AFS20oct2017	74206	20	101564	2
2017 11 nov-92	1	BLO	2017-09-04	AFS	aq257AFS20oct2017	76777	10	14119	7		2017 11 nov-92	2	BLB	2017-09-04	AFS	aq258AFS20oct2017	138930	13	0	0
2017 11 nov-92	1	BLO	2017-09-10	AFS	aq259AFS20oct2017	63538	12	2774	3		2017 11 nov-92	2	BLB	2017-09-10	AFS	aq260AFS20oct2017	182842	19	0	0
2017 11 nov-92	1	BLO	2017-09-17	AFS	aq261AFS20oct2017	28072	11	36353	5		2017 11 nov-92	2	BLB	2017-09-17	AFS	aq262AFS20oct2017	0	0	0	0
2018 01 jan-86	1	BLO	2017-10-01	AFS	265AFS26jan2018	60399	14	1439	3		2018 01 jan-86	2	BLB	2017-10-01	AFS	266AFS26jan2018	45201	11	0	0
2018 01 jan-86	1	BLO	2017-10-14	AFS	269AFS26jan2018	54043	20	761	1		2018 01 jan-86	2	BLB	2017-10-14	AFS	270AFS26jan2018	48634	18	0	0
2018 01 jan-86	1	BLO	2017-10-22	AFS	274AFS26jan2018	31019	12	0	0		2018 01 jan-86	2	BLB	2017-10-22	AFS	275AFS26jan2018	83890	18	0	0
2018 01 jan-86	1	BLO	2017-10-29	AFS	278AFS26jan2018	22080	19	1616	3		2018 01 jan-86	2	BLB	2017-10-29	AFS	279AFS26jan2018	67708	17	0	0
2018 01 jan-86	1	BLO	2017-11-05	AFS	288AFS26jan2018	42150	20	1656	2		2018 01 jan-86	2	BLB	2017-11-05	AFS	289AFS26jan2018	72559	14	0	0
2018 01 jan-86	1	BLO	2017-11-19	AFS	293AFS26jan2018	45951	12	8037	2		2018 01 jan-86	2	BLB	2017-11-19	AFS	294AFS26jan2018	40173	10	0	0
2018 01 jan-86	1	BLO	2017-12-03	AFS	297AFS26jan2018	51755	6	3725	1		2018 01 jan-86	2	BLB	2017-12-03	AFS	298AFS26jan2018	54696	8	0	0
2018 01 jan-86	1	BLO	2017-12-23	AFS	301AFS26jan2018	22443	8	3520	1		2018 01 jan-86	2	BLB	2017-12-23	AFS	302AFS26jan2018	34627	13	897	1
2018 06 jun-92	1	BLO	2018-02-25	AFS	311AFSjun2018	4167	5	0	0		2018 06 jun-92	2	BLB	2018-02-25	AFS	312AFSjun2018	11717	3	0	0
2018 06 jun-92	1	BLO	2018-03-03	AFS	314AFSjun2018	2697	8	120	1		2018 06 jun-92	2	BLB	2018-03-03	AFS	315AFSjun2018	1057	3	0	0
2018 06 jun-92	1	BLO	2018-03-18	AFS	327AFSjun2018	272	2	1209	1		2018 06 jun-92	2	BLB	2018-03-18	AFS	328AFSjun2018	2419	3	0	0
2018 06 jun-92	1	BLO	2018-03-25	AFS	331AFSjun2018	13474	12	4165	2		2018 06 jun-92	2	BLB	2018-03-25	AFS	332AFSjun2018	2422	3	690	1
2018 09 sep	1	BLO	2018-04-01	AFS	335AFSsep2018	2853	3	132905	1		2018 09 sep	2	BLB	2018-04-01	AFS	336AFSsep2018	14988	5	0	0
2018 09 sep	1	BLO	2018-04-08	AFS	339AFSsep2018	3638	7	218	1		2018 09 sep	2	BLB	2018-04-08	AFS	340AFSsep2018	4264	6	0	0
2018 09 sep	1	BLO	2018-04-22	AFS	345AFSsep2018	2756	3	871	1		2018 09 sep	2	BLB	2018-04-22	AFS	346AFSsep2018	29318	7	0	0
2018 09 sep	1	BLO	2018-04-29	AFS	348AFSsep2018	8202	4	421	1		2018 09 sep	2	BLB	2018-04-29	AFS	349AFSsep2018	13259	5	0	0
2018 09 sep	1	BLO	2018-05-13	AFS	352AFSsep2018	1784	4	0	0		2018 09 sep	2	BLB	2018-05-13	AFS	353AFSsep2018	6785	9	32	1
2018 09 sep	1	BLO	2018-05-20	AFS	355AFSsep2018	2050	8	136	2		2018 09 sep	2	BLB	2018-05-20	AFS	356AFSsep2018	10538	5	0	0
2018 09 sep	1	BLO	2018-05-27	AFS	358AFSsep2018	75077	16	5532	2		2018 10 oct-96	2	BLB	2018-05-27	AFS	359AFSoct2018	173006	7	588	2
2018 10 oct-96	1	BLO	2018-06-03	AFS	361AFSoct2018	1773	6	0	0		2018 10 oct-96	2	BLB	2018-06-03	AFS	362AFSoct2018	10254	4	25	1
2018 10 oct-96	1	BLO	2018-06-17	AFS	367AFSoct2018	2777	6	1648	4		2018 10 oct-96	2	BLB	2018-06-17	AFS	368AFSoct2018	25172	7	287	1
2018 10 oct-96	1	BLO	2018-06-24	AFS	370AFSoct2018	35984	8	2950	7		2018 10 oct-96	2	BLB	2018-06-24	AFS	371AFSoct2018	35496	9	0	0
2018 10 oct-96	1	BLO	2018-07-01	AFS	373AFSoct2018	77944	14	5788	5		2018 10 oct-96	2	BLB	2018-07-01	AFS	374AFSoct2018	129852	14	333	1
2018 10 oct-96	1	BLO	2018-07-08	AFS	375AFSoct2018	4118	6	27437	7		2018 10 oct-96	2	BLB	2018-07-08	AFS	376AFSoct2018	14295	10	0	0
2018 10 oct-96	1	BLO	2018-07-29	AFS	380AFSoct2018	2069	7	1588	4		2018 10 oct-96	2	BLB	2018-07-29	AFS	381AFSoct2018	48405	9	3903	2
2018 10 oct-96	1	BLO	2018-08-05	AFS	383AFSoct2018	38060	10	9526	4		2018 10 oct-96	2	BLB	2018-08-05	AFS	384AFSoct2018	8556	9	0	0
2018 10 oct-96	1	BLO	2018-08-12	AFS	388AFSoct2018	32823	13	5191	2		2018 10 oct-96	2	BLB	2018-08-12	AFS	389AFSoct2018	123939	19	748	2
2019 02 feb-96	1	BLO	2018-08-20	AFS	392AFSfeb2019	3387	7	2028	3		2018 10 oct-96	2	BLB	2018-08-20	AFS	393AFSoct2018	90279	19	285	1
2018 11 nov	1	BLO	2018-09-03	AFS	395AFSnov2018	4701	6	2448	3		2018 11 nov	2	BLB	2018-09-03	AFS	396AFSnov2018	216454	26	422	1
2018 11 nov	1	BLO	2018-09-16	AFS	414AFSnov2018	5130	8	1244	4		2018 11 nov	2	BLB	2018-09-16	AFS	415AFSnov2018	20515	16	48	1
2018 11 nov	1	BLO	2018-09-23	AFS	417AFSnov2018	7974	12	283	1		2018 11 nov	2	BLB	2018-09-23	AFS	418AFSnov2018	106536	17	133	1
2018 11 nov	1	BLO	2018-09-30	AFS	432AFSnov2018	21508	10	275	1		2018 11 nov	2	BLB	2018-09-30	AFS	433AFSnov2018	68865	19	274	1
2018 11 nov	1	BLO	2018-10-07	AFS	436AFSnov2018	8844	14	569	4		2018 11 nov	2	BLB	2018-10-07	AFS	437AFSnov2018	160330	17	0	0
2019 02 feb-96	1	BLO	2018-11-04	AFS	444AFSfeb2019	54447	10	504	1		2019 02 feb-96	2	BLB	2018-11-04	AFS	445AFSfeb2019	74443	12	0	0
2019 02 feb-96	1	BLO	2018-11-11	AFS	447AFSfeb2019	4933	6	3356	1		2019 02 feb-96	2	BLB	2018-11-11	AFS	448AFSfeb2019	83509	12	0	0
2019 02 feb-96	1	BLO	2018-12-02	AFS	449AFSfeb2019	69045	9	1825	2		2019 02 feb-96	2	BLB	2018-12-02	AFS	450AFSfeb2019	1467	5	0	0
2019 02 feb-96	1	BLO	2018-12-16	AFS	454AFSfeb2019	99563	6	2390	1		2019 02 feb-96	2	BLB	2018-12-16	AFS	455AFSfeb2019	22059	6	0	0
2019 02 feb-96	1	BLO	2018-12-31	AFS	458AFSfeb2019	10189	4	768	1		2019 03mar-96	2	BLB	2019-01-13	AFS	466AFS	90127	9	0	0
2019 03mar-96	1	BLO	2019-01-13	AFS	465AFS	13249	9	0	0		2019 03mar-96	2	BLB	2019-01-21	AFS	469AFS	7605	8	0	0
2019 03mar-96	1	BLO	2019-01-21	AFS	468AFS	6310	3	1555	1		2019 02 feb-96	2	BLB	2019-12-31	AFS	459AFSfeb2019	3013	1	0	0
2019 05 may-96	1	BLO	2019-02-10	AFS	475AFS-may2019	0	0	0	0		2019 05 may-96	2	BLB	2019-02-10	AFS	476AFS-may2019	9112	7	0	0
2019 05 may-96	1	BLO	2019-02-17	AFS	479AFS-may2019	1752	3	0	0		2019 05 may-96	2	BLB	2019-02-17	AFS	480AFS-may2019	325	1	0	0
2019 06 jun-96	1	BLO	2019-02-24	AFS	482AFS-G-jun2019	9289	8	2113	1		2019 06 jun-96	2	BLB	2019-02-24	AFS	483AFS-G-jun2019	0	0	0	0
2019 06 jun-96	1	BLO	2019-03-10	AFS	487AFS-G-jun2019	0	0	45	2		2019 06 jun-96	2	BLB	2019-03-10	AFS	488AFS-G-jun2019	96	1	0	0
2019 08 aug-96	1	BLO	2019-03-31	AFS	490AFS-Taug2019	146	1	7620	2		2019 08 aug-96	2	BLB	2019-03-31	AFS	491AFS-Taug2019	543	2	0	0

## Sheet: Table 6 MiSeq lbrys neg cont
Table 6. MISEQ libraries negative controls
TAP WATER DNA											H2O
MiSeq run	site number	site name	date	primer name	library	bony fish reads	bony fish species	cartilaginous fish reads	cartilaginous fish species		MiSeq run	site number	site name	date	primer name	library	bony fish reads	bony fish species	cartilaginous fish reads	cartilaginous fish species
2017 06 jun-96	91	TAP	2017-05-15	AFAR	aq217Ajun2017	0	0	0	0		2017 06 jun-96	92	H2O		AFAR	aqC21Ajun2017	0	0	0	0
2017 06 jun-96	91	TAP	2017-05-24	AFAR	aq223Ajun2017	0	0	0	0		2017 06 jun-96	92	H2O		AFAR	aqC22Ajun2017	0	0	0	0
2017 06 jun-96	91	TAP	2017-06-01	AFAR	aq230Ajun2017	0	0	0	0		2017 06 jun-96	92	H2O		AFAR	aqC25Ajun2017	0	0	0	0
2017 11 nov-92	91	TAP	2017-05-24	AFAR	aq223AFAR20oct2017	0	0	0	0		2017 06 jun-96	92	H2O		AFAR	aqC26Ajun2017	0	0	0	0
2017 11 nov-92	91	TAP	2017-06-01	AFAR	aq230AFAR20oct2017	0	0	0	0		2017 06 jun-96	92	H2O		AFAR	aqC29Ajun2017	0	0	0	0
2018 01 jan-86	91	TAP	2017-10-20	AFAR	272AFAR26jan2018	0	0	0	0		2017 06 jun-96	92	H2O		AFAR	aqC30Ajun2017	0	0	0	0
2018 01 jan-86	91	TAP	2017-10-26	AFAR	277AFAR26jan2018	0	0	0	0		2017 06 jun-96	92	H2O		AFAR	aqC33Ajun2017	0	0	0	0
2018 01 jan-86	91	TAP	2017-11-02	AFAR	287AFAR26jan2018	0	0	0	0		2017 06 jun-96	92	H2O		AFAR	aqC34Ajun2017	0	0	0	0
2018 01 jan-86	91	TAP	2017-11-09	AFAR	291AFAR26jan2018	0	0	0	0		2017 11 nov-92	92	H20		AFAR	aqC44AFAR20oct2017	0	0	0	0
2018 06 jun-92	91	tap		AFAR	277eAFARjun2018	0	0	0	0		2017 11 nov-92	92	H20		AFAR	aqC45AFAR20oct2017	0	0	0	0
2018 06 jun-92	91	tap		AFAR	287cAFARjun2018	0	0	0	0		2018 01 jan-86	92	H2O		AFAR	H2OAFAR26jan2018	0	0	0	0
2018 06 jun-92	91	tap		AFAR	291aAFARjun2018	0	0	0	0		2018 01 jan-86	92	H2O		AFAR	H2OAFAR26jan2018-1	0	0	0	0
2018 09 sep	91	TAP	2018-04-06	AFAR	338AFARsep2018	0	0	0	0		2018 01 jan-86	92	H2O		AFAR	H2OAFAR26jan2018-2	0	0	0	0
2018 09 sep	91	TAP	2018-04-13	AFAR	342AFARsep2018	0	0	0	0		2018 06 jun-92	92	H2O		AFAR	H2O3AFARjun2018	0	0	0	0
2018 10 oct-96	91	TAP	2018-04-20	AFAR	344AFARoct2018	0	0	0	0		2018 06 jun-92	92	H2O		AFAR	H2O5AFARjun2018	0	0	0	0
2018 10 oct-96	91	TAP	2018-06-07	AFAR	364AFARoct2018	0	0	0	0		2018 09 sep	92	H2O		AFAR	H2OAFARsep2018	0	0	0	0
2018 10 oct-96	91	TAP	2018-08-17	AFAR	391AFARoct2018	0	0	0	0		2018 09 sep	92	H2O		AFAR	H2OAFARsep2018-1	0	0	0	0
2018 11 nov	91	TAP	2018-10-05	AFAR	435AFARbnov2018	0	0	0	0		2018 10 oct-96	92	H2O		AFAR	H2ObAFARoct2018	0	0	0	0
2018 11 nov	91	TAP	2018-10-11	AFAR	439AFAR1dnov2018	0	0	0	0		2018 10 oct-96	92	H2O		AFAR	H2OeAFARoct2018	0	0	0	0
2019 02 feb-96	91	TAP	2018-10-19	AFAR	441AFARfeb2019	0	0	0	0		2018 11 nov	92	H2O		AFAR	H2OAFAR2dnov2018	0	0	0	0
2019 02 feb-96	91	TAP	2019-01-04	AFAR	462AFARfeb2019	0	0	0	0		2018 11 nov	92	H2O		AFAR	H2OAFARbnov2018	0	0	0	0
2019 03mar-96	91	TAP	2019-01-04	AFAR	462TAPaAFAR	0	0	0	0		2018 11 nov	92	H2O		AFAR	H2OAFARfnov2018	0	0	0	0
2019 03mar-96	91	TAP	2019-02-11	AFAR	477TAPaAFAR	0	0	0	0		2019 02 feb-96	92	H2O		AFAR	H2OaAFARfeb2019	0	0	0	0
2019 03mar-96	91	TAP	2019-02-11	AFAR	477TAPbAFAR	0	0	0	0		2019 02 feb-96	92	H2O		AFAR	H2OeAFARfeb2019	0	0	0	0
2019 05 may-96	91	TAP		AFAR	477TAP-02-AFAR-may2019	0	0	0	0		2019 03mar-96	92	H2O		AFAR	H2ObAFAR	0	0	0	0
2019 06 jun-96	91	TAP		AFAR	441TAP-03AFAR-G-jun2019	0	0	0	0		2019 03mar-96	92	H2O		AFAR	H2OcAFAR	0	0	0	0
2019 06 jun-96	91	TAP		AFAR	441TAP-03AFAR-T-jun2019	0	0	0	0		2019 03mar-96	92	H2O		AFAR	H2OeAFAR	0	0	0	0
2019 06 jun-96	91	TAP		AFAR	462TAP-03AFAR-G-jun2019	0	0	0	0		2019 05 may-96	92	H2O		AFAR	H2O-02-AFAR-may2019	0	0	0	0
2019 06 jun-96	91	TAP		AFAR	462TAP-03AFAR-T-jun2019	0	0	0	0		2019 06 jun-96	92	H2O		AFAR	H2O-02AFAR-G-jun2019	0	0	0	0
2019 06 jun-96	91	TAP		AFAR	477TAP-04AFAR-G-jun2019	0	0	0	0		2019 06 jun-96	92	H2O		AFAR	H2O-03AFAR-T-jun2019	0	0	0	0
2019 06 jun-96	91	TAP		AFAR	477TAP-04AFAR-T-jun2019	0	0	0	0		2019 06 jun-96	92	H2O		AFAR	H2O-06AFAR-T-jun2019	0	0	0	0
2019 08 aug-96	91	TAP	2019-05-16	AFAR	509-TAP-02AFAR-Taug2019	0	0	0	0		2019 06 jun-96	92	H2O		AFAR	H2O-07AFAR-G-jun2019	0	0	0	0
2019 08 aug-96	91	TAP	2019-05-16	AFAR	509-TAP-03AFAR-Taug2019	0	0	0	0		2019 06 jun-96	92	H2O		AFAR	H2O-07AFAR-T-jun2019	0	0	0	0
2019 08 aug-96	91	TAP	2019-06-28	AFAR	537-TAP-04AFAR-Taug2019	0	0	0	0		2019 08 aug-96	92	H2O		AFAR	H2O-01AFAR-Taug2019	0	0	0	0
2017 06 jun-96	91	TAP	2017-05-15	AFS	aq217Bjun2017	0	0	0	0		2019 08 aug-96	92	H2O		AFAR	H2O-03AFAR-Taug2019	0	0	0	0
2017 06 jun-96	91	TAP	2017-05-24	AFS	aq223Bjun2017	0	0	0	0		2019 08 aug-96	92	H2O		AFAR	H2O-04AFAR-Taug2019	0	0	0	0
2017 06 jun-96	91	TAP	2017-06-01	AFS	aq230Bjun2017	0	0	0	0		2019 08 aug-96	92	H2O		AFAR	H2O-05AFAR-Taug2019	0	0	0	0
2017 11 nov-92	91	TAP	2017-05-15	AFS	aq217AFS20oct2017	0	0	0	0		2017 06 jun-96	92	H2O		AFS	aqC23Bjun2017	0	0	0	0
2017 11 nov-92	91	TAP	2017-05-24	AFS	aq223AFS20oct2017	0	0	0	0		2017 06 jun-96	92	H2O		AFS	aqC24Bjun2017	0	0	0	0
2017 11 nov-92	91	TAP	2017-06-01	AFS	aq230AFS20oct2017	0	0	0	0		2017 06 jun-96	92	H2O		AFS	aqC27Bjun2017	0	0	0	0
2017 11 nov-92	91	TAP	2017-05-15	AFS	aq217SAT20oct2017	0	0	0	0		2017 06 jun-96	92	H2O		AFS	aqC28Bjun2017	0	0	0	0
2017 11 nov-92	91	TAP	2017-05-24	AFS	aq223SAT20oct2017	0	0	0	0		2017 06 jun-96	92	H2O		AFS	aqC31Bjun2017	0	0	0	0
2017 11 nov-92	91	TAP	2017-06-01	AFS	aq230SAT20oct2017	0	0	0	0		2017 06 jun-96	92	H2O		AFS	aqC32Bjun2017	0	0	0	0
2018 01 jan-86	91	TAP	2017-10-20	AFS	272AFS26jan2018	0	0	0	0		2017 06 jun-96	92	H2O		AFS	aqC35Bjun2017	0	0	0	0
2018 01 jan-86	91	TAP	2017-10-26	AFS	277AFS26jan2018	0	0	0	0		2017 06 jun-96	92	H2O		AFS	aqC36Bjun2017	0	0	0	0
2018 01 jan-86	91	TAP	2017-11-02	AFS	287AFS26jan2018	0	0	0	0		2017 11 nov-92	92	H2O		AFS	aqC40AFS20oct2017	0	0	0	0
2018 01 jan-86	91	TAP	2017-11-09	AFS	291AFS26jan2018	0	0	0	0		2017 11 nov-92	92	H2O		AFS	aqC42AFS20oct2017	0	0	0	0
2018 06 jun-92	91	tap		AFS	277fAFSjun2018	0	0	0	0		2017 11 nov-92	92	H2O		AFS	aqC50AFS20oct2017	0	0	0	0
2018 06 jun-92	91	tap		AFS	287dAFSjun2018	0	0	0	0		2017 11 nov-92	92	H2O		AFS	aqC43SAT20oct2017	0	0	0	0
2018 06 jun-92	91	tap		AFS	291bAFSjun2018	0	0	0	0		2017 11 nov-92	92	H2O		AFS	aqC51SAT20oct2017	0	0	0	0
2018 09 sep	91	TAP	2018-03-29	AFS	334AFS1sep2018	0	0	0	0		2018 01 jan-86	92	H2O		AFS	H2OAFS26jan2018	0	0	0	0
2018 09 sep	91	TAP	2018-03-29	AFS	334AFS2sep2018	0	0	0	0		2018 01 jan-86	92	H2O		AFS	H2OAFS26jan2018-1	0	0	0	0
2018 09 sep	91	TAP	2018-04-06	AFS	338AFSsep2018	0	0	0	0		2018 01 jan-86	92	H2O		AFS	H2OAFS26jan2018-2	0	0	0	0
2018 09 sep	91	TAP	2018-03-29	AFS	334SAT1sep2018	0	0	0	0		2018 06 jun-92	92	H2O		AFS	H2O2AFSjun2018	0	0	0	0
2018 09 sep	91	TAP	2018-03-29	AFS	334SAT2sep2018	0	0	0	0		2018 06 jun-92	92	H2O		AFS	H2O4AFSjun2018	0	0	0	0
2018 10 oct-96	91	TAP	2018-04-13	AFS	342AFSoct2018	0	0	0	0		2018 06 jun-92	92	H2O		AFS	H2O6AFSjun2018	0	0	0	0
2018 10 oct-96	91	TAP	2018-04-20	AFS	344AFSoct2018	0	0	0	0		2018 09 sep	92	H2O		AFS	H2OAFS1sep2018	0	0	0	0
2018 10 oct-96	91	TAP	2018-06-07	AFS	364AFSoct2018	0	0	0	0		2018 09 sep	92	H2O		AFS	H2OAFS2sep2018	0	0	0	0
2018 10 oct-96	91	TAP	2018-06-07	AFS	364SAToct2018	0	0	0	0		2018 09 sep	92	H2O		AFS	H2OAFSsep2018	0	0	0	0
2018 11 nov	91	tap	2018-06-07	AFS	364AFSanov2018	0	0	0	0		2018 09 sep	92	H2O		AFS	H2OSAT1sep2018	0	0	0	0
2018 11 nov	91	TAP	2018-10-05	AFS	435AFScnov2018	0	0	0	0		2018 09 sep	92	H2O		AFS	H2OSAT2sep2018	0	0	0	0
2018 11 nov	91	TAP	2018-10-11	AFS	439AFS1enov2018	0	0	0	0		2018 10 oct-96	92	H2O		AFS	H2OaAFSoct2018	0	0	0	0
2019 02 feb-96	91	TAP	2019-01-04	AFS	462AFSfeb2019	0	0	0	0		2018 10 oct-96	92	H2O		AFS	H2OcAFSoct2018	0	0	0	0
2019 03mar-96	91	TAP	2018-10-19	AFS	441TAPaAFS	0	0	0	0		2018 10 oct-96	92	H2O		AFS	H2OfAFSoct2018	0	0	0	0
2019 03mar-96	91	TAP	2019-01-04	AFS	462TAPbAFS	0	0	0	0		2018 10 oct-96	92	H2O		AFS	H2OgSAToct2018	0	0	0	0
2019 05 may-96	91	TAP		AFS	477TAP-01-AFS-may2019	0	0	0	0		2018 11 nov	92	H2O		AFS	H2OAFS2enov2018	0	0	0	0
2019 06 jun-96	91	TAP		AFS	441TAP-01AFS-G-jun2019	0	0	0	0		2018 11 nov	92	H2O		AFS	H2OAFSanov2018	0	0	0	0
2019 06 jun-96	91	TAP		AFS	441TAP-02AFS-T-jun2019	0	0	0	0		2018 11 nov	92	H2O		AFS	H2OAFScnov2018	0	0	0	0
2019 06 jun-96	91	TAP		AFS	462TAP-01AFS-G-jun2019	0	0	0	0		2019 02 feb-96	92	H2O		AFS	H2OcAFSfeb2019	0	0	0	0
2019 06 jun-96	91	TAP		AFS	462TAP-02AFS-T-jun2019	0	0	0	0		2019 03mar-96	92	H2O		AFS	H2OaAFS	0	0	0	0
2019 06 jun-96	91	TAP		AFS	477TAP-01AFS-G-jun2019	0	0	0	0		2019 03mar-96	92	H2O		AFS	H2OdAFS	0	0	0	0
2019 06 jun-96	91	TAP		AFS	477TAP-02AFS-G-jun2019	0	0	0	0		2019 05 may-96	92	H2O		AFS	H2O-01-AFS-may2019	0	0	0	0
2019 06 jun-96	91	TAP		AFS	477TAP-03AFS-T-jun2019	0	0	0	0		2019 06 jun-96	92	H2O		AFS	H2O-01AFS-G-jun2019	0	0	0	0
2019 08 aug-96	91	TAP	2019-05-16	AFS	509-TAP-01AFS-Taug2019	0	0	0	0		2019 06 jun-96	92	H2O		AFS	H2O-04AFS-G-jun2019	0	0	0	0
2019 08 aug-96	91	TAP	2019-05-16	AFS	509-TAP-02AFS-Taug2019	0	0	0	0		2019 06 jun-96	92	H2O		AFS	H2O-05AFS-T-jun2019	0	0	0	0
2019 08 aug-96	91	TAP	2019-05-16	AFS	509-TAP-03AFS-Taug2019	0	0	0	0		2019 08 aug-96	92	H20		AFS	H2O-02AFS-Taug2019	0	0	0	0
2019 08 aug-96	91	TAP	2019-06-28	AFS	537-TAP-04AFS-Taug2019	0	0	0	0		2019 08 aug-96	92	H20		AFS	H2O-03AFS-Taug2019	0	0	0	0
											2019 08 aug-96	92	H20		AFS	H2O-04AFS-Taug2019	0	0	0	0
											2019 08 aug-96	92	H20		AFS	H2O-05AFS-Taug2019	0	0	0	0

## Sheet: Table 7 Fish ESVs
Table 7. Fish ESVs detected in NJ coastal samples
REF SEQ #	TAXON ID	SEQUENCE	CATEGORY (1.00=bony; 1.01=cartilaginous)	MATCH SINGLE, MULTIPLE, OR UNKNOWN SPECIES
1	>1.00_Agujon_needlefish_Tylosurus_acus	ACTATGCACAGCCCTAAACTTTGATAGAAACATTACACCCACTATCCGCCAGGGTACTACGAGCTCTAGCTTAAAATCCAAAGGACTTGGCGGTGCTTTAGACCCAC	1	S
2	>1.00_American_anglerfish_Lophius_americanus	ACTATGCCTAGCCCTAAACATTGGCAACACAAAACACCCGTTGCCCGCCAGGGCACTACGAGCATTAGCTTAAAACCCAAAGGACTTGGCGGTGCTTTAGACCCAC	1	S
3	>1.00_American_butterfish_Peprilus_triacanthus	ACTATGCTTAGCCGTAAACATTGATAGAGATTTACACCTTCTATCCGCCTGGGAACTACGAGCATTAGCTTAAAACCCAAAGGACTTGGCGGTACTTTAGATCCCC	1	S
4	>1.00_American_conger_Conger_oceanicus	ACTATGCTTAACTGTAAACAAAGATGATAATACACAAACATCATCCGCCAGGGGATTACGAGCAAAGTTTAAAACCCAAAGGACTTGGCGGTGCCTCAAACCCAC	1	S
5	>1.00_American_eel_Anguilla_rostrata	ACTATGCTCAACCTTAAACAACGATGACAACATACAAATATCATCCGCCAGGGGACTACGAGCGTTAGCTTAAAACCCAAAGGACTTGGCGGTGCCTCAAACCCAC	1	S
6	>1.00_American_gizzard_shad_Dorosoma_cepedianum	ACTATGCCCTGCCGTAAACTTAGATATTTCAATACAACAAATATCCGCCCGGGGACTACGAGCGCCAGCTTAAAACCCAAAGGACTTGGCGGTGCTTCAGACCCCC	1	S
12	>1.00_Atlantic_cod_and_other_gadidae	ACTATGTATGGTCGTTAACATTGATGGTTTTATACCCAAACCATCCGCCTGGGAACTACGAGCAATAGCTTAAAACCCAAAGGACTTGGCGGTGCTTTAGACCCCC	1	S
13	>1.00_Atlantic_croaker	ACTATGCTTAGCCCTAAACATTGACAACAATATACACCTGTTGTCCGCCTGGGAACTACGAGCATCAGCTTAAAACCCAAAGGACTTGGCGGTGCTTTAGACCCAC	1	S
15	>1.00_Atlantic_herring_Clupea_harengus	ACTATGCCCCGCCGTAAACTTAGATATATTAGTACAACAAATATCCGCCCGGGAACTACGAGCGCCAGCTTAAAACCCAAAGGACTTGGCGGTGCTTCAGACCCCC	1	S
17	>1.00_Atlantic_menhaden_Brevoortia_tyrannus_LS17	ACTATGCCCCGCCGTAAACTTAGATATTCCAGTACAATAAATATCCGCCAGGGGACTACGAGCGCCAGCTTAAAACCCAAAGGACTTGGCGGTGCTTCAGACCCCC	1	S
18	>1.00_Atlantic_menhaden_Brevoortia_tyrannus_LS16_or_river_herrings_Clupeidae_sp	ACTATGCCCCGCCGTAAACTTAGATATTCCAGTACAACAAATATCCGCCAGGGGACTACGAGCGCCAGCTTAAAACCCAAAGGACTTGGCGGTGCTTCAGACCCCC	1	M
19	>1.00_Atlantic_moonfish_Selene_setapinnis	ACTATGCTTAGCCTTAAACATTGATCGTTTACCACATCAAACATCCGCCTGGGGATTACGAACACTAGTTTAAAACCCAAAGGACTTGGCGGTGCTTAACATCCAC	1	S
20	>1.00_Atlantic_needlefish_Strongylura_marina	ACTATGCATAGCCCTAAACCTTGATAGAATTTTACACCCCCTATCCGCCAGGATACTACGAGCCCCAGCTTAAAATCCAAAGGACCTGGCGGTGCTTTAGACCCAC	1	S
21	>1.00_Atlantic_salmon_Salmo_salar	ACTATGCCTAGCCGTAAACTTTGATGGAAACATACAACTGACATCCGCCAGGGGACTATAAGCGCCAGCTTAAAACCCAAAGGACTTGGCGGTGCCTCAGACCCAC	1	S
23	>1.00_American_or_northern_sand_lance_Ammodytes_americanus_or_dubius	ACTATGCCTAGCCCTAAACATCGATAGCGCACTACATCTGCTATCCGCCTGGGAACTACGAGCACCAGCTTGAAACCCAAAGGACTTGGCGGTGCTTTAGATCCAC	1	M
25	>1.00_Atlantic_silverside_Menidia_menidia	ACTATGCCTAGCCGTAAACTTTGGTGATAAAACACACATATCACCCGCCCGGGTACTACGAGCATTAGCTTAAAACCCAAAGGACTTGGCGGTGCTTTAGATCCAC	1	S
29	>1.00_Bay_anchovy_Anchoa_mitchilli	ACTATGCCTAGCCGTAAACTTTTATGCTAATGTACAACTAGCATCCGCCAGGGAACTACAAGCACCAGCTTAAAACCCAAAGGACTTGGCGGTGCCTCAGACCCCC	1	S
34	>1.00_Black_drum_or_Spot_Pogonias_cromis_or_Leiostomus_xanthurus	ACTATGCTTAGCCCTAAACATTGACAACAACATACACCTGTTGTCCGCCTGGGAACTACGAGCATCAGCTTGAAACCCAAAGGACTTGGCGGTGCTTTAGATCCAC	1	M
35	>1.00_Black_sea_bass_Centropristis_striata	ACTATGCTCAGCCCTAAACATTGGTAGCGCATCACAGCCGCTACCCGCCTGGGTACTACGAGCACCAGCTTAAAACCCAAAGGACTTGGCGGTGCTTTAGACCCCC	1	S
36	>1.00_Bluefish_Pomatomus_saltatrix	ACTATGCTTAGCCGTAAACATTGATAGAATAGTACATCCCATCTATCCGCCGGGGTACTACGAGCACCAGCTTGAAACCCAAAGGACTTGGCGGTACTTTAGATCCCC	1	S
39	>1.00_Broad_striped_anchovy_Anchoa_hepsetus	ACTATGCCCAGCCGTAAACTTTAATGCTAATGTACAACTAGCATCCGCCAGGGGACTACGAGCACCAGCTTAAAACCCAAAGGACTTGGCGGTGCCTCAGACCCCC	1	S
44	>1.00_Butterfly_mackerel_Gasterochisma_melampus	ACTATGCCTAGCCATAAACATTGATAGAATTTTACACCCTCTATCCGCCTGGGTACTACGAGCATTAGCTTGAAACCCAAAGGACTTGGCGGTACTTTAGATCCCC	1	S
45	>1.00_Capelin_Mallotus_villosus	ACTATGCTTAGCCATAAACTTTGATGTTAATTTACACCTAATATCCGCCAGGGAACTACAAGCGTTAGCTTAAAACCCAAAGGACTTGGCGGTGCCTCACACCCAC	1	S
50	>1.00_Cobia_Rachycentron_canadum	ACTATGCTTAGCCTTAAACATTGATCATTTATTACATAAAACATCCGCCTGGAAATTACGAACGTCAGTTTAAAACCCAAAGGACTTGGCGGTGCTTAACATCCAC	1	S
55	>1.00_Crested_blenny95_Hypleurochilus_germinatus95	ACTATGCTTAGCCTTAAACTTAGATAATACTATTACACCCATTATCCGCCCGGGTACTACGAGCACTAGCTTAAAACCCAAAGGACTTGGCGGTGCTTAATAACCCC	1	U
56	>1.00_Cunner_Tetragolabrus_adspersus	ACTATGCCTAGCCGTAAACATTGATAGTACATTACATTTGCTATCCGCCCGGGTACTACGAGCATAAGCTTAAAACCCAAAGGACTTGGCGGTGCTTTAGATCCAC	1	S
65	>1.00_Feather_blenny_Hypsoblennius_hentz	ACTATGCTTAGCCTTAAACTTAGATAATAGATTACCTAAATTATCCGCCTGGGGACTACGAGCACTAGCTTAAAACCCAAAGGACTTGGCGGTGCTTAATAACCCC	1	S
66	>1.00_Flagfin_mojarra_Eucinostomus_melanopterus	ACTATGCTTAGCCCTAAACACAGATAAAACCTCACTTATTTTTATCCGCCCGGGTACTACGAGCATCAGCTTGAAACCCAAAGGACTTGGCGGTACTTCAGACCCAT	1	S
67	>1.00_Flathead_grey_mullet_Mugil_cephalus	ACTATGCCCAGCCCTAAACTTTGATAATTTATCACACTCATTATCCGCCTGGGAACTACGAGCTTCAGCTTTAAACCCAAAGGACTTGGCGGTGCTTAAGATCCAC	1	S
69	>1.00_Florida_pompano_Trachinotus_carolinus	ACTATGCTTAGCCCTAAACATTGATTATACATTACACCAAACATCCGCCCGGGTATTACGAACATCAGTTTAAAACCCCAAGGACTTGGCGGTGCTTAACATCCAC	1	S
70	>1.00_Fourspine_stickleback_Apelties_quadraacus	ACTATGTCTAGCCCTAAACATTGATAGAGTCTTACAACCACTATCCGCCAGGGGACTACAAGCATCAGCTTGAAACCCAAAGGACTTGGCGGTGCTTTAGATCCAC	1	S
71	>1.00_Fourspot_flounder_Hippoglossina_oblonga	ACTATGCTTAGCCCTAAACATCGATTGTAAAATACACTCAAAATCCGCCCGGGTATTACGAACATTAGTTTAAAACCCAAAGGACTTGGCGGTGCTTAACATCCAC	1	S
76	>1.00_Golden_tilefish_Lopholatilus_chamaeleonticeps	ATTATGCTTAGCCGTAAACATCGACAGCATTTTATACCCGCTGTCCGCCCGGGGACTACGAGCAACAGCTTAAAACCCAAAGGACTTGGCGGTGCTTTAGTCCCAC	1	S
85	>1.00_Grey_triggerfish_Balistes_capriscus	ACTATGCCTAGCCTTAAACATCGATGGCCACTTACTTAAACCATCCGCCAGGGAACTACGAGCATTAGCTTAAAACCCAAAGGACTTGGCGGTGCTTTAGATCCAC	1	S
87	>1.00_Gulf_kingfish_Menticirrhus_littoralis	ACTATGCTTAGTCCTAAACATTGACAACAATACACACCTGTTGTCCGCCTGGGAACTACGAGCACCAGCTTGAAACCCAAAGGACTTGGCGGTGCTTTAGATCCAC	1	S
89	>1.00_Halfbeak_sp98_Hemiramphus_sp98	ACTATGCTCAGCCATAAACCTAGATAAAATTTTACATATATTATCCGCCAGGGTACTACGAGCGCTAGCTTAAAACCCAAAGGACTTGGCGGTGCTTCAAACCCAC	1	U
91	>1.00_Hogchoker_trinectes_maculatus	ACTATGCTTAGCCGTAAACATTGATTATACCAATACACAATAATCCGCCCGGGAATTACGAACAAAAGTTTAAAACCCAAAGGACTTGGCGGTGCTTAACATCCAC	1	S
92	>1.00_Inland_silverside_Menidia_beryllina	ACTATGCCCAGCCCTAAACTTTGATGATAAGACACATATATCATCCGCCCGGGTACTACGAGCATTAGCTTGAAACCCAAAGGACTTGGCGGTGCTTTAGATCCAC	1	S
95	>1.00_Jack_family_caranx_ignobilis99	ACTATGCTTAGCCTTAAACATTGATCGTTTACTACATCAAACATCCGCCCGGGAATTACGAACATTAGTTTAAAACCCAAAGGACTTGGCGGTGCTTAACATCCAC	1	U
98	>1.00_Ladyfish98_Elops_saurus98	ACTATGCTTGGCCGTAAACCTTGATGATAAGGCACAAATATCATCCGCCAGGGGACTACAAGCGTCAGCTTAAAACCCAAAGGACTTGGCGGTGCCCCACACCCAC	1	U
103	>1.00_Lined_seahorse_Hippocampus_erectus	ACTATGCATAGTCTTAAACAAAAGTATTTTAATTACATCATACTCGCCAGGGTACTACGAGCTTTAGCTTAAAACCCAAAGGACTTGGCGGTGCTTTACACCCAC	1	S
107	>1.00_Mahi_mahi_Coryphaena_hippurus	ACTATGCTTAGCCCTAAACATTGACTGTTTATTACATAAACATCCGCCTGGGAACTACGAACATTAGTTTAAAACCCAAAGGACTTGGCGGTGCTTAATATCCAC	1	S
109	>1.00_Mummichog_Fundulus_heteroclitus	ACTATGCACAGCCGTAAACTTTGATAAGAATATACAACATTATCCGCCTGGGTACTACGAGCGTAAGCTTAAAACCCAAAGGACTTGGCGGTGCTTTAGATCCAC	1	S
110	>1.00_Naked_goby_Gobiosoma_bosc	ACTATGCCTAGCCGTAAACATAAACAGCCTGTCACCCCGCTGTTCGCCCGGGTACTACAAGCCCTAGCTTAAAACCCAAAGGACTTGGCGGTGCTTTAGACCCCC	1	S
113	>1.00_Northern_kingfish_Menticirrhus_saxatilis	ACTATGCTTAGTCCTAAACATTGACAACAACACACGCCTGTTGTCCGCCTGGGGACTACGAGCACCAGCTTAAAACCCAAAGGACTTGGCGGTGCTTTAGATCCAC	1	S
114	>1.00_Northern_pipefish96_Syngnathus_fuscus96	ACTATGCATAACCGTAAACACCGATGGCAATTTACTCGCAATCCGCCAGGGAACTACAAGCACTAGCTTGAAACCCAAAGGACTTGGCGGTGCTTTAGACCCAC	1	U
115	>1.00_Northern_pipefish_Syngnathus_fuscus	ACTATGCATAACTGTAAACACAGATAGCAACTTACTCGCAATCCGCCAGGGAACTACAAGCACTGGCTTGAAACCCAAAGGACTTGGCGGTGCTTTAGACCCAC	1	S
116	>1.00_Northern_puffer_Sphoeroides_maculatus	ACTATGCTTAGCCCTAAACAATGATACTTACATACATCCACCATCCGCCCGGGTACTACGAGCATTAGCTTAAAACCCAAAGGACTTGGCGGTGCTTTAAAACCAT	1	S
117	>1.00_Northern_sea_robin_Prionotus_carolinus	ACTATGCTTAGCCCCAAACATTGATAGCACACCACATATGCTATCCGCCCGGGAAGTAAGTGCACGAGCTTGAAACCCAAAGGACTTGGCGGTGCTTTAGATCCCC	1	S
118	>1.00_Northern_sennet_Sphyraena_borealis	ACTATGCTCAGCCCTAAACATTGATTGGACTCTACAACCCCAATCCGCCTGGGAATTACGAACATAAGTTTAAAACCCAAAGGACTTGGCGGTGCTTTATATCCCC	1	S
120	>1.00_Northern_stargazer	ACTATGCCTTGCCCTAAACATAGATGGTAAAATACAACTTCCATCCGCCAGGGAACTACGAGCGTAAGCTTAAAACCCAAAGGACTTGGCGGTGCTTTAGACCCCC	1	S
127	>1.00_Oyster_toadfish_Opsanus_tau	ACTATGTTTAGTCGTAAACTTAGTAGCCGCCAGGATACTACGAGCAACTGCTTAAAAACCAAAGGACCTGGCGGTGCTTTACTCCCC	1	S
130	>1.00_Pacific_sand_lance_Ammodytes_hexapterus	ACTATGCTTAGCCCTAAACATCGATAGCGCAATACACCTGCTATCCGCCTGGGAACTACGAGCATCAGCTTGAAACCCAAAGGACTTGGCGGTGCTTTAGATCCAC	1	S
131	>1.00_Pacific_worm_eel97_Myrophis_wafer97	ACTATGCCTAATTGTAAACAATGACGGGAAAGTACAAAACCCGTCCGCCAGGGGACTACGAGCGCTAGCTTAAAACCCAAAGGACTTGGCGGTGCCTCAAACCCAC	1	U
132	>1.00_Pinfish_Lagodon_rhomoboides	ACTATGCTTAGCCATAAACATTGACAGTATATTACATTTTCTGTCCGCCTGGGAACTACAAGCATTAGCTTAAAACCCAAAGGACTTGGCGGTGCTTTAGACCCAC	1	S
134	>1.00_Pollock_Polachius_virens	ACTATGTATGGTCGTTAACATTGATGGTTTTATACCCAAACCATCCGCCTGGGGACTACGAGCAATAGCTTAAAACCCAAAGGACTTGGCGGTGCTTTAGACCCCC	1	S
138	>1.00_Rainbow_trout_or_Salmon_sp_Oncorhynchus_sp	ACTATGCCTAGCCGTAAACCTTGATAGAAATATACAATTGATATCCGCCAGGGAACTACAAGCGCCAGCTTAAAACCCAAAGGACTTGGCGGTGCCTCAGACCCAC	1	M
139	>1.00_Rainwater_killifish_Lucania_parva	ACTATGCACAGCCGTAAACTTTGATAATAATTTACAATATTATCCGCCCGGGAACTACGAGCGTAAGCTTAAAACCCAAAGGACTTGGCGGTGCTTTAGATCCAC	1	S
147	>1.00_Red_White_or_Spotted_hake_sp_Urophycis_sp	ACTATGTGTGGTCCTCAACATCGATAATTATTGTACTTAAATTATCCGCCCGGGAACTACGAGCATTAGCTTAAAACCCAAAGGACTTGGCGGTGCTTTAGACCCCC	1	M
150	>1.00_Rough_silverside_Membras_martinica	ACTATGCCCAGCCCTAAACTTTGATAATAACCTACACCTATTATCCGCCCGGGTATTACGAGCACCAGCTTAAAACCCAAAGGACTTGGCGGTGCTTTAGATCCAC	1	S
151	>1.00_Scup_Stenotomus_chrysops	ACTATGCTTAGCCATAAACATTGACAGTCTACTACATTTTCTGTCCGCCCGGGAACTACGAGCATTAGCTTAAAACCCAAAGGACTTGGCGGTGCTTTAGACCCAC	1	S
152	>1.00_Seaboard_goby_Gobiosoma_ginsburgi	ACTATGCCTAGCCGTAAACATAAGCAGCCTATCACTCCGCTGTTCGCCAGGGGACTACAAGCCCCAGCTTAAAACCCAAAGGACTTGGCGGTGCTTTAGACCCCC	1	S
153	>1.00_Sea_lamprey_Petromyzon_marinus	GCTATGCCTGCCATAAATAAACAACCGTCGCCAGGGCACTACGAACAATCGTTTAAAACCCAAAGAACTTGACGGCACCCTAAACCCAC	1	S
154	>1.00_Sheepshead_minnow_Cyprindon_variegatus	ACTATGCACAGCCCTAAACTTCGATAATATCTTACAACTATTATCCGCCCGGGAACTACGAGCATTAGCTTAAAACCCAAAGGACTTGGCGGTGCTTTAGATCCCT	1	S
157	>1.00_Silver_perch_Bardiella_chrysoura	ACTATGCTTAGCCCTAAACATTGACAACAAGATACAACTGTTGTCCGCCTGGACACTACGAGCACCAGCTTGAAAGCCAAAGGACTTGGCGGTGCCTTAGACCCAC	1	S
158	>1.00_Skilletfish_Gobiesox_strumosus	ACTATGCTCAGCCGTAAACAACGATAGCCCCTGCACTTGCTACCCGCCCGGGAACTACGAGCCCCAGCTTGAAACCCAAAGGACTTGGCGGTGCTTAAGATCCAC	1	S
160	>1.00_Smallmouth_flounder_Etropus_microstomus	ACTATGCTTAGCCCTAAACATAGAATAAACTTTACTTAATATACTCCGCCCGGGTATTACGAGCATCAGCTTAAAACCCAAAGGACTTGGCGGTGCTTTACATCCAC	1	S
161	>1.00_Southern_kingfish_Menticirrhus_americanus	ACTATGCTTAGTCGTAAACATTGACAACAACACACACCTGTTGTCCGCCTGGGAACTACGAGCGCCAGCTTAAAACCCAAAGGACTTGGCGGTGCTTTAGATCCAC	1	S
164	>1.00_Spotfin_killifish_Fundulus_luciae	ACTATGCACAGCCATAAACTTTGATAAAAATATACAATATTATCCGCCCGGGTACTACGAGCATGAGCTTAAAACCCAAAGGACTTGGCGGTGCTTTAGATCCAC	1	S
165	>1.00_Spotfin_mojarra_Eucinostomus_argentatus	ACTATGCTTAGCCCTAAATATAGATAAAGCCTCACCTTTGACTTTATCCGCCAGGGTACTACGAGCGCTAGCTTAAAACCCAAAGGACTTGGCGGTGCTTCAAACCCAA	1	S
171	>1.00_Striped_bass_Morone_saxatilis	ACTATGCTTAGCCTTAAACATAGACAGTTGTTTACCCCCACTGTCCGCCCGGGCACTACGAGCATTAGCTTGAAACCCAAAGGACTTGGCGGTGCTTTAGACCCAC	1	S
172	>1.00_Striped_blenny_Chasmodes_bosquianus	ACTATGCTTAGCCTTAAACTTAGTTAGTATATTACATACACACCCGCCTGGGAACTACGAGCATTAGCTTAAAACCCAAAGGACTTGGCGGTGCTTAACACCCCC	1	S
173	>1.00_Striped_burrfish_Chilomycterus_schoepfi	ACTATGCCTAGCCCTAAACATTGACAGTAAATTCACCAACTGTTCGCCCGGGAACTACGAGCACCAGCTTAAAACCCAAAGGACTTGGCGGTGCTTTAGACCCAC	1	S
174	>1.00_Striped_cusk_eel_Ophidon_marginatum	ACTATGCTAAGCCTTAAACATAGACATACTCTGTCCGCCAGGGTATTACGAGCATCAGCTTAAAACCCAAAGGACTTGGCGGTACTTTACACCCAC	1	S
175	>1.00_Striped_killifish_Fundulus_majalis	ACTATGCACAGCCGTAAACTTTGATATGATATTACAACATTATCCGCCTGGGGACTACGAGCGTAAGCTTAAAACCCAAAGGACTTGGCGGTGCTTTAGATCCAT	1	S
176	>1.00_Striped_sea_robin_Prionotus_evolans	ACTATGCTTAGCCCTAAACATTGGCAGCACACCACATATGCTGCCCGCCTGGGAAGTAAGAGCACCAGCTTGAAACCCAAAGGACTTGGCGGTGCTTTAGATCCCC	1	S
179	>1.00_Summer_flounder_Paralichthys_dentatus	ACTATGCTTAGCCCTAAACATCGATTGTATAATACACTCAATATCCGCCCGGGGATTACAAACGTTAGTTTAAAACCCAAAGGACTTGGCGGTGCTTAACATCCAC	1	S
180	>1.00_Swordfish_Xiphias_gladius	ACTATGCTTAGCCCTAAACATCGATTATTAATTACACCCAATATCCGCCCGGGAATTACGAGCATCAGTTTAAAACCCAAAGGACTTGGCGGTGCTTAACATCCAC	1	S
181	>1.00_Tautog_Tautoga_onitis	ACTATGCCTAGCCGTAAACATCGATAGTGCATTACGTTAACTATCCGCCCGGGTACTACGAGCATGAGCTTAAAACCCAAAGGACTTGGCGGTGCTTTAGATCCAC	1	S
182	>1.00_Thread_herring_Opisthonema_oglinum	ACTATGCCCTGCCGTAAACTTAGATATTTCAATACAATAAATATCCGCCCGGGGACTACGAGCGCCAGCTTAAAACCCAAAGGACTTGGCGGTGCTTCAGACCCCC	1	S
183	>1.00_Three-spined_stickleback_Gasterosteus_aculeatus	ACTATGCCTAGCCCTAAACATTGATAGAATTTTACAACCACTATCCGCCCGGGGACTACAAGCATCAGCTTGAAACCCAAAGGACTTGGCGGTGCTTTAGATCCAC	1	S
184	>1.00_Tidewater_mojarra_Eucinstomus_harengulus	ACTATGCTTAGCCCTAAATACAGATAAAATTACACTTTACTTTATCCGCCCGGGTACTACGAGCATTAGCTTGAAACCCAAAGGACTTGGCGGTGCTTTAGACCCAT	1	S
186	>1.00_Tomcod_Microgadus_tomcod	ACTATGTATGGTTGTTAACATCGATGGTTTTATACCCAAACCATCCGCCTGGGGACTACGAGCAATAGCTTAAAACCCAAAGGACTTGGCGGTGCTTTAGACCCCC	1	S
187	>1.00_Tuna_sp_Thunnus_sp	ACTATGCCTAGCCGTAAACATTGATAGAATTTTACACCCTCTATCCGCCTGGGTACTACGAGCATTAGCTTGAAACCCAAAGGACTTGGCGGTACTTTAGATCCCC	1	M
192	>1.00_Unknown_fish_Stiphodon_alcedo93	ACTATGCCTAGCCATAAACACAGGTGAATACATCACACCTATCACTTGCCCGGAAACTACGAGCCCCAGCTTAAAACCCAAAGGACTTGGCGGTGCTTTAGACCCAC	1	U
196	>1.00_Weakfish_Cynoscion_regalis	ACTATGCTTAGCCTTAAACATTGACAACAACATACACCTGTTGTCCGCCTGGGTACTACGAGCATTAGCTTAAAACCCAAAGGACTTGGCGGTGCTTTAGACCCAC	1	S
200	>1.00_White_mullet_Mugil_curema	ACTATGCTCAGCCCTAAACTTTGATAGTTTTACCACACCCACTATCCGCCCGGGTACTACGAGCTTTAGCTTAAAACCCAAAGGACTTGGCGGTGCTTAAGATCCGT	1	S
203	>1.00_Windowpane_flounder_Scophthalmos_aquosus	ACTATGCTTAGCCCTAAACATCGATTTAATACCCCATTAAATCCGCCTGGGGACTACGAACGTATGTTTAAAACCCCAAGGACTTGGCGGTGCTTTATATCCAC	1	S
204	>1.00_Winter_or_Yellowtail_flounder_Pseudopleuronectes_americanus_or_Pleuronectes_ferrugineus	ACTATGCTTAGCCCTAAACATCGATTGCACCATACACTCCATATCCGCCCGGGAATTATGAACGTCAGTTTAAAACCCAAAGGACTTGGCGGTGCTTAACATCCAC	1	M
212	>1.01_Atlantic_sharpnose_shark_Rhizoprionodon_terraenovae	ACTATGCCCAACCATAAACTTAGACAACACTCCACTATATTGTTCGCCAGAATACTACAAGCGCTAGCTTAAAACCCAAAGGACTTGGCGGTATCCCACACCCAC	1.01	S
216	>1.01_Bluntnose_stingray_Dasyatis_say	ACTATGCTTAACCATAAACATTGTTATAAATAAACCTACCTTAACATACCGCCTGAATACTACAAGCGCTAGCTTAAAATCCAAAGGACTTGGCGGTGCTCCATACCCAC	1.01	S
217	>1.01_Brazilian_cownose_ray_Rhinoptera_brasiliensis	ACTATGCTCAACCATAAACATTGTTACTAATAATTTACCTTAATACCCGCCCGAGTACTACAAGCGCTAGCTTAAAACCCAAAGGACTTGGCGGTGCTCCAAATCCAC	1.01	S
218	>1.01_Bullnose_ray_Myliobatis_freminvillii	ACTATGCTTAACTATAAACATTGTTATTAATGAACTTACCTTAATATCCGCCCGAGTACTACAAGCGCTAGCTTAAAACCCAAAGGACTTGGCGGTGCTCCAAATCCCC	1.01	S
220	>1.01_Clearnose_skate_Raja_eglanteria	ACTATGCCTAACCATAAATAGACCCTACCACTACTTACCTTGTCTAAGTCCGCCCGAGTACTACAAGCGCTAGCTTAAAACCCAAAGGACTTGGCGGTGCCCCAGACCCCC	1.01	S
221	>1.01_Cownose_ray_Rhinoptera_bonasus	ACTATGCTCAACCATAAACATCGTTACTAATGATTTACCTTAATACCCGCCCGAGTACTACAAGCGCTAGCTTAAAACCCAAAGGACTTGGCGGTGCTCCAAACCCAC	1.01	S
223	>1.01_Roughtail_stingray_Dasyatis_centroura	ACTATGCTTAACCGTAAACATTGTTACAAGCATATTTACCTTAATACACCGCCTGAACACTACAAGCGCTAGCTTAAAATCCAAAGGACTTGGCGGTGCTCCAAACCCAC	1.01	S
224	>1.01_Sandbar_shark_Carcharhinus_plumbeus	ACTATGCTCAACCACAAACTTAAACAACATCCTACTATATTGTTCGCCAGAGTACTACAAGCGCTAGCTTAAAACCCAAAGGACTTGGCGGTATCCCATACCCAC	1.01	S
226	>1.01_Smooth_dogfish_Mustelus_canis	ACTATGTCCAACCACAAACTTAGACAATAAATCACTATATTGTTCGCCCGAGTACTACAAGCGCTAGCTTAAAACCCAAAGGACTTGGCGGTATCCCATACCCAC	1.01	S
228	>1.01_Spiny_butterfly_ray_Gynmura_altavela	ACTATGCTTAACTATAAACATTGCTATTAATAAATATACCTTAATATCCGCCTGAGTACTACAAGCGCTAGCTTAAAACCCAAAGGACTTGGCGGTGCTCCACACCCAC	1.01	S
229	>1.01_Spiny_dogfish_Squaalus_acanthias	ACTATGCCCAACCACAAACTTAGACAATAACCTACTACATTGTCCGCCAGAGTACTACAAGCGCTAGCTTAAAACCCAAAGGACTTGGCGGTGCTTCAGACCCCC	1.01	S
231	>1.01_Unknown_ray94c	ACTATGCTTAACCATAAACATCGTTATAAACAAACCTACCTTAATACACCGCCTGAATACTACAAGCGCTAGCTTACAATCCAAAGGACTTGGCGGTGCTCCAAACCCAC	1.01	U
232	>1.01_Unknown_ray_sp95	ACTATGCTTAACCGTAAACATTGTTACAAATAAATTTACCTTAACACACCGCCTGAATACTACAAGCGCTAGCTTACAATCCAAAGGACTTGGCGGTGCTCCAAACCCAC	1.01	U
233	>1.01_Unknown_shark_sp_shark96B	ACTATGCCCAACCATAAACTTAGACAACACTCCACTATATTGTTCGCCAGAATACTACAAGCGCTAGCTTAAAACCCAAAGGACTTGACGGTATCCCACACCCAC	1.01	U
235	>1.01_Winter_skate_or_Little_skate_Leucoraja_ocellata_or_erinacea	ACTATGCTTAACCATAAATAGACCTTTACCACTACTTACTTTGTTTAAGTCCGCCTGAGTACTACAAGCGCTAGCTTAAAACCCAAAGGACTTGGCGGTGCCCCAGACCCCC	1.01	M

## Sheet: Table 8 Fish detections
Table 8. Fish eDNA detections																OCEAN AF/AR
	IDs based on new sequences highlighted in blue														MiSeq run	2017 06 jun-96	2017 06 jun-96	2017 06 jun-96	2017 06 jun-96	2017 06 jun-96	2017 11 nov-92	2017 11 nov-92	2017 11 nov-92	2017 11 nov-92	2017 11 nov-92	2017 11 nov-92	2017 11 nov-92	2017 11 nov-92	2017 11 nov-92	2018 01 jan-86	2018 01 jan-86	2018 01 jan-86	2018 01 jan-86	2018 01 jan-86	2018 01 jan-86	2018 01 jan-86	2018 01 jan-86	2018 06 jun-92	2018 06 jun-92	2018 06 jun-92	2018 06 jun-92	2018 09 sep	2018 09 sep	2018 09 sep	2018 09 sep	2018 09 sep	2018 09 sep	2018 09 sep	2018 09 sep
															Site number	1	1	1	1	1	1	1	1	1	1	1	1	1	1	1	1	1	1	1	1	1	1	1	1	1	1	1	1	1	1	1	1	1	1
	PRIMER PAIR						AF/AR		AFS/AR		AF/AR		AFS/AR		Site name	BLO	BLO	BLO	BLO	BLO	BLO	BLO	BLO	BLO	BLO	BLO	BLO	BLO	BLO	BLO	BLO	BLO	BLO	BLO	BLO	BLO	BLO	BLO	BLO	BLO	BLO	BLO	BLO	BLO	BLO	BLO	BLO	BLO	BLO
	BONY FISH ESVs						66		61		63		49		Collection date	2017-04-02	2017-04-16	2017-04-23	2017-05-14	2017-05-29	2017-06-11	2017-07-03	2017-07-09	2017-07-23	2017-08-06	2017-08-27	2017-09-04	2017-09-10	2017-09-17	2017-10-01	2017-10-14	2017-10-22	2017-10-29	2017-11-05	2017-11-19	2017-12-03	2017-12-23	2018-02-25	2018-03-03	2018-03-18	2018-03-25	2018-04-01	2018-04-08	2018-04-22	2018-04-29	2018-05-13	2018-05-20	2018-05-27	2018-06-03
	CARTILAGINOUS FISH ESVs						7		15		3		5		Primer name	AFAR	AFAR	AFAR	AFAR	AFAR	AFAR	AFAR	AFAR	AFAR	AFAR	AFAR	AFAR	AFAR	AFAR	AFAR	AFAR	AFAR	AFAR	AFAR	AFAR	AFAR	AFAR	AFAR	AFAR	AFAR	AFAR	AFAR	AFAR	AFAR	AFAR	AFAR	AFAR	AFAR	AFAR
REF SEQ #	TAXON NAME	SEQUENCE	CATEGORY (1.00=bony; 1.01=cartilaginous)	MATCH SINGLE, MULTIPLE, OR UNKNOWN SPECIES	TOTAL READS	TOTAL DETECTIONS	OCEAN AF/AR READS	OCEAN AF/AR DETECTIONS	OCEAN AFS/AR READS	OCEAN AFS/AR DETECTIONS	BAY AF/AR READS	BAY AF/AR DETECTIONS	BAY AFS/AR READS	BAY AFS/AR DETECTIONS	library	aq195Ajun2017	aq202Ajun2017	aq207Ajun2017	aq218Ajun2017	aq226Ajun2017	aq233AFAR20oct2017	aq239AFAR20oct2017	aq243AFAR20oct2017	aq247AFAR20oct2017	aq253AFAR20oct2017	aq255AFAR20oct2017	aq257AFAR20oct2017	aq259AFAR20oct2017	aq261AFAR20oct2017	265AFAR26jan2018	269AFAR26jan2018	274AFAR26jan2018	278AFAR26jan2018	288AFAR26jan2018	293AFAR26jan2018	297AFAR26jan2018	301AFAR26jan2018	311AFARjun2018	314AFARjun2018	327AFARjun2018	331AFARjun2018	335AFARsep2018	339AFARsep2018	345AFARsep2018	348AFARsep2018	352AFARsep2018	355AFARsep2018	358AFARsep2018	361AFARsep2018
25	>1.00_Atlantic_silverside_Menidia_menidia	ACTATGCCTAGCCGTAAACTTTGGTGATAAAACACACATATCACCCGCCCGGGTACTACGAGCATTAGCTTAAAACCCAAAGGACTTGGCGGTGCTTTAGATCCAC	1	S	2231803	120	33927	18	27965	12	1219752	48	950159	42		0	0	0	0	1193	0	0	1198	0	0	0	0	0	0	0	845	0	0	2465	1876	0	0	0	0	0	0	0	0	0	0	0	0	2273	0
175	>1.00_Striped_killifish_Fundulus_majalis	ACTATGCACAGCCGTAAACTTTGATATGATATTACAACATTATCCGCCTGGGGACTACGAGCGTAAGCTTAAAACCCAAAGGACTTGGCGGTGCTTTAGATCCAT	1	S	1993554	95	1391	2	0	0	1382015	48	610148	45		0	0	0	0	678	0	0	0	0	0	0	0	0	0	0	0	0	0	0	0	0	0	0	0	0	0	0	0	0	0	0	0	0	0
109	>1.00_Mummichog_Fundulus_heteroclitus	ACTATGCACAGCCGTAAACTTTGATAAGAATATACAACATTATCCGCCTGGGTACTACGAGCGTAAGCTTAAAACCCAAAGGACTTGGCGGTGCTTTAGATCCAC	1	S	1963998	108	3060	4	987	1	1164656	55	795295	48		0	0	0	0	0	0	0	0	0	0	0	0	0	0	0	0	0	0	0	0	0	0	0	0	0	0	0	0	0	0	0	0	0	0
23	>1.00_American_or_northern_sand_lance_Ammodytes_americanus_or_dubius	ACTATGCCTAGCCCTAAACATCGATAGCGCACTACATCTGCTATCCGCCTGGGAACTACGAGCACCAGCTTGAAACCCAAAGGACTTGGCGGTGCTTTAGATCCAC	1	M	958067	62	653652	28	295694	27	5206	4	3515	3		0	0	0	0	0	1218	2995	6625	877	130	0	0	0	0	0	0	0	1466	0	1620	761	3966	0	7091	0	2790	0	1221	0	0	0	0	2089	0
17	>1.00_Atlantic_menhaden_Brevoortia_tyrannus_LS17	ACTATGCCCCGCCGTAAACTTAGATATTCCAGTACAATAAATATCCGCCAGGGGACTACGAGCGCCAGCTTAAAACCCAAAGGACTTGGCGGTGCTTCAGACCCCC	1	S	692616	134	375552	49	163746	36	86632	27	66686	22		3922	4486	0	2417	0	6957	1098	2638	513	179	1113	4619	0	1653	673	1753	1309	20004	13747	19197	41971	12846	15796	12527	0	982	203	5140	6510	544	1395	11629	5685	989
29	>1.00_Bay_anchovy_Anchoa_mitchilli	ACTATGCCTAGCCGTAAACTTTTATGCTAATGTACAACTAGCATCCGCCAGGGAACTACAAGCACCAGCTTAAAACCCAAAGGACTTGGCGGTGCCTCAGACCCCC	1	S	647970	63	435916	27	206079	24	3737	7	2238	5		0	0	0	0	0	901	928	0	0	1722	0	732	630	1087	100877	12896	4003	7687	5911	4309	0	0	0	0	0	0	0	0	0	0	0	0	146552	1202
18	>1.00_Atlantic_menhaden_Brevoortia_tyrannus_LS16_or_river_herrings_Clupeidae_sp	ACTATGCCCCGCCGTAAACTTAGATATTCCAGTACAACAAATATCCGCCAGGGGACTACGAGCGCCAGCTTAAAACCCAAAGGACTTGGCGGTGCTTCAGACCCCC	1	M	551802	121	282489	41	121985	33	83245	30	64083	17		0	0	574	3851	782	3536	2006	3014	628	0	0	6258	0	1709	812	2674	5228	29696	14974	14269	33701	16223	11242	8830	0	3269	0	4396	5715	707	2882	3488	3038	0
36	>1.00_Bluefish_Pomatomus_saltatrix	ACTATGCTTAGCCGTAAACATTGATAGAATAGTACATCCCATCTATCCGCCGGGGTACTACGAGCACCAGCTTGAAACCCAAAGGACTTGGCGGTACTTTAGATCCCC	1	S	261965	78	136165	30	110180	24	9527	11	6093	13		0	219	356	5909	216	1734	0	0	4597	2074	2108	4041	2904	5575	6411	6733	30032	8614	4682	631	0	0	0	0	0	0	0	0	0	0	0	1503	0	591
157	>1.00_Silver_perch_Bardiella_chrysoura	ACTATGCTTAGCCCTAAACATTGACAACAAGATACAACTGTTGTCCGCCTGGACACTACGAGCACCAGCTTGAAAGCCAAAGGACTTGGCGGTGCCTTAGACCCAC	1	S	242470	62	8525	13	15909	15	130339	17	87697	17		0	0	0	0	0	2727	0	261	472	420	0	56	0	0	0	712	187	1629	0	40	0	0	0	0	0	0	0	0	0	0	0	0	0	0
115	>1.00_Northern_pipefish_Syngnathus_fuscus	ACTATGCATAACTGTAAACACAGATAGCAACTTACTCGCAATCCGCCAGGGAACTACAAGCACTGGCTTGAAACCCAAAGGACTTGGCGGTGCTTTAGACCCAC	1	S	189591	71	9089	12	6497	7	94066	26	79939	26		0	0	0	0	0	292	0	267	0	239	340	591	0	0	0	150	0	0	0	1098	0	0	0	0	0	0	0	0	0	0	0	0	0	0
154	>1.00_Sheepshead_minnow_Cyprindon_variegatus	ACTATGCACAGCCCTAAACTTCGATAATATCTTACAACTATTATCCGCCCGGGAACTACGAGCATTAGCTTAAAACCCAAAGGACTTGGCGGTGCTTTAGATCCCT	1	S	183276	57	5012	2	0	0	111047	30	67217	25		0	0	0	0	0	0	0	0	0	0	0	0	0	0	0	400	0	0	0	0	0	0	0	0	0	0	0	0	0	0	0	0	0	0
69	>1.00_Florida_pompano_Trachinotus_carolinus	ACTATGCTTAGCCCTAAACATTGATTATACATTACACCAAACATCCGCCCGGGTATTACGAACATCAGTTTAAAACCCCAAGGACTTGGCGGTGCTTAACATCCAC	1	S	176458	28	73561	13	102669	14	228	1	0	0		0	0	0	0	0	0	0	0	0	461	3048	1815	7536	2695	0	342	0	0	0	0	0	0	0	0	0	0	0	0	0	0	0	0	0	0
181	>1.00_Tautog_Tautoga_onitis	ACTATGCCTAGCCGTAAACATCGATAGTGCATTACGTTAACTATCCGCCCGGGTACTACGAGCATGAGCTTAAAACCCAAAGGACTTGGCGGTGCTTTAGATCCAC	1	S	138462	47	102862	23	31207	17	3785	5	608	2		0	0	0	203	675	0	0	2348	0	868	0	0	0	0	2362	5609	0	0	24416	0	637	0	5303	21783	0	7470	0	0	0	0	3125	0	0	6203
110	>1.00_Naked_goby_Gobiosoma_bosc	ACTATGCCTAGCCGTAAACATAAACAGCCTGTCACCCCGCTGTTCGCCCGGGTACTACAAGCCCTAGCTTAAAACCCAAAGGACTTGGCGGTGCTTTAGACCCCC	1	S	138237	43	0	0	0	0	83508	21	54729	22		0	0	0	0	0	0	0	0	0	0	0	0	0	0	0	0	0	0	0	0	0	0	0	0	0	0	0	0	0	0	0	0	0	0
200	>1.00_White_mullet_Mugil_curema	ACTATGCTCAGCCCTAAACTTTGATAGTTTTACCACACCCACTATCCGCCCGGGTACTACGAGCTTTAGCTTAAAACCCAAAGGACTTGGCGGTGCTTAAGATCCGT	1	S	128879	50	13772	12	8283	8	62120	16	44704	14		0	0	0	0	0	0	0	1528	0	0	0	0	395	677	129	257	4155	48	0	0	0	0	0	0	0	0	0	0	0	0	0	0	0	0
87	>1.00_Gulf_kingfish_Menticirrhus_littoralis	ACTATGCTTAGTCCTAAACATTGACAACAATACACACCTGTTGTCCGCCTGGGAACTACGAGCACCAGCTTGAAACCCAAAGGACTTGGCGGTGCTTTAGATCCAC	1	S	123965	34	69129	17	54836	17	0	0	0	0		0	0	0	0	0	0	0	0	979	125	1612	2194	2956	3590	0	1199	2499	1687	617	0	0	0	0	0	0	0	0	0	0	0	0	0	0	0
70	>1.00_Fourspine_stickleback_Apelties_quadraacus	ACTATGTCTAGCCCTAAACATTGATAGAGTCTTACAACCACTATCCGCCAGGGGACTACAAGCATCAGCTTGAAACCCAAAGGACTTGGCGGTGCTTTAGATCCAC	1	S	111139	90	13731	11	3306	8	56670	42	37432	29		928	0	0	0	7342	0	0	0	0	0	0	0	0	0	0	290	0	0	0	0	0	0	0	0	0	0	0	542	565	0	0	0	0	88
171	>1.00_Striped_bass_Morone_saxatilis	ACTATGCTTAGCCTTAAACATAGACAGTTGTTTACCCCCACTGTCCGCCCGGGCACTACGAGCATTAGCTTGAAACCCAAAGGACTTGGCGGTGCTTTAGACCCAC	1	S	80733	80	43006	28	15742	20	14887	19	7098	13		0	0	652	0	558	399	0	0	0	0	0	1289	25	313	252	504	0	636	2836	1823	0	16229	0	155	0	1095	2135	0	2855	51	1355	493	808	0
179	>1.00_Summer_flounder_Paralichthys_dentatus	ACTATGCTTAGCCCTAAACATCGATTGTATAATACACTCAATATCCGCCCGGGGATTACAAACGTTAGTTTAAAACCCAAAGGACTTGGCGGTGCTTAACATCCAC	1	S	62711	77	16376	17	9597	22	15498	18	21240	20		0	0	0	0	0	0	353	0	0	0	290	0	0	0	0	669	0	1607	1503	2061	0	0	520	0	0	1368	0	0	0	14	0	304	0	0
204	>1.00_Winter_or_Yellowtail_flounder_Pseudopleuronectes_americanus_or_Pleuronectes_ferrugineus	ACTATGCTTAGCCCTAAACATCGATTGCACCATACACTCCATATCCGCCCGGGAATTATGAACGTCAGTTTAAAACCCAAAGGACTTGGCGGTGCTTAACATCCAC	1	M	60419	41	22587	10	2006	4	12783	13	23043	14		0	0	0	0	0	0	0	0	0	0	0	0	0	0	0	0	0	0	0	0	0	793	1680	11801	1199	1164	0	496	0	0	0	0	0	0
113	>1.00_Northern_kingfish_Menticirrhus_saxatilis	ACTATGCTTAGTCCTAAACATTGACAACAACACACGCCTGTTGTCCGCCTGGGGACTACGAGCACCAGCTTAAAACCCAAAGGACTTGGCGGTGCTTTAGATCCAC	1	S	51764	43	21591	14	21267	16	4311	6	4595	7		0	0	0	0	2612	3367	0	0	0	0	0	1044	152	0	448	203	206	1066	0	0	0	0	0	0	0	0	0	0	0	0	0	0	0	0
150	>1.00_Rough_silverside_Membras_martinica	ACTATGCCCAGCCCTAAACTTTGATAATAACCTACACCTATTATCCGCCCGGGTATTACGAGCACCAGCTTAAAACCCAAAGGACTTGGCGGTGCTTTAGATCCAC	1	S	51036	22	20866	12	30170	10	0	0	0	0		0	0	0	0	0	0	0	0	0	0	3555	0	275	417	1759	0	51	0	1030	0	0	0	0	0	0	0	0	0	0	0	0	0	253	0
34	>1.00_Black_drum_or_Spot_Pogonias_cromis_or_Leiostomus_xanthurus	ACTATGCTTAGCCCTAAACATTGACAACAACATACACCTGTTGTCCGCCTGGGAACTACGAGCATCAGCTTGAAACCCAAAGGACTTGGCGGTGCTTTAGATCCAC	1	M	42333	43	5402	7	2233	6	21493	14	13205	16		0	0	0	0	0	0	0	0	0	0	0	0	0	0	1084	355	472	0	0	0	0	671	0	0	0	0	0	0	0	0	0	615	1616	0
139	>1.00_Rainwater_killifish_Lucania_parva	ACTATGCACAGCCGTAAACTTTGATAATAATTTACAATATTATCCGCCCGGGAACTACGAGCGTAAGCTTAAAACCCAAAGGACTTGGCGGTGCTTTAGATCCAC	1	S	39318	45	0	0	60	1	25617	26	13641	18		0	0	0	0	0	0	0	0	0	0	0	0	0	0	0	0	0	0	0	0	0	0	0	0	0	0	0	0	0	0	0	0	0	0
164	>1.00_Spotfin_killifish_Fundulus_luciae	ACTATGCACAGCCATAAACTTTGATAAAAATATACAATATTATCCGCCCGGGTACTACGAGCATGAGCTTAAAACCCAAAGGACTTGGCGGTGCTTTAGATCCAC	1	S	37709	37	0	0	0	0	20198	19	17511	18		0	0	0	0	0	0	0	0	0	0	0	0	0	0	0	0	0	0	0	0	0	0	0	0	0	0	0	0	0	0	0	0	0	0
92	>1.00_Inland_silverside_Menidia_beryllina	ACTATGCCCAGCCCTAAACTTTGATGATAAGACACATATATCATCCGCCCGGGTACTACGAGCATTAGCTTGAAACCCAAAGGACTTGGCGGTGCTTTAGATCCAC	1	S	36901	38	0	0	72	1	18755	18	18074	19		0	0	0	0	0	0	0	0	0	0	0	0	0	0	0	0	0	0	0	0	0	0	0	0	0	0	0	0	0	0	0	0	0	0
35	>1.00_Black_sea_bass_Centropristis_striata	ACTATGCTCAGCCCTAAACATTGGTAGCGCATCACAGCCGCTACCCGCCTGGGTACTACGAGCACCAGCTTAAAACCCAAAGGACTTGGCGGTGCTTTAGACCCCC	1	S	36900	27	1734	8	1498	4	20909	7	12759	8		0	0	0	48	0	0	0	361	0	0	0	0	0	0	152	232	0	0	0	0	0	0	0	0	0	0	0	0	0	0	0	0	0	0
39	>1.00_Broad_striped_anchovy_Anchoa_hepsetus	ACTATGCCCAGCCGTAAACTTTAATGCTAATGTACAACTAGCATCCGCCAGGGGACTACGAGCACCAGCTTAAAACCCAAAGGACTTGGCGGTGCCTCAGACCCCC	1	S	32498	35	24735	18	5800	9	712	4	1251	4		0	0	0	0	0	0	0	0	423	612	184	531	978	785	346	92	0	0	0	0	0	0	0	0	0	0	0	0	0	0	0	0	0	0
203	>1.00_Windowpane_flounder_Scophthalmos_aquosus	ACTATGCTTAGCCCTAAACATCGATTTAATACCCCATTAAATCCGCCTGGGGACTACGAACGTATGTTTAAAACCCCAAGGACTTGGCGGTGCTTTATATCCAC	1	S	28765	37	20361	17	7232	18	634	1	538	1		0	0	0	0	0	0	1139	0	0	0	0	90	0	0	345	124	24	652	0	1380	690	3047	0	834	0	183	713	0	3572	34	0	0	0	0
187	>1.00_Tuna_sp_Thunnus_sp	ACTATGCCTAGCCGTAAACATTGATAGAATTTTACACCCTCTATCCGCCTGGGTACTACGAGCATTAGCTTGAAACCCAAAGGACTTGGCGGTACTTTAGATCCCC	1	M	27758	8	15136	2	4155	3	2040	1	6427	2		0	0	0	0	0	0	0	0	0	0	0	0	0	0	0	802	0	0	14334	0	0	0	0	0	0	0	0	0	0	0	0	0	0	0
5	>1.00_American_eel_Anguilla_rostrata	ACTATGCTCAACCTTAAACAACGATGACAACATACAAATATCATCCGCCAGGGGACTACGAGCGTTAGCTTAAAACCCAAAGGACTTGGCGGTGCCTCAAACCCAC	1	S	24067	42	377	1	1980	3	15020	20	6690	18		0	0	0	0	0	0	0	0	0	0	0	0	0	0	0	377	0	0	0	0	0	0	0	0	0	0	0	0	0	0	0	0	0	0
158	>1.00_Skilletfish_Gobiesox_strumosus	ACTATGCTCAGCCGTAAACAACGATAGCCCCTGCACTTGCTACCCGCCCGGGAACTACGAGCCCCAGCTTGAAACCCAAAGGACTTGGCGGTGCTTAAGATCCAC	1	S	18723	16	9483	5	2162	2	3073	2	4005	7		0	0	0	0	0	0	0	0	0	0	0	0	0	0	0	0	0	0	0	0	0	0	0	0	0	0	0	0	0	0	0	0	0	0
152	>1.00_Seaboard_goby_Gobiosoma_ginsburgi	ACTATGCCTAGCCGTAAACATAAGCAGCCTATCACTCCGCTGTTCGCCAGGGGACTACAAGCCCCAGCTTAAAACCCAAAGGACTTGGCGGTGCTTTAGACCCCC	1	S	16127	17	5930	4	2838	4	4598	5	2761	4		0	0	0	0	0	0	0	0	0	0	0	0	0	0	0	0	0	0	1002	0	0	0	0	0	0	3262	0	0	0	0	0	0	0	0
56	>1.00_Cunner_Tetragolabrus_adspersus	ACTATGCCTAGCCGTAAACATTGATAGTACATTACATTTGCTATCCGCCCGGGTACTACGAGCATAAGCTTAAAACCCAAAGGACTTGGCGGTGCTTTAGATCCAC	1	S	15850	18	11458	10	2943	6	1083	1	366	1		0	0	0	0	879	0	0	0	0	0	0	0	0	0	457	543	0	0	2244	0	0	0	2241	0	0	1122	0	0	0	0	0	0	0	0
196	>1.00_Weakfish_Cynoscion_regalis	ACTATGCTTAGCCTTAAACATTGACAACAACATACACCTGTTGTCCGCCTGGGTACTACGAGCATTAGCTTAAAACCCAAAGGACTTGGCGGTGCTTTAGACCCAC	1	S	13581	19	9791	10	3315	7	475	2	0	0		0	0	0	0	0	2609	0	0	0	313	0	0	0	0	0	0	0	1483	2565	1250	0	0	0	0	0	0	0	0	0	28	0	0	0	0
3	>1.00_American_butterfish_Peprilus_triacanthus	ACTATGCTTAGCCGTAAACATTGATAGAGATTTACACCTTCTATCCGCCTGGGAACTACGAGCATTAGCTTAAAACCCAAAGGACTTGGCGGTACTTTAGATCCCC	1	S	13188	19	8827	10	4361	9	0	0	0	0		0	0	0	0	652	2282	0	0	1303	650	290	0	370	0	0	0	0	0	0	868	0	0	0	0	0	0	0	0	0	0	0	0	0	0
160	>1.00_Smallmouth_flounder_Etropus_microstomus	ACTATGCTTAGCCCTAAACATAGAATAAACTTTACTTAATATACTCCGCCCGGGTATTACGAGCATCAGCTTAAAACCCAAAGGACTTGGCGGTGCTTTACATCCAC	1	S	11268	15	6288	7	4100	6	880	2	0	0		0	0	0	196	0	641	0	0	2837	0	88	0	0	0	0	0	0	0	0	0	0	0	0	0	0	526	0	0	0	0	0	0	0	0
116	>1.00_Northern_puffer_Sphoeroides_maculatus	ACTATGCTTAGCCCTAAACAATGATACTTACATACATCCACCATCCGCCCGGGTACTACGAGCATTAGCTTAAAACCCAAAGGACTTGGCGGTGCTTTAAAACCAT	1	S	11004	23	2479	4	1518	3	4639	8	2368	8		0	0	0	0	0	0	0	0	0	0	0	0	0	0	0	217	0	0	0	0	0	0	0	0	0	0	0	0	0	0	0	0	994	0
138	>1.00_Rainbow_trout_or_Salmon_sp_Oncorhynchus_sp	ACTATGCCTAGCCGTAAACCTTGATAGAAATATACAATTGATATCCGCCAGGGAACTACAAGCGCCAGCTTAAAACCCAAAGGACTTGGCGGTGCCTCAGACCCAC	1	M	10556	5	0	0	1280	3	8018	1	1258	1		0	0	0	0	0	0	0	0	0	0	0	0	0	0	0	0	0	0	0	0	0	0	0	0	0	0	0	0	0	0	0	0	0	0
117	>1.00_Northern_sea_robin_Prionotus_carolinus	ACTATGCTTAGCCCCAAACATTGATAGCACACCACATATGCTATCCGCCCGGGAAGTAAGTGCACGAGCTTGAAACCCAAAGGACTTGGCGGTGCTTTAGATCCCC	1	S	10389	14	5231	8	4090	4	1068	2	0	0		0	0	0	0	0	2401	0	1884	0	304	156	0	107	234	0	0	0	0	0	0	0	0	0	0	0	0	0	0	0	0	0	0	0	0
182	>1.00_Thread_herring_Opisthonema_oglinum	ACTATGCCCTGCCGTAAACTTAGATATTTCAATACAATAAATATCCGCCCGGGGACTACGAGCGCCAGCTTAAAACCCAAAGGACTTGGCGGTGCTTCAGACCCCC	1	S	8740	11	6725	8	2015	3	0	0	0	0		0	0	0	0	0	0	0	0	395	0	0	301	0	530	1760	0	0	0	393	0	0	0	0	0	0	0	0	0	0	0	0	0	0	0
127	>1.00_Oyster_toadfish_Opsanus_tau	ACTATGTTTAGTCGTAAACTTAGTAGCCGCCAGGATACTACGAGCAACTGCTTAAAAACCAAAGGACCTGGCGGTGCTTTACTCCCC	1	S	7158	18	1237	3	0	0	5921	15	0	0		0	0	0	0	0	0	0	0	0	0	0	0	0	0	0	371	0	0	0	0	0	0	0	0	0	0	0	0	0	0	0	0	0	0
15	>1.00_Atlantic_herring_Clupea_harengus	ACTATGCCCCGCCGTAAACTTAGATATATTAGTACAACAAATATCCGCCCGGGAACTACGAGCGCCAGCTTAAAACCCAAAGGACTTGGCGGTGCTTCAGACCCCC	1	S	7029	9	4602	5	1312	2	1115	2	0	0		0	0	0	0	0	1460	0	0	0	0	0	0	0	0	0	0	0	0	0	0	0	1776	0	0	0	0	0	0	0	0	0	0	0	0
13	>1.00_Atlantic_croaker	ACTATGCTTAGCCCTAAACATTGACAACAATATACACCTGTTGTCCGCCTGGGAACTACGAGCATCAGCTTAAAACCCAAAGGACTTGGCGGTGCTTTAGACCCAC	1	S	7018	10	2681	5	22	1	4315	4	0	0		0	0	0	0	0	0	0	0	0	0	0	0	486	338	0	0	0	0	0	0	0	0	0	0	0	0	0	0	0	0	0	0	0	0
67	>1.00_Flathead_grey_mullet_Mugil_cephalus	ACTATGCCCAGCCCTAAACTTTGATAATTTATCACACTCATTATCCGCCTGGGAACTACGAGCTTCAGCTTTAAACCCAAAGGACTTGGCGGTGCTTAAGATCCAC	1	S	6947	8	335	1	220	1	3212	4	3180	2		0	0	0	0	0	0	0	0	0	0	0	0	0	0	0	0	0	335	0	0	0	0	0	0	0	0	0	0	0	0	0	0	0	0
174	>1.00_Striped_cusk_eel_Ophidon_marginatum	ACTATGCTAAGCCTTAAACATAGACATACTCTGTCCGCCAGGGTATTACGAGCATCAGCTTAAAACCCAAAGGACTTGGCGGTACTTTACACCCAC	1	S	5707	12	3220	5	2487	7	0	0	0	0		0	0	0	0	0	0	0	0	0	204	59	0	0	0	0	0	0	1316	0	0	0	0	0	0	0	0	0	0	0	0	0	0	0	0
76	>1.00_Golden_tilefish_Lopholatilus_chamaeleonticeps	ATTATGCTTAGCCGTAAACATCGACAGCATTTTATACCCGCTGTCCGCCCGGGGACTACGAGCAACAGCTTAAAACCCAAAGGACTTGGCGGTGCTTTAGTCCCAC	1	S	5669	4	4902	1	418	1	337	1	12	1		0	0	0	0	0	0	0	0	0	0	0	0	0	0	0	0	0	0	0	0	0	0	0	0	0	0	0	0	0	0	0	0	0	0
114	>1.00_Northern_pipefish96_Syngnathus_fuscus96	ACTATGCATAACCGTAAACACCGATGGCAATTTACTCGCAATCCGCCAGGGAACTACAAGCACTAGCTTGAAACCCAAAGGACTTGGCGGTGCTTTAGACCCAC	1	U	5144	8	233	1	0	0	3503	5	1408	2		0	0	0	0	0	0	0	0	0	0	233	0	0	0	0	0	0	0	0	0	0	0	0	0	0	0	0	0	0	0	0	0	0	0
130	>1.00_Pacific_sand_lance_Ammodytes_hexapterus	ACTATGCTTAGCCCTAAACATCGATAGCGCAATACACCTGCTATCCGCCTGGGAACTACGAGCATCAGCTTGAAACCCAAAGGACTTGGCGGTGCTTTAGATCCAC	1	S	4677	6	4352	4	325	2	0	0	0	0		0	0	0	0	0	0	0	0	0	0	0	0	0	0	0	0	0	0	0	0	0	0	0	0	0	0	0	0	0	0	0	685	0	0
1	>1.00_Agujon_needlefish_Tylosurus_acus	ACTATGCACAGCCCTAAACTTTGATAGAAACATTACACCCACTATCCGCCAGGGTACTACGAGCTCTAGCTTAAAATCCAAAGGACTTGGCGGTGCTTTAGACCCAC	1	S	4609	7	1132	2	1799	2	1678	3	0	0		0	0	0	0	0	0	0	0	0	0	0	0	0	0	0	0	0	0	0	0	0	0	0	0	0	0	0	0	0	0	0	0	0	913
161	>1.00_Southern_kingfish_Menticirrhus_americanus	ACTATGCTTAGTCGTAAACATTGACAACAACACACACCTGTTGTCCGCCTGGGAACTACGAGCGCCAGCTTAAAACCCAAAGGACTTGGCGGTGCTTTAGATCCAC	1	S	4125	3	0	0	4125	3	0	0	0	0		0	0	0	0	0	0	0	0	0	0	0	0	0	0	0	0	0	0	0	0	0	0	0	0	0	0	0	0	0	0	0	0	0	0
176	>1.00_Striped_sea_robin_Prionotus_evolans	ACTATGCTTAGCCCTAAACATTGGCAGCACACCACATATGCTGCCCGCCTGGGAAGTAAGAGCACCAGCTTGAAACCCAAAGGACTTGGCGGTGCTTTAGATCCCC	1	S	3776	10	1733	5	16	1	1838	3	189	1		0	0	0	381	0	0	0	0	0	0	0	0	0	0	0	0	0	0	0	0	470	0	0	0	0	0	0	0	327	32	0	0	523	0
151	>1.00_Scup_Stenotomus_chrysops	ACTATGCTTAGCCATAAACATTGACAGTCTACTACATTTTCTGTCCGCCCGGGAACTACGAGCATTAGCTTAAAACCCAAAGGACTTGGCGGTGCTTTAGACCCAC	1	S	3750	4	3604	3	146	1	0	0	0	0		0	0	0	0	0	0	0	0	0	0	0	0	0	0	0	0	0	0	0	0	0	0	0	0	0	1359	0	0	0	0	0	0	0	0
120	>1.00_Northern_stargazer	ACTATGCCTTGCCCTAAACATAGATGGTAAAATACAACTTCCATCCGCCAGGGAACTACGAGCGTAAGCTTAAAACCCAAAGGACTTGGCGGTGCTTTAGACCCCC	1	S	3738	7	2414	3	1324	4	0	0	0	0		0	0	0	0	0	0	0	0	0	0	0	0	0	0	0	0	0	983	0	0	0	0	0	0	0	0	0	0	0	0	0	349	0	1082
55	>1.00_Crested_blenny95_Hypleurochilus_germinatus95_refseq_not_full_length	ACTATGCTTAGCCTTAAACTTAGATAATACTATTACACCCATTATCCGCCCGGGTACTACGAGCACTAGCTTAAAACCCAAAGGACTTGGCGGTGCTTAATAACCCC	1	U	3539	8	2365	3	1174	5	0	0	0	0		0	0	0	0	0	0	0	0	0	0	0	0	0	0	0	0	0	0	875	0	0	0	0	0	0	0	0	0	0	0	0	0	0	0
180	>1.00_Swordfish_Xiphias_gladius	ACTATGCTTAGCCCTAAACATCGATTATTAATTACACCCAATATCCGCCCGGGAATTACGAGCATCAGTTTAAAACCCAAAGGACTTGGCGGTGCTTAACATCCAC	1	S	3382	5	2580	2	489	1	252	1	61	1		0	0	0	0	0	0	0	0	0	0	0	0	0	0	0	0	0	0	632	0	0	0	0	0	0	0	0	0	0	0	0	0	0	0
6	>1.00_American_gizzard_shad_Dorosoma_cepedianum	ACTATGCCCTGCCGTAAACTTAGATATTTCAATACAACAAATATCCGCCCGGGGACTACGAGCGCCAGCTTAAAACCCAAAGGACTTGGCGGTGCTTCAGACCCCC	1	S	3334	3	2926	2	408	1	0	0	0	0		0	0	0	0	0	0	0	0	0	0	0	0	0	0	0	0	0	0	0	0	0	196	0	0	0	0	0	0	0	0	0	2730	0	0
173	>1.00_Striped_burrfish_Chilomycterus_schoepfi	ACTATGCCTAGCCCTAAACATTGACAGTAAATTCACCAACTGTTCGCCCGGGAACTACGAGCACCAGCTTAAAACCCAAAGGACTTGGCGGTGCTTTAGACCCAC	1	S	3291	6	2720	4	323	1	248	1	0	0		0	0	0	0	0	469	0	1362	0	0	0	0	0	0	0	0	0	0	0	0	0	0	0	0	0	0	0	0	0	0	0	0	0	0
20	>1.00_Atlantic_needlefish_Strongylura_marina	ACTATGCATAGCCCTAAACCTTGATAGAATTTTACACCCCCTATCCGCCAGGATACTACGAGCCCCAGCTTAAAATCCAAAGGACCTGGCGGTGCTTTAGACCCAC	1	S	3064	22	0	0	0	0	1972	14	1092	8		0	0	0	0	0	0	0	0	0	0	0	0	0	0	0	0	0	0	0	0	0	0	0	0	0	0	0	0	0	0	0	0	0	0
66	>1.00_Flagfin_mojarra_Eucinostomus_melanopterus	ACTATGCTTAGCCCTAAACACAGATAAAACCTCACTTATTTTTATCCGCCCGGGTACTACGAGCATCAGCTTGAAACCCAAAGGACTTGGCGGTACTTCAGACCCAT	1	S	2838	2	0	0	0	0	2730	1	108	1		0	0	0	0	0	0	0	0	0	0	0	0	0	0	0	0	0	0	0	0	0	0	0	0	0	0	0	0	0	0	0	0	0	0
147	>1.00_Red_White_or_Spotted_hake_sp_Urophycis_sp	ACTATGTGTGGTCCTCAACATCGATAATTATTGTACTTAAATTATCCGCCCGGGAACTACGAGCATTAGCTTAAAACCCAAAGGACTTGGCGGTGCTTTAGACCCCC	1	M	2614	18	1372	10	198	5	679	2	365	1		0	0	0	70	0	0	0	0	0	0	0	0	0	74	0	23	0	0	0	414	0	0	0	0	0	141	0	0	0	5	0	0	0	0
19	>1.00_Atlantic_moonfish_Selene_setapinnis	ACTATGCTTAGCCTTAAACATTGATCGTTTACCACATCAAACATCCGCCTGGGGATTACGAACACTAGTTTAAAACCCAAAGGACTTGGCGGTGCTTAACATCCAC	1	S	2231	3	979	1	0	0	358	1	894	1		0	0	0	0	0	0	0	0	0	0	0	0	0	0	0	0	0	0	979	0	0	0	0	0	0	0	0	0	0	0	0	0	0	0
71	>1.00_Fourspot_flounder_Hippoglossina_oblonga	ACTATGCTTAGCCCTAAACATCGATTGTAAAATACACTCAAAATCCGCCCGGGTATTACGAACATTAGTTTAAAACCCAAAGGACTTGGCGGTGCTTAACATCCAC	1	S	2081	4	1901	3	180	1	0	0	0	0		0	0	0	0	0	0	0	303	0	0	0	0	0	0	0	0	0	0	0	0	0	0	0	0	0	0	0	0	0	0	0	653	0	0
2	>1.00_American_anglerfish_Lophius_americanus	ACTATGCCTAGCCCTAAACATTGGCAACACAAAACACCCGTTGCCCGCCAGGGCACTACGAGCATTAGCTTAAAACCCAAAGGACTTGGCGGTGCTTTAGACCCAC	1	S	2049	7	1473	5	0	0	576	2	0	0		0	0	0	0	0	0	0	0	0	0	0	0	0	0	0	0	0	0	0	0	0	0	0	0	0	0	0	0	0	0	0	350	995	0
172	>1.00_Striped_blenny_Chasmodes_bosquianus	ACTATGCTTAGCCTTAAACTTAGTTAGTATATTACATACACACCCGCCTGGGAACTACGAGCATTAGCTTAAAACCCAAAGGACTTGGCGGTGCTTAACACCCCC	1	S	1820	8	0	0	0	0	1114	4	706	4		0	0	0	0	0	0	0	0	0	0	0	0	0	0	0	0	0	0	0	0	0	0	0	0	0	0	0	0	0	0	0	0	0	0
131	>1.00_Pacific_worm_eel97_Myrophis_wafer97	ACTATGCCTAATTGTAAACAATGACGGGAAAGTACAAAACCCGTCCGCCAGGGGACTACGAGCGCTAGCTTAAAACCCAAAGGACTTGGCGGTGCCTCAAACCCAC	1	U	1521	3	722	1	0	0	531	1	268	1		0	0	0	0	0	0	0	0	0	0	0	0	0	0	0	0	0	0	0	0	0	722	0	0	0	0	0	0	0	0	0	0	0	0
192	>1.00_Unknown_fish_Stiphodon_alcedo93	ACTATGCCTAGCCATAAACACAGGTGAATACATCACACCTATCACTTGCCCGGAAACTACGAGCCCCAGCTTAAAACCCAAAGGACTTGGCGGTGCTTTAGACCCAC	1	U	1449	3	749	1	700	2	0	0	0	0		0	0	0	0	0	0	0	0	0	0	0	0	0	0	0	749	0	0	0	0	0	0	0	0	0	0	0	0	0	0	0	0	0	0
4	>1.00_American_conger_Conger_oceanicus	ACTATGCTTAACTGTAAACAAAGATGATAATACACAAACATCATCCGCCAGGGGATTACGAGCAAAGTTTAAAACCCAAAGGACTTGGCGGTGCCTCAAACCCAC	1	S	1091	5	344	1	0	0	341	2	406	2		0	0	0	0	0	0	0	0	0	0	0	0	0	0	0	0	0	0	0	0	0	0	0	0	0	0	0	0	0	0	0	0	0	0
85	>1.00_Grey_triggerfish_Balistes_capriscus	ACTATGCCTAGCCTTAAACATCGATGGCCACTTACTTAAACCATCCGCCAGGGAACTACGAGCATTAGCTTAAAACCCAAAGGACTTGGCGGTGCTTTAGATCCAC	1	S	1081	1	0	0	0	0	1081	1	0	0		0	0	0	0	0	0	0	0	0	0	0	0	0	0	0	0	0	0	0	0	0	0	0	0	0	0	0	0	0	0	0	0	0	0
65	>1.00_Feather_blenny_Hypsoblennius_hentz	ACTATGCTTAGCCTTAAACTTAGATAATAGATTACCTAAATTATCCGCCTGGGGACTACGAGCACTAGCTTAAAACCCAAAGGACTTGGCGGTGCTTAATAACCCC	1	S	1060	3	150	1	0	0	577	1	333	1		0	0	0	0	0	0	0	0	0	0	0	0	0	0	150	0	0	0	0	0	0	0	0	0	0	0	0	0	0	0	0	0	0	0
95	>1.00_Jack_family_caranx_ignobilis99	ACTATGCTTAGCCTTAAACATTGATCGTTTACTACATCAAACATCCGCCCGGGAATTACGAACATTAGTTTAAAACCCAAAGGACTTGGCGGTGCTTAACATCCAC	1	U	988	2	663	1	325	1	0	0	0	0		0	0	0	0	0	0	0	0	0	0	0	0	0	0	0	0	0	0	0	0	0	0	0	0	0	0	0	0	0	0	0	0	0	0
44	>1.00_Butterfly_mackerel_Gasterochisma_melampus	ACTATGCCTAGCCATAAACATTGATAGAATTTTACACCCTCTATCCGCCTGGGTACTACGAGCATTAGCTTGAAACCCAAAGGACTTGGCGGTACTTTAGATCCCC	1	S	781	1	781	1	0	0	0	0	0	0		0	0	0	0	0	0	0	0	0	0	0	0	0	0	0	0	0	0	781	0	0	0	0	0	0	0	0	0	0	0	0	0	0	0
118	>1.00_Northern_sennet_Sphyraena_borealis	ACTATGCTCAGCCCTAAACATTGATTGGACTCTACAACCCCAATCCGCCTGGGAATTACGAACATAAGTTTAAAACCCAAAGGACTTGGCGGTGCTTTATATCCCC	1	S	641	1	641	1	0	0	0	0	0	0		0	0	0	0	0	0	0	0	0	0	0	0	0	0	0	0	0	0	0	0	0	0	0	0	0	0	0	0	0	0	0	0	0	0
45	>1.00_Capelin_Mallotus_villosus	ACTATGCTTAGCCATAAACTTTGATGTTAATTTACACCTAATATCCGCCAGGGAACTACAAGCGTTAGCTTAAAACCCAAAGGACTTGGCGGTGCCTCACACCCAC	1	S	607	1	0	0	0	0	607	1	0	0		0	0	0	0	0	0	0	0	0	0	0	0	0	0	0	0	0	0	0	0	0	0	0	0	0	0	0	0	0	0	0	0	0	0
132	>1.00_Pinfish_Lagodon_rhomoboides	ACTATGCTTAGCCATAAACATTGACAGTATATTACATTTTCTGTCCGCCTGGGAACTACAAGCATTAGCTTAAAACCCAAAGGACTTGGCGGTGCTTTAGACCCAC	1	S	529	1	0	0	0	0	529	1	0	0		0	0	0	0	0	0	0	0	0	0	0	0	0	0	0	0	0	0	0	0	0	0	0	0	0	0	0	0	0	0	0	0	0	0
98	>1.00_Ladyfish98_Elops_saurus98	ACTATGCTTGGCCGTAAACCTTGATGATAAGGCACAAATATCATCCGCCAGGGGACTACAAGCGTCAGCTTAAAACCCAAAGGACTTGGCGGTGCCCCACACCCAC	1	U	515	1	515	1	0	0	0	0	0	0		0	0	0	0	0	0	0	0	0	0	0	0	0	0	515	0	0	0	0	0	0	0	0	0	0	0	0	0	0	0	0	0	0	0
21	>1.00_Atlantic_salmon_Salmo_salar	ACTATGCCTAGCCGTAAACTTTGATGGAAACATACAACTGACATCCGCCAGGGGACTATAAGCGCCAGCTTAAAACCCAAAGGACTTGGCGGTGCCTCAGACCCAC	1	S	495	1	0	0	0	0	0	0	495	1		0	0	0	0	0	0	0	0	0	0	0	0	0	0	0	0	0	0	0	0	0	0	0	0	0	0	0	0	0	0	0	0	0	0
103	>1.00_Lined_seahorse_Hippocampus_erectus	ACTATGCATAGTCTTAAACAAAAGTATTTTAATTACATCATACTCGCCAGGGTACTACGAGCTTTAGCTTAAAACCCAAAGGACTTGGCGGTGCTTTACACCCAC	1	S	463	4	0	0	0	0	351	2	112	2		0	0	0	0	0	0	0	0	0	0	0	0	0	0	0	0	0	0	0	0	0	0	0	0	0	0	0	0	0	0	0	0	0	0
183	>1.00_Three-spined_stickleback_Gasterosteus_aculeatus	ACTATGCCTAGCCCTAAACATTGATAGAATTTTACAACCACTATCCGCCCGGGGACTACAAGCATCAGCTTGAAACCCAAAGGACTTGGCGGTGCTTTAGATCCAC	1	S	384	1	0	0	384	1	0	0	0	0		0	0	0	0	0	0	0	0	0	0	0	0	0	0	0	0	0	0	0	0	0	0	0	0	0	0	0	0	0	0	0	0	0	0
50	>1.00_Cobia_Rachycentron_canadum	ACTATGCTTAGCCTTAAACATTGATCATTTATTACATAAAACATCCGCCTGGAAATTACGAACGTCAGTTTAAAACCCAAAGGACTTGGCGGTGCTTAACATCCAC	1	S	353	1	353	1	0	0	0	0	0	0		0	0	0	0	0	0	0	0	0	0	0	0	0	0	0	0	0	0	0	0	0	0	0	0	0	0	0	0	0	0	0	0	0	0
186	>1.00_Tomcod_Microgadus_tomcod	ACTATGTATGGTTGTTAACATCGATGGTTTTATACCCAAACCATCCGCCTGGGGACTACGAGCAATAGCTTAAAACCCAAAGGACTTGGCGGTGCTTTAGACCCCC	1	S	333	1	333	1	0	0	0	0	0	0		0	0	0	0	0	0	0	0	0	0	0	0	0	0	0	0	0	0	0	0	0	0	0	0	0	0	0	0	0	0	333	0	0	0
107	>1.00_Mahi_mahi_Coryphaena_hippurus	ACTATGCTTAGCCCTAAACATTGACTGTTTATTACATAAACATCCGCCTGGGAACTACGAACATTAGTTTAAAACCCAAAGGACTTGGCGGTGCTTAATATCCAC	1	S	328	1	0	0	328	1	0	0	0	0		0	0	0	0	0	0	0	0	0	0	0	0	0	0	0	0	0	0	0	0	0	0	0	0	0	0	0	0	0	0	0	0	0	0
134	>1.00_Pollock_Polachius_virens	ACTATGTATGGTCGTTAACATTGATGGTTTTATACCCAAACCATCCGCCTGGGGACTACGAGCAATAGCTTAAAACCCAAAGGACTTGGCGGTGCTTTAGACCCCC	1	S	323	1	0	0	0	0	323	1	0	0		0	0	0	0	0	0	0	0	0	0	0	0	0	0	0	0	0	0	0	0	0	0	0	0	0	0	0	0	0	0	0	0	0	0
184	>1.00_Tidewater_mojarra_Eucinstomus_harengulus	ACTATGCTTAGCCCTAAATACAGATAAAATTACACTTTACTTTATCCGCCCGGGTACTACGAGCATTAGCTTGAAACCCAAAGGACTTGGCGGTGCTTTAGACCCAT	1	S	230	1	0	0	0	0	230	1	0	0		0	0	0	0	0	0	0	0	0	0	0	0	0	0	0	0	0	0	0	0	0	0	0	0	0	0	0	0	0	0	0	0	0	0
12	>1.00_Atlantic_cod_and_other_gadidae	ACTATGTATGGTCGTTAACATTGATGGTTTTATACCCAAACCATCCGCCTGGGAACTACGAGCAATAGCTTAAAACCCAAAGGACTTGGCGGTGCTTTAGACCCCC	1	S	159	1	0	0	159	1	0	0	0	0		0	0	0	0	0	0	0	0	0	0	0	0	0	0	0	0	0	0	0	0	0	0	0	0	0	0	0	0	0	0	0	0	0	0
165	>1.00_Spotfin_mojarra_Eucinostomus_argentatus	ACTATGCTTAGCCCTAAATATAGATAAAGCCTCACCTTTGACTTTATCCGCCAGGGTACTACGAGCGCTAGCTTAAAACCCAAAGGACTTGGCGGTGCTTCAAACCCAA	1	S	137	1	0	0	0	0	0	0	137	1		0	0	0	0	0	0	0	0	0	0	0	0	0	0	0	0	0	0	0	0	0	0	0	0	0	0	0	0	0	0	0	0	0	0
89	>1.00_Halfbeak_sp98_Hemiramphus_sp98	ACTATGCTCAGCCATAAACCTAGATAAAATTTTACATATATTATCCGCCAGGGTACTACGAGCGCTAGCTTAAAACCCAAAGGACTTGGCGGTGCTTCAAACCCAC	1	U	106	1	0	0	0	0	106	1	0	0		0	0	0	0	0	0	0	0	0	0	0	0	0	0	0	0	0	0	0	0	0	0	0	0	0	0	0	0	0	0	0	0	0	0
153	>1.00_Sea_lamprey_Petromyzon_marinus	GCTATGCCTGCCATAAATAAACAACCGTCGCCAGGGCACTACGAACAATCGTTTAAAACCCAAAGAACTTGACGGCACCCTAAACCCAC	1	S	106	1	0	0	106	1	0	0	0	0		0	0	0	0	0	0	0	0	0	0	0	0	0	0	0	0	0	0	0	0	0	0	0	0	0	0	0	0	0	0	0	0	0	0
91	>1.00_Hogchoker_trinectes_maculatus	ACTATGCTTAGCCGTAAACATTGATTATACCAATACACAATAATCCGCCCGGGAATTACGAACAAAAGTTTAAAACCCAAAGGACTTGGCGGTGCTTAACATCCAC	1	S	81	1	0	0	81	1	0	0	0	0		0	0	0	0	0	0	0	0	0	0	0	0	0	0	0	0	0	0	0	0	0	0	0	0	0	0	0	0	0	0	0	0	0	0
235	>1.01_Winter_skate_or_Little_skate_Leucoraja_ocellata_or_erinacea	ACTATGCTTAACCATAAATAGACCTTTACCACTACTTACTTTGTTTAAGTCCGCCTGAGTACTACAAGCGCTAGCTTAAAACCCAAAGGACTTGGCGGTGCCCCAGACCCCC	1.01	M	172213	27	3341	3	167285	22	0	0	1587	2		0	0	0	0	0	0	0	0	0	0	0	0	0	0	0	0	0	0	565	350	0	0	0	0	0	0	2426	0	0	0	0	0	0	0
220	>1.01_Clearnose_skate_Raja_eglanteria	ACTATGCCTAACCATAAATAGACCCTACCACTACTTACCTTGTCTAAGTCCGCCCGAGTACTACAAGCGCTAGCTTAAAACCCAAAGGACTTGGCGGTGCCCCAGACCCCC	1.01	S	124007	24	60	3	21700	18	419	1	101828	2		0	0	0	0	0	0	0	0	0	0	0	0	0	0	0	0	0	7	0	0	0	0	0	0	0	0	0	0	0	0	0	0	0	0
217	>1.01_Brazilian_cownose_ray_Rhinoptera_brasiliensis	ACTATGCTCAACCATAAACATTGTTACTAATAATTTACCTTAATACCCGCCCGAGTACTACAAGCGCTAGCTTAAAACCCAAAGGACTTGGCGGTGCTCCAAATCCAC	1.01	S	67094	16	212	3	66882	13	0	0	0	0		0	0	0	0	0	0	0	113	0	0	0	0	0	0	0	0	0	0	0	0	0	0	0	0	0	0	0	0	0	0	0	0	0	0
216	>1.01_Bluntnose_stingray_Dasyatis_say	ACTATGCTTAACCATAAACATTGTTATAAATAAACCTACCTTAACATACCGCCTGAATACTACAAGCGCTAGCTTAAAATCCAAAGGACTTGGCGGTGCTCCATACCCAC	1.01	S	27224	20	0	0	7091	4	1710	3	18423	13		0	0	0	0	0	0	0	0	0	0	0	0	0	0	0	0	0	0	0	0	0	0	0	0	0	0	0	0	0	0	0	0	0	0
226	>1.01_Smooth_dogfish_Mustelus_canis	ACTATGTCCAACCACAAACTTAGACAATAAATCACTATATTGTTCGCCCGAGTACTACAAGCGCTAGCTTAAAACCCAAAGGACTTGGCGGTATCCCATACCCAC	1.01	S	25090	16	148	1	24910	14	0	0	32	1		0	0	0	0	0	0	0	0	0	0	0	0	0	0	0	0	0	0	0	0	0	0	0	0	0	0	0	0	0	0	0	0	148	0
218	>1.01_Bullnose_ray_Myliobatis_freminvillii	ACTATGCTTAACTATAAACATTGTTATTAATGAACTTACCTTAATATCCGCCCGAGTACTACAAGCGCTAGCTTAAAACCCAAAGGACTTGGCGGTGCTCCAAATCCCC	1.01	S	24499	15	201	3	24298	12	0	0	0	0		0	0	0	0	0	0	0	0	0	0	0	0	0	0	0	0	0	0	0	0	0	0	0	0	0	0	0	0	0	0	0	0	0	0
221	>1.01_Cownose_ray_Rhinoptera_bonasus	ACTATGCTCAACCATAAACATCGTTACTAATGATTTACCTTAATACCCGCCCGAGTACTACAAGCGCTAGCTTAAAACCCAAAGGACTTGGCGGTGCTCCAAACCCAC	1.01	S	18464	21	0	0	16300	13	26	1	2138	7		0	0	0	0	0	0	0	0	0	0	0	0	0	0	0	0	0	0	0	0	0	0	0	0	0	0	0	0	0	0	0	0	0	0
229	>1.01_Spiny_dogfish_Squaalus_acanthias	ACTATGCCCAACCACAAACTTAGACAATAACCTACTACATTGTCCGCCAGAGTACTACAAGCGCTAGCTTAAAACCCAAAGGACTTGGCGGTGCTTCAGACCCCC	1.01	S	12298	8	22	1	12276	7	0	0	0	0		0	0	0	0	0	0	0	0	0	0	0	0	0	0	0	0	0	0	0	22	0	0	0	0	0	0	0	0	0	0	0	0	0	0
223	>1.01_Roughtail_stingray_Dasyatis_centroura	ACTATGCTTAACCGTAAACATTGTTACAAGCATATTTACCTTAATACACCGCCTGAACACTACAAGCGCTAGCTTAAAATCCAAAGGACTTGGCGGTGCTCCAAACCCAC	1.01	S	10099	8	6	1	10093	7	0	0	0	0		0	0	0	0	0	0	0	0	6	0	0	0	0	0	0	0	0	0	0	0	0	0	0	0	0	0	0	0	0	0	0	0	0	0
224	>1.01_Sandbar_shark_Carcharhinus_plumbeus	ACTATGCTCAACCACAAACTTAAACAACATCCTACTATATTGTTCGCCAGAGTACTACAAGCGCTAGCTTAAAACCCAAAGGACTTGGCGGTATCCCATACCCAC	1.01	S	3202	4	0	0	3202	4	0	0	0	0		0	0	0	0	0	0	0	0	0	0	0	0	0	0	0	0	0	0	0	0	0	0	0	0	0	0	0	0	0	0	0	0	0	0
228	>1.01_Spiny_butterfly_ray_Gynmura_altavela	ACTATGCTTAACTATAAACATTGCTATTAATAAATATACCTTAATATCCGCCTGAGTACTACAAGCGCTAGCTTAAAACCCAAAGGACTTGGCGGTGCTCCACACCCAC	1.01	S	3071	8	0	0	3071	8	0	0	0	0		0	0	0	0	0	0	0	0	0	0	0	0	0	0	0	0	0	0	0	0	0	0	0	0	0	0	0	0	0	0	0	0	0	0
232	>1.01_Unknown_ray_sp95	ACTATGCTTAACCGTAAACATTGTTACAAATAAATTTACCTTAACACACCGCCTGAATACTACAAGCGCTAGCTTACAATCCAAAGGACTTGGCGGTGCTCCAAACCCAC	1.01	U	975	1	0	0	975	1	0	0	0	0		0	0	0	0	0	0	0	0	0	0	0	0	0	0	0	0	0	0	0	0	0	0	0	0	0	0	0	0	0	0	0	0	0	0
233	>1.01_Unknown_shark_sp_shark96B	ACTATGCCCAACCATAAACTTAGACAACACTCCACTATATTGTTCGCCAGAATACTACAAGCGCTAGCTTAAAACCCAAAGGACTTGACGGTATCCCACACCCAC	1.01	U	746	1	0	0	746	1	0	0	0	0		0	0	0	0	0	0	0	0	0	0	0	0	0	0	0	0	0	0	0	0	0	0	0	0	0	0	0	0	0	0	0	0	0	0
212	>1.01_Atlantic_sharpnose_shark_Rhizoprionodon_terraenovae	ACTATGCCCAACCATAAACTTAGACAACACTCCACTATATTGTTCGCCAGAATACTACAAGCGCTAGCTTAAAACCCAAAGGACTTGGCGGTATCCCACACCCAC	1.01	S	148	1	0	0	148	1	0	0	0	0		0	0	0	0	0	0	0	0	0	0	0	0	0	0	0	0	0	0	0	0	0	0	0	0	0	0	0	0	0	0	0	0	0	0
231	>1.01_Unknown_ray94c	ACTATGCTTAACCATAAACATCGTTATAAACAAACCTACCTTAATACACCGCCTGAATACTACAAGCGCTAGCTTACAATCCAAAGGACTTGGCGGTGCTCCAAACCCAC	1.01	U	109	1	0	0	109	1	0	0	0	0		0	0	0	0	0	0	0	0	0	0	0	0	0	0	0	0	0	0	0	0	0	0	0	0	0	0	0	0	0	0	0	0	0	0
[truncated: 202 more columns]

## Sheet: Table 9 Other vert detections
TABLE 9. Other vertebrate eDNA
							MiSeq run	2017 06 jun-96	2017 06 jun-96	2017 06 jun-96	2017 06 jun-96	2017 06 jun-96	2017 11 nov-92	2017 11 nov-92	2017 11 nov-92	2017 11 nov-92	2017 11 nov-92	2017 11 nov-92	2017 11 nov-92	2017 11 nov-92	2017 11 nov-92	2018 01 jan-86	2018 01 jan-86	2018 01 jan-86	2018 01 jan-86	2018 01 jan-86	2018 01 jan-86	2018 01 jan-86	2018 01 jan-86	2018 06 jun-92	2018 06 jun-92	2018 06 jun-92	2018 06 jun-92	2018 09 sep	2018 09 sep	2018 09 sep	2018 09 sep	2018 09 sep	2018 09 sep	2018 09 sep	2018 09 sep	2018 10 oct-96	2018 10 oct-96	2018 10 oct-96	2018 10 oct-96	2018 10 oct-96	2018 10 oct-96	2018 10 oct-96	2019 02 feb-96
							Site number	1	1	1	1	1	1	1	1	1	1	1	1	1	1	1	1	1	1	1	1	1	1	1	1	1	1	1	1	1	1	1	1	1	1	1	1	1	1	1	1	1	1
							Site name	BLO	BLO	BLO	BLO	BLO	BLO	BLO	BLO	BLO	BLO	BLO	BLO	BLO	BLO	BLO	BLO	BLO	BLO	BLO	BLO	BLO	BLO	BLO	BLO	BLO	BLO	BLO	BLO	BLO	BLO	BLO	BLO	BLO	BLO	BLO	BLO	BLO	BLO	BLO	BLO	BLO	BLO
							Collection date	2017-04-02	2017-04-16	2017-04-23	2017-05-14	2017-05-29	2017-06-11	2017-07-03	2017-07-09	2017-07-23	2017-08-06	2017-08-27	2017-09-04	2017-09-10	2017-09-17	2017-10-01	2017-10-14	2017-10-22	2017-10-29	2017-11-05	2017-11-19	2017-12-03	2017-12-23	2018-02-25	2018-03-03	2018-03-18	2018-03-25	2018-04-01	2018-04-08	2018-04-22	2018-04-29	2018-05-13	2018-05-20	2018-05-27	2018-06-03	2018-06-17	2018-06-24	2018-07-01	2018-07-08	2018-07-29	2018-08-05	2018-08-12	2018-08-20
							Primer name	AFAR	AFAR	AFAR	AFAR	AFAR	AFAR	AFAR	AFAR	AFAR	AFAR	AFAR	AFAR	AFAR	AFAR	AFAR	AFAR	AFAR	AFAR	AFAR	AFAR	AFAR	AFAR	AFAR	AFAR	AFAR	AFAR	AFAR	AFAR	AFAR	AFAR	AFAR	AFAR	AFAR	AFAR	AFAR	AFAR	AFAR	AFAR	AFAR	AFAR	AFAR	AFAR
REF SEQ #	TAXON NAME	SEQUENCE	CATEGORY	MATCH SINGLE, MULTIPLE, OR UNKNOWN SPECIES	TOTAL READS	TOTAL DETECTIONS	library	aq195Ajun2017	aq202Ajun2017	aq207Ajun2017	aq218Ajun2017	aq226Ajun2017	aq233AFAR20oct2017	aq239AFAR20oct2017	aq243AFAR20oct2017	aq247AFAR20oct2017	aq253AFAR20oct2017	aq255AFAR20oct2017	aq257AFAR20oct2017	aq259AFAR20oct2017	aq261AFAR20oct2017	265AFAR26jan2018	269AFAR26jan2018	274AFAR26jan2018	278AFAR26jan2018	288AFAR26jan2018	293AFAR26jan2018	297AFAR26jan2018	301AFAR26jan2018	311AFARjun2018	314AFARjun2018	327AFARjun2018	331AFARjun2018	335AFARsep2018	339AFARsep2018	345AFARsep2018	348AFARsep2018	352AFARsep2018	355AFARsep2018	358AFARsep2018	361AFARsep2018	367AFARoct2018	370AFARoct2018	373AFARoct2018	375AFARoct2018	380AFARoct2018	383AFARoct2018	388AFARoct2018	392AFARfeb2019
352	>3.00_Human_mito1	ACTATGCTTAGCCCTAAACCTCAACAGTTAAATCAACAAAACTGCTCGCCAGAACACTACGAGCCACAGCTTAAAACTCAAAGGACCTGGCGGTGCTTCATATCCCT	3		1986483	141		3652	5335	3086	0	1524	19935	11012	3936	7407	15929	4577	4053	57998	19562	28918	4768	43650	37831	0	24562	10248	2610	5616	10651	0	0	62378	44966	3061	0	28689	0	45229	0	11827	2616	8178	3800	7383	4146	20927	0
276	>2.00_Dog_Canis_lupus_mito1	ACTATGCTTAGCCCTAAACATAGATAATTTTACAACAAAATAATTCGCCAGAGGACTACTAGCAATAGCTTAAAACTCAAAGGACTTGGCGGTGCTTTATATCCCT	2		329769	111		0	0	0	0	0	311	0	0	0	0	138	506	0	0	143	287	2769	2188	0	6900	7319	24695	9697	514	1656	1633	7820	5348	16168	738	0	0	8607	0	208	0	0	0	0	0	0	0
290	>2.00_Great_black_backed_gull_Larus_marinus	ACTATGCCTAGCCCTAAATCTCGATGCTTGCCGTACCAAAGCATCCGCCCGAGAACTACGAGCACAAACGCTTAAAACTCTAAGGACTTGGCGGTGCCCCAAACCCAT	2		156765	72		0	0	0	0	0	0	0	0	3769	0	0	1912	328	942	2916	0	405	2903	2314	0	0	1683	2111	0	0	632	1631	252	5568	0	0	0	0	0	0	0	0	0	0	0	440	0
259	>2.00_Canada_goose_other_geese_swans	ACTATGCCTGGCCCTAAATCTTGATACTTACTTTACCGAAGTATCCGCCAGAGAACTACGAGCACAAACGCTTAAAACTCTAAGGACTTGGCGGTGCCCCAAACCCAC	2		505481	60		0	0	0	0	0	0	0	0	0	0	0	0	0	0	0	0	0	0	0	0	1534	0	0	0	0	917	0	0	2123	0	0	0	0	0	0	0	0	0	0	0	0	0
258	>2.00_Bottlenose_dolphin_Tursiops_truncatus	ACTATGCTTAGTCGTAAACTTAAATAATCCTAAAACAAGATTATTCGCCAGAGTACTATCGGCAACAGCCCAAAACTCAAAGGACTTGGCGGTGCTTCATATCCTT	2		138248	48		0	0	574	1386	858	3592	0	10209	0	0	0	0	0	5933	953	1423	47	4434	3331	4347	0	0	0	0	0	235	3729	5015	835	171	0	3447	555	285	0	9434	0	9238	1206	0	0	0
303	>2.00_Mallard_other_Anas_sp	ACTATGCCTGGCCCTAAATCTTGATACTTACCCTACCGAAGTATCCGCCAGAGAACTACGAGCACAAACGCTTAAAACTCTAAGGACTTGGCGGTGCCCTAAACCCAC	2		323967	43		0	0	0	0	0	0	0	0	0	0	0	0	0	0	0	0	0	0	0	0	0	0	0	178	0	0	0	0	0	0	0	0	0	0	0	0	0	0	0	0	0	0
268	>2.00_Common_merganser_Mergus_merganser_prob_others	ACTATGCCTGGCCCTAAATCTTGATACTTACCATACCGAAGTATCCGCCAGAGAACTACGAGCACAAACGCTTAAAACTCTAAGGACTTGGCGGTGCCCTAAACCCAC	2		25436	22		0	0	0	0	0	0	0	0	0	0	0	0	0	0	0	0	0	0	0	0	0	0	0	0	0	0	0	0	0	0	0	0	0	0	0	0	0	0	0	0	0	0
333	>2.00_Sandpiper_like_Tringa_flavipes_like98	ACTATGCTTAGCCCTAAATCTTGATGCTCCTTCGTACTAAAGCATCCGCCTGAGAACTACGAGCACAAACGCTTAAAACTCTAAGGACTTGGCGGTGCCCTAAACCCAC	2		34288	20		0	0	0	0	0	0	0	0	0	0	0	0	189	0	0	0	716	590	9348	1910	0	0	0	0	0	0	0	0	0	0	0	0	0	0	0	0	0	0	0	0	0	0
300	>2.00_Laughing_gull_Larus_atricilla	ACTATGCCTAGCCCTAAATCTCGATGCTTGCCGTACCAAAGCATCCGCCCGAGAACTACGAGCACAAACGCTTAAAACTCTAAGGACTTGGCGGTGTCCCAAACCCAT	2		13333	19		0	0	0	0	0	0	0	0	952	0	0	0	0	0	0	244	148	0	0	0	0	0	0	0	0	0	0	0	1371	0	0	0	0	0	0	0	0	0	0	0	0	0
263	>2.00_Chimpanzee_Pan_troglodytes	ACTATGCTTAGCCCTAAACTTCAACAGTTAAATTAACAAAACTGCTCGCCAGAACACTACGAGCCACAGCTTAAAACTCAAAGGACCTGGCGGTGCTTCATATCCCT	2		21987	16		0	0	0	0	0	2624	0	0	0	0	0	0	0	0	0	0	0	1168	0	0	0	0	0	0	0	1861	1805	2186	0	0	0	0	765	0	0	0	0	0	0	0	0	0
293	>2.00_Harbor_seal_Phoca_largha_others	ACTATGCTTAGCCCTAAACATAAATAATTCACGTAACAAAATTATTCGCCAGAGAACTACTAGCAACAGCTTAAAACTCAAAGGACTTGGCGGTGCTTCACACCCCT	2		14400	16		0	1894	0	0	0	0	0	0	0	0	0	0	0	0	0	0	0	0	0	356	0	1068	569	0	0	0	0	0	1488	0	0	0	0	0	0	0	0	0	0	0	0	0
280	>2.00_Duck_sp_athya_sp98	ACTATGCCCGGCCCTAAATCTTGATACTTCCCATACCAAAGTATCCGCCAGAGAACTACGAGCACAAACGCTTAAAACTCTAAGGACTTGGCGGTGCCCTAAACCCAC	2		16894	15		0	0	1306	0	0	0	0	0	0	0	0	0	0	0	677	0	0	0	2055	0	0	1951	0	0	0	0	0	0	0	0	0	0	0	0	0	0	0	0	0	0	0	0
267	>2.00_Common_loon_Gavia_immer	ACTATGCCCAGCCCTAAATCTTGATGCTTACCCCACTGAAGCATCCGCCTGAGAACTACGAGCACAAACGCTTAAAACTCTAAGGACTTGGCGGTGCCCCAAACCCAC	2		25088	14		0	0	0	0	0	0	0	0	0	0	0	0	0	0	0	0	0	0	0	0	887	0	656	0	0	2079	0	0	0	0	0	0	0	0	0	0	0	0	0	0	0	0
307	>2.00_Netta_rufina100	ACTATGCCTGGCCCTAAATCTTGATACTTACCATACCAAAGTATCCGCCAGAGAACTACGAGCACAAACGCTTAAAACTCTAAGGACTTGGCGGTGCCCTAAACCCAC	2		20918	11		2599	0	0	0	0	0	0	0	0	0	0	0	0	0	0	0	0	0	0	0	0	3533	2095	835	0	0	0	0	0	0	0	0	0	0	0	0	0	0	0	0	0	0
272	>2.00_Cormorant99	ACTATGCCTAGCCCTAAATCTTGGCACTTCCCCCACTAAAGTGCCCGCCCGAGAACTACGAGCACAAACGCTTAAAACTCTAAGGACTTGGCGGTGCCCCAAACCCAC	2		7104	9		0	0	0	0	0	0	0	0	0	0	0	0	0	0	0	0	0	0	1238	0	0	0	0	0	0	0	0	0	0	0	0	0	0	0	0	0	0	0	0	0	0	0
321	>2.00_Racoon_Procyon_lotor	ACTATGCCTAGCCCTAAACATAAATAATTAACGTAACAAAATTATTTGCCAGAGAACTACTAGCAACAGCTTAAAACTCAAAGGACTTGGCGGTGCTTTACATCCCT	2		1868	7		0	0	0	0	0	0	0	0	0	0	0	0	0	0	0	0	0	0	0	0	0	0	0	0	0	0	0	0	0	0	0	0	0	0	0	0	0	0	0	0	0	0
347	>2.00_Willet_Tringa_semipalmata	ACTATGCTTAGCCCTAAATCTTGATGTTATCTCATACTAAAACATCCGCCCGAGAACTACGAGCACAAACGCTTAAAACTCTAAGGACTTGGCGGTGCCCTAAACCCAC	2		11835	6		0	0	0	0	0	0	0	0	0	0	0	0	0	0	0	0	0	0	0	0	0	0	0	0	0	0	0	0	0	0	0	0	0	0	0	0	0	0	0	0	0	0
275	>2.00_Diamondback_terrapin_Malaclemys_terrapin	ACTATGCTTAGCCCTAAACCTAGATATTTATATACAAAAATATCCGCCAGAGAATTACGAGCGAAAACGCTTAAAACTCTAAGGACTTGGCGGTACCTCAAACCCAC	2		10630	6		0	0	0	0	0	0	0	0	0	0	0	0	0	0	0	0	0	0	0	0	0	0	0	0	0	0	0	0	0	0	0	0	0	0	0	0	0	0	0	0	0	0
291	>2.00_Great_black_backed_gull_others	ACTATGCCTAGCCCTAAATCTCGATGCTTGCCGTACCAAAGCATCCGCCCGAGAACTACGAGCACAAACGCTTAAAACTCTAAGGACTTGGCGGTGCCCCAAACCCAC	2		6840	6		0	0	0	0	0	0	0	0	0	0	0	0	0	0	0	343	0	0	0	0	1499	0	0	0	0	0	0	0	0	0	0	0	0	0	0	0	0	0	0	0	0	0
304	>2.00_Meadow_vole_Microtus_pennsylvanicus	ACTATGCTTAGCCCTAAACTTCAATAATTTTAAAACAAAAATATTTGCCTGAGAACTACTGGCTACAGCTTAAAACTCAAAGGACTTGGCGGTACTTTATATCCAT	2		1971	6		0	0	0	0	0	0	0	0	0	0	0	0	0	0	0	0	0	0	0	0	0	0	0	0	0	0	0	0	0	0	0	0	0	0	0	0	0	0	0	0	0	0
289	>2.00_Gray_squirrel_Sciurus_carolinensis	ACTATGCTTAGCCCTAAACATAAATATTCAATTAACAAGAATATTCGCCAGAGAACTACTAGCCACTGCTTAAAACTCAAAGGACTTGGCGGTGCTTTATACCCCT	2		1016	5		0	0	0	0	0	0	0	0	0	0	0	0	0	0	0	0	0	0	0	0	0	0	0	0	0	0	0	0	0	0	0	0	0	0	0	0	0	0	0	0	0	0
332	>2.00_Sandpiper_2_Limnodromus98	ACTATGCTTAGCCTTAAATCTTGATGCTCTCCTGTACTAAAGCATCCGCCTGAGAACTACGAGCACAAACGCTTAAAACTCTAAGGACTTGGCGGTGCCCTAAACCCAC	2		6979	4		0	0	0	0	0	0	0	0	0	0	0	0	0	0	0	0	0	0	0	0	0	0	0	0	0	0	0	0	0	0	0	0	0	0	0	0	0	0	0	0	0	0
279	>2.00_Duck_sp_Athya_sp	ACTATGCCTGGCCCTAAATCTTGATACTTACTATACCAAAGTATCCGCCAGAGAACTACGAGCACAAACGCTTAAAACTCTAAGGACTTGGCGGTGCCCTAAACCCAC	2		5433	4		0	0	0	0	0	0	0	0	0	0	0	0	0	0	0	0	0	0	0	0	0	0	0	0	0	0	0	0	0	0	0	0	0	0	0	0	0	0	0	0	0	0
248	>2.00_American_crow_other_corvids	ACTATGCCTGGCCCTAAATCTTGATGCTCTATGCTACCTGAGCATCCGCCCGAGAACTACGAGCACAAACGCTTAAAACTCTAAGGACTTGGCGGTGTCCCAAACCCAC	2		3787	4		0	0	0	0	0	0	0	0	0	0	0	0	0	0	0	0	0	0	0	0	0	0	0	0	0	0	0	0	0	0	0	0	0	0	0	0	0	0	0	0	0	0
326	>2.00_Red_throated_loon_Gavia_stellata	ACTATGCCCAGCCCTAAATCTTGATGCTTACCCTACTGAAGCATCCGCCTGAGAACTACGAGCACAAACGCTTAAAACTCTAAGGACTTGGCGGTGCCCCAAACCCAC	2		3421	4		0	0	0	0	0	0	0	0	0	0	0	0	0	0	0	0	0	0	0	0	0	281	0	0	0	0	0	0	0	0	0	0	0	0	0	0	0	0	0	0	0	0
274	>2.00_Deer_mouse_Peromyscus_leucopus	ACTATGCTTAGCCCTAAACCTTAAAGATTAAATAACAAAATCATTTGCCTGAGAACTACTGGCTACCGCTTAAAACTCAAAGGACTTGGCGGTACTTTATATCCAT	2		11551	3		0	0	0	0	0	0	0	0	0	0	0	0	0	0	0	0	0	0	0	0	0	0	0	0	0	0	0	0	0	0	0	0	0	0	0	0	0	0	0	0	0	0
299	>2.00_Humpback_whale	ACTATGCTTAGTCGTAAACCCTAATAGTCACAAAACAAGACTATTCGCCAGAGTACTACTAGCAACAGCCTAAAACTCAAAGGACTTGGCGGTGCTTCATACCCCT	2		3230	3		0	0	0	0	0	0	0	0	0	0	0	0	0	0	0	0	0	0	0	0	0	0	0	2734	0	0	0	0	0	0	0	0	0	0	0	0	0	0	0	0	0	0
327	>2.00_Ring_billed_gull_Larus_delawarensis	ACTATGCCTAGCCCTAAATCTCGATGCTTGCCGTACCAAAGCATCCGCCTGAGAACTACGAGCACAAACGCTTAAAACTCTAAGGACTTGGCGGTGCCCCAAACCCAT	2		1777	3		0	0	0	0	0	0	0	0	0	0	0	128	0	0	0	0	0	0	0	0	0	0	0	0	0	0	0	0	0	0	0	0	0	0	0	0	0	0	0	0	0	0
344	>2.00_Tree_swallow_Tachycineta_bicolor(2)	ACTATGCCTGGCCCTAAATCTTGATGCTCGATCTTACCGGAGCATCCGCCCGAGAACTACGAGCACAAACGCTTAAAACTCTAAGGACTTGGCGGTGTCCCAAACCCAC	2		998	3		0	0	0	0	0	0	0	0	0	0	0	0	0	0	0	0	0	0	0	0	0	0	0	0	0	0	0	0	0	0	0	0	0	0	0	0	0	0	0	0	0	0
346	>2.00_White_tailed_deer_Odocoileus_virginianus	ACTATGCTTAGCCCTAAACATAAATAGTTATATAAACAAAACTATTCGCCAGAGTACTACCGGCAATAGCTTAAAACTCAAAGGACTTGGCGGTGCTTTATACCCTT	2		925	3		0	0	0	0	0	0	0	0	0	0	0	0	0	0	0	0	0	0	0	0	0	0	0	0	0	0	0	0	0	0	0	0	0	0	0	0	0	0	0	0	0	0
308	>2.00_Netta_rufina99	ACTATGCCTGGCCCTAAATCTTGATACTTACCATACCAAAGTATCCGCCAGAGAACTACGAGCACAAACGCTTGAAACTCTAAGGACTTGGCGGTGCCCTAAACCCAC	2		4647	2		0	0	0	0	0	0	0	0	0	0	0	0	0	0	0	0	0	0	0	0	4026	0	0	0	0	0	0	0	0	0	0	0	0	0	0	0	0	0	0	0	0	0
320	>2.00_Prob_great_blue_heron_ardea_cinerea100	ACTATGCTCAGCCTTAAATCTTGGTACTTAACTTACTAAAGTATCCGCCTGAGAACTACGAGCACAAACGCTTAAAACTCTAAGGACTTGGCGGTGCCCCAAACCCAC	2		2972	2		0	0	0	0	0	0	0	0	0	0	0	0	0	0	0	0	0	0	0	0	0	0	0	0	0	0	0	0	0	0	0	0	0	0	0	0	0	0	0	0	0	0
253	>2.00_black_bellied_or_golden_plover_Pluvialis_squatarola_dominica	ACTATGCCTAGCCCTAAATCCTGATGCTTACCCTACCAAAGCATCCGCCTGAGAACTACGAGCGCAAACGCTTAAAACTCTAAGGACTTGGCGGTGCCCCAAACCCAC	2		2861	2		0	0	0	0	0	0	0	0	0	0	0	0	0	0	0	0	0	0	2208	0	0	0	0	0	0	0	0	0	0	0	0	0	0	0	0	0	0	0	0	0	0	0
329	>2.00_Rock_or_mourning_dove_Columba_livia_or_Zenaida_macroura	ACTATGCCTGGCCCTAAATCTAGATGCTTATGTTACTAAAGCATCCGCCCGAGGACTACGAGCACAAACGCTTAAAACTCTAAGGACTTGGCGGTGCCCTAAACCCAC	2		977	2		0	0	0	0	0	0	0	0	0	0	0	0	0	0	0	0	0	0	0	0	0	0	0	0	0	0	0	0	0	0	0	0	0	0	0	0	0	0	0	0	0	0
295	>2.00_Horse_Equus_caballus	ACTATGCTTAGCCCTAAACTAAAATAGCTTACCACAACAAAGCTATTCGCCAGAGTACTACTAGCAACAGCCTAAAACTCAAAGGACTTGGCGGTGCTTTACATCCCT	2		752	2		0	0	0	0	0	0	0	0	0	0	0	0	0	0	0	0	0	0	0	0	0	0	0	0	0	0	0	0	0	0	0	0	0	0	0	0	0	0	0	0	0	0
324	>2.00_Red_fox_Vulpes_vulpes	ACTATGCTTAGCCCTAAACATAAATAGTTCTATAACAAAACAATTCGCCAGAGAACTACTAGCAACAGCTTAAAACTCAAAGGACTTGGCGGTGCTTTATATCCCT	2		665	2		0	0	0	0	0	0	0	0	0	0	0	0	0	0	0	0	0	0	0	0	0	0	0	0	0	0	0	0	0	0	0	0	0	0	0	0	0	0	0	0	0	0
298	>2.00_House_sparrow_Passer_domesticus	ACTATGCCTGGCCCTAAATCTTGATGCTTAAACCTACTAAAGCATCCGCCCGAGAACTACGAGCACTAACGCTTAAAACTCTAAGGACTTGGCGGTGCCCCAAACCCAC	2		652	2		0	0	0	0	0	0	0	0	0	0	0	0	0	0	0	0	0	0	0	0	0	0	0	0	0	0	0	0	0	0	499	0	0	0	0	0	0	0	0	0	0	0
322	>2.00_Rail_Rallus_sp	ACTATGCCTAGCCCTAAATCTAGATGTTTACCCTACCAAAACATCCGCCCGAGAACTACGAGCACAAACGCTTAAAACTCTAAGGACTTGGCGGTGCTCCAAACCCAC	2		604	2		0	0	0	0	0	0	0	0	0	0	0	0	0	0	0	0	0	0	0	0	0	0	0	0	0	0	0	0	0	0	0	0	0	0	0	0	0	0	0	0	0	0
251	>2.00_American_robin_others_Turdus_migratorius	ACTATGCCTGGCCCTAAATCTTGATGCTCGATATTACCTGAGCATCCGCCCGAGAACTACGAGCACAAACGCTTAAAACTCTAAGGACTTGGCGGTGCTCCAAACCCAC	2		425	2		0	0	0	0	0	0	0	0	0	0	0	0	0	0	0	0	0	0	0	0	0	0	0	0	0	0	0	0	0	0	0	0	0	0	0	0	0	0	0	0	0	0
310	>2.00_Northern_gannet_Morus_bassanus_incomplete_refseq	ACTATGCCTAGCCTTAAATCTTGGCACTTACCCTACTAAAGTGCCCGCCTGAGAACTACGAGCACAAACGCTTAAAACTCTAAGGACTTGGCGGTGCTCTAAACCCAC	2		371	2		0	0	0	0	0	0	0	0	0	0	0	0	0	0	0	0	0	0	0	0	0	0	0	0	0	0	0	362	0	9	0	0	0	0	0	0	0	0	0	0	0	0
313	>2.00_Norway_rat_Rattus_norvegicus	ACTATGCTTAGCCCTAAACCTTAATAATTAAACCTACAAAATTATTTGCCAGAGAACTACTAGCTACAGCTTAAAACTCAAAGGACTTGGCGGTACTTTATATCCAT	2		356	2		0	0	0	0	0	0	0	0	0	0	0	0	0	0	0	0	0	0	0	0	0	0	0	0	0	0	0	0	0	0	315	0	0	0	0	0	0	0	0	0	0	0
294	>2.00_Horned_grebe_Podiceps_auritus	ACTATGCTTAGCCCTAAATCTTGATACTTACTATACTAAAGTATCCGCCTGAGAACTACGAGCACAAACGCTTAAAACTCTAAGGACTTGGCGGTGCCCCAAACCCAC	2		243	2		0	0	0	0	0	0	0	0	0	0	0	0	0	0	0	0	0	0	0	0	0	0	0	0	0	0	0	0	0	0	0	0	0	0	0	0	0	0	0	0	0	0
284	>2.00_European_toad_Bufo_bufo	ACTATGCCCAGCCGTAAACTTTTACTTACATCAAATCGCCAGGGAACTACGAGCCAAGCTTAAAACCCAAAGGACTTGACGGTACCCCACATCCCC	2		3590	1		0	0	0	0	0	0	0	0	0	0	0	0	0	0	0	0	0	0	0	0	0	0	0	0	0	0	0	0	0	0	0	0	0	0	0	0	0	0	0	0	0	0
325	>2.00_Red_knot_Calidris_canutus	ACTATGCTTAGCCCTAAATCTTGATGTTCTCTCGTACTAAAACATCCGCCCGAGAACTACGAGCACAAACGCTTAAAACTCTAAGGACTTGGCGGTGCCCTAAACCCAC	2		690	1		0	0	0	0	0	0	0	0	0	0	0	0	0	0	0	0	0	0	0	0	0	0	0	0	0	0	0	0	0	0	0	0	0	0	0	0	0	0	0	0	0	0
270	>2.00_Common_starling_Sturnus_vulgaris	ACTATGCCTGGCCCTAAATCTTGATGCTCTACTTTACCTGAGCGTCCGCCCGAGAACTACGAGCACAAACGCTTAAAACTCTAAGGACTTGGCGGTGTCCCAAACCCAC	2		611	1		0	0	0	0	0	0	0	0	0	0	0	0	0	0	0	0	0	0	0	0	0	0	0	0	0	0	0	0	0	0	0	0	0	0	0	0	0	0	0	0	0	0
244	>2.00_American_beaver_Castor_canadensis	ACTATGCTTAGCCGTAAACTTAGATATGTAAACCTAACAAACATATTCGCCAGAGAACTACTAGCAATTGCTTAAAACTCAAAGGACTTGGCGGTGCTTTATATCCAT	2		604	1		0	0	0	0	0	0	0	0	0	0	0	0	0	0	0	0	0	0	0	0	0	0	0	0	0	0	0	0	0	0	0	0	0	0	0	0	0	0	0	0	0	0
278	>2.00_Downy_woodpecker_Picoides_pubescens	ACTATGCCTGGCCGTAAATTCAAATGCTTCTTCTCACCCAAGCATTCGCCAGGGAATTACGAGCACAAACGCTTAAAACCCTAAGGACTTGGCGGTGTCCCAAACCCAC	2		590	1		0	0	0	0	0	0	0	0	0	0	0	0	0	0	0	0	0	0	0	0	0	0	0	0	0	0	0	0	0	0	0	0	0	0	0	0	0	0	0	0	0	0
345	>2.00_Turkey_Meleagris_gallopavo	ACTATGCCTGGCCCTAAATCTTGATACTAATATACTCACGTATCCGCCTGAGAACTACGAGCACAAACGCTTAAAACTCTAAGGACTTGGCGGTGCCCTAAACCCAC	2		513	1		0	0	0	0	0	0	0	0	0	0	0	0	0	0	0	0	0	0	0	0	0	0	0	0	0	0	0	0	0	0	0	0	0	0	0	0	0	0	0	0	0	0
287	>2.00_Glossy_ibis_refseq_incomplete	ACTATGCCTAGCCCTAAATCTTGGTACTTCCCCTACTTAAGTATCCGCCTGAGAACTACGAGCACAAACGCTTAAAACTCTAAGGACTTGGCGGTGCCCCAAACCCAC	2		481	1		0	0	0	0	0	0	0	0	0	0	0	0	0	0	0	0	0	0	0	0	0	0	0	0	0	0	0	0	0	0	0	0	0	0	0	0	0	0	0	0	0	0
260	>2.00_Cat_Felis_catus	ACTATGCTTAGCCCTAAACTTAGATAGTTATCCTAAACAAAACTATCCGCCAGAGAACTACTAGCAATAGCTTAAAACTCAAAGGACTTGGCGGTGCTTTACATCCCT	2		421	1		0	0	0	0	0	0	0	0	0	0	0	0	0	0	0	0	0	0	0	0	0	0	0	0	0	0	0	0	0	0	0	0	0	0	0	0	0	0	0	0	0	0
255	>2.00_Black_crowned_night_heron99	ACTATGCTCAGCCCTAAATCTAGATACTCAACCTACCAAAGTATCCGCCCGAGAACTACGAGCACAAACGCTTAAAACTCTAAGGACTTGGCGGTGCCCTAAACCCAC	2		348	1		0	0	0	0	0	0	0	0	0	0	0	0	0	0	0	0	0	0	0	0	0	0	0	0	0	0	0	0	0	0	0	0	0	0	0	0	0	0	0	0	0	0
306	>2.00_Muskrat_Ondatra_zibethicus99	ACTATGCTTAGCCCTAAACTTCAATATATATAATACAAAACAAATATATTTGCCTGAGAACTACTGGCCACAGCTTAAAACTCAAAGGACTTGGCGGTACTTTATATCCAT	2		231	1		0	0	0	0	0	0	0	0	0	0	0	0	0	0	0	0	0	0	0	0	0	0	0	0	0	0	0	0	0	0	0	0	0	0	0	0	0	0	0	0	0	0
257	>2.00_Black_skimmer_Rhynchops_niger	ACTATGCCTAGCCCTAAATCTTGATGCTTACCGTACCAAAGCATCCGCCTGAGAACTACGAGCACAAACGCTTAAAACTCTAAGGACTTGGCGGTGCTCCAAACCCAC	2		186	1		0	0	0	0	0	0	0	0	0	0	0	0	0	0	0	0	0	0	0	0	0	0	0	0	0	0	0	0	0	0	0	0	0	0	0	0	0	0	0	0	0	0
315	>2.00_Osprey_Pandion_haliaetus	ACTATGCCTGGCCCTAAATCTCAGTGCTTGACTAACTAAAGCACTCGCCCGAGAACTACGAGCACAAACGCTTAAAACTCTAAGGACTTGGCGGTGCCTCAAACCCAC	2		140	1		0	0	0	0	0	0	0	0	0	0	0	0	0	0	0	0	0	0	0	0	0	0	0	0	0	0	0	0	0	0	0	0	0	0	0	0	0	0	0	0	0	0
328	>2.00_River_otter_Lontra_canadensis	ACTATGCTCAGCCCTAAACATGGATAGCTAACATAACAAAACTATCTGCCAGAGAACTACTAGCAACAGCTTAAAACTCAAAGGACTTGGCGGTGCTTTACATCCCT	2		124	1		0	0	0	0	0	0	0	0	0	0	0	0	0	0	0	0	0	0	0	0	0	0	0	0	0	0	0	0	0	0	0	0	0	0	0	0	0	0	0	0	0	0
296	>2.00_House_mouse_Mus_musculus	ACTATGCTTAGCCATAAACCTAAATAATTAAATTTAACAAAACTATTTGCCAGAGAACTACTAGCCATAGCTTAAAACTCAAAGGACTTGGCGGTACTTTATATCCAT	2		110	1		0	0	0	0	0	0	0	0	0	0	0	0	0	0	0	0	0	0	0	0	0	0	0	0	0	0	0	0	0	0	0	0	0	0	0	0	0	0	0	0	0	0
269	>2.00_Common_shrew_Sorex_cinereus	ACTATGCTTAGCCCTAAACTTAGGTATTTAACTAACAAAAATACCCGCCAGAGAACTACTAGCAATAGCTTAAAACTCAAAGGACTTGGCGGTGCTTTATATCCCT	2		65	1		0	0	0	0	0	0	0	0	0	0	0	0	0	0	0	0	0	0	0	0	0	0	0	0	0	0	0	0	0	0	0	0	0	0	0	0	0	0	0	0	0	0
331	>2.00_Royal_tern_Thalasseus_maximus	ATTATGCCTAGCCCTAAATCTTGATGTTTGTCATACTAAAGCATCCGCCTGAGAACTACGAGCACAAACGCTTAAAACTCTAAGGACTTGGCGGTGCCCCAAACCCAC	2		33	1		0	0	0	0	0	0	0	0	0	0	0	0	0	0	0	0	0	0	0	0	0	0	0	0	0	0	0	0	0	0	0	0	0	0	0	0	0	0	0	0	0	0
305	>2.00_Multiple_finches_sparrows_blackbirds	ACTATGCCTGGCCCTAAATCTTGATGCTTACACCTACTAAAGCATCCGCCCGAGAACTACGAGCACTAACGCTTAAAACTCTAAGGACTTGGCGGTGCCCCAAACCCAC	2		19	1		0	0	0	0	0	0	0	0	0	0	0	0	0	0	0	0	0	0	0	0	0	0	0	0	0	0	0	0	0	0	0	0	0	0	0	0	0	0	0	0	0	0
[truncated: 194 more columns]
